# Supplementary material for: Stress-inducible phosphoprotein 1 (HOP/STI1/STIP1) regulates the accumulation and toxicity of α-synuclein in vivo
Source: PubMed Central journal article supplement (PMC9547791; doi:10.1007/s00401-022-02491-8), 2022-09-19
Supplement: 401_2022_2491_MOESM1_ESM.pdf [file 401_2022_2491_MOESM1_ESM.pdf]

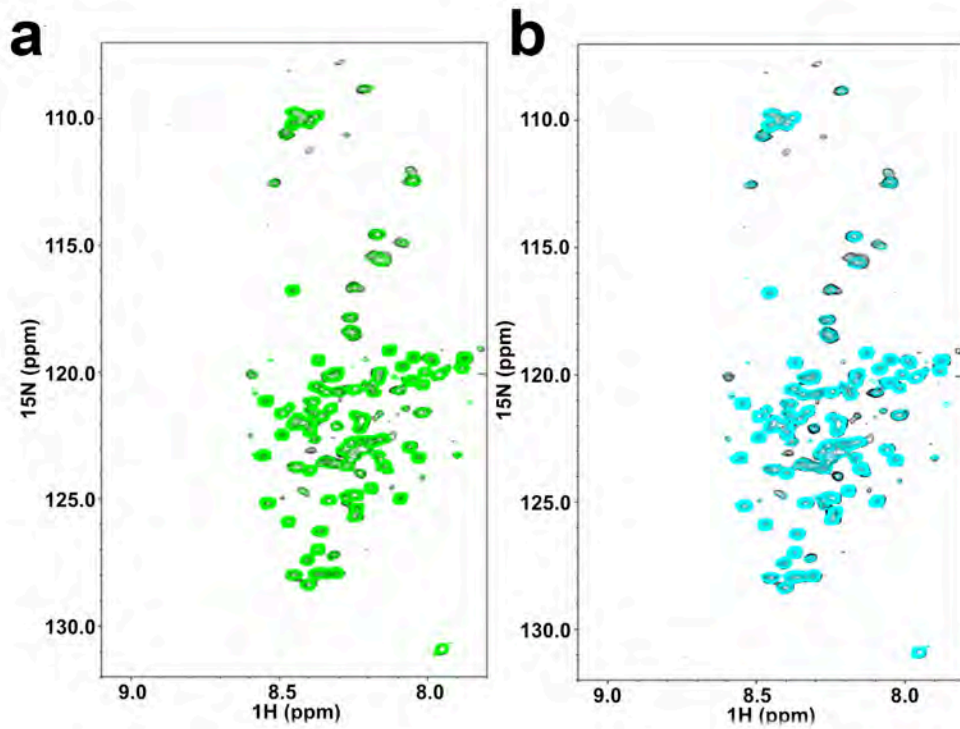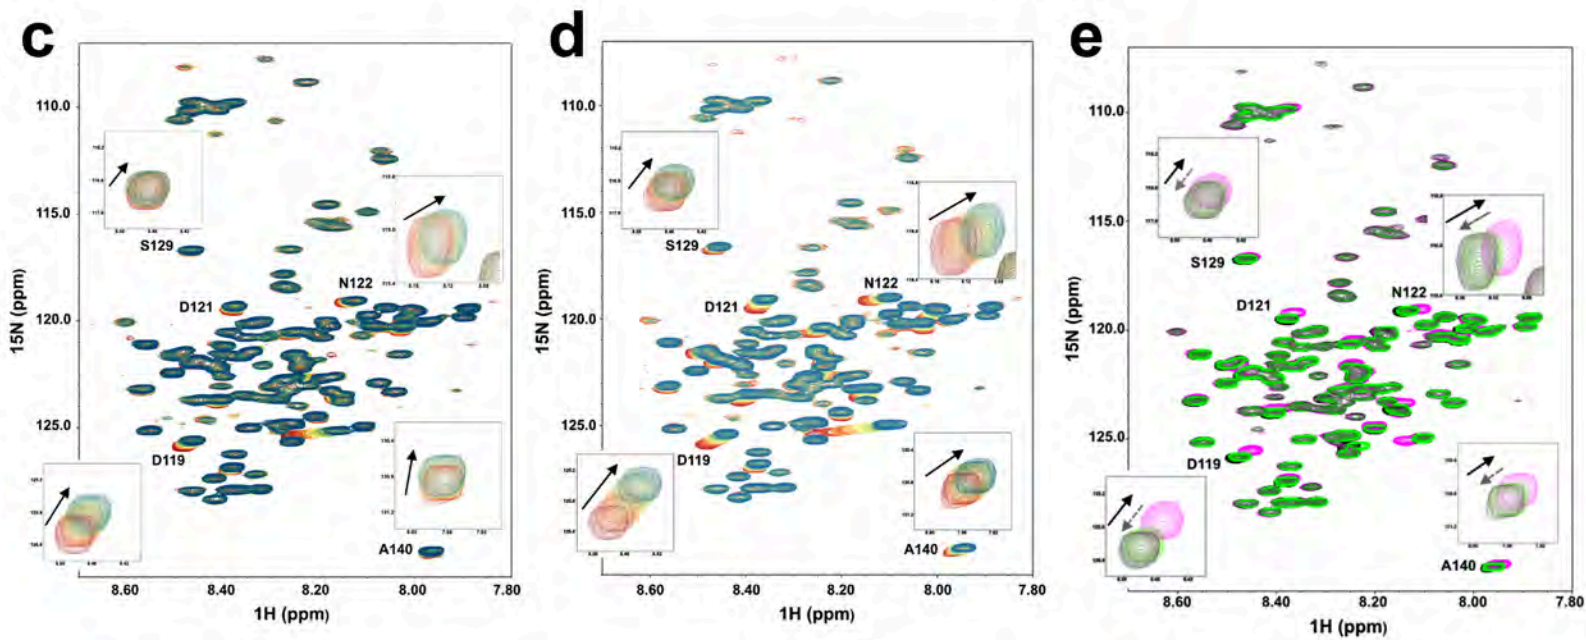

Fig. S1

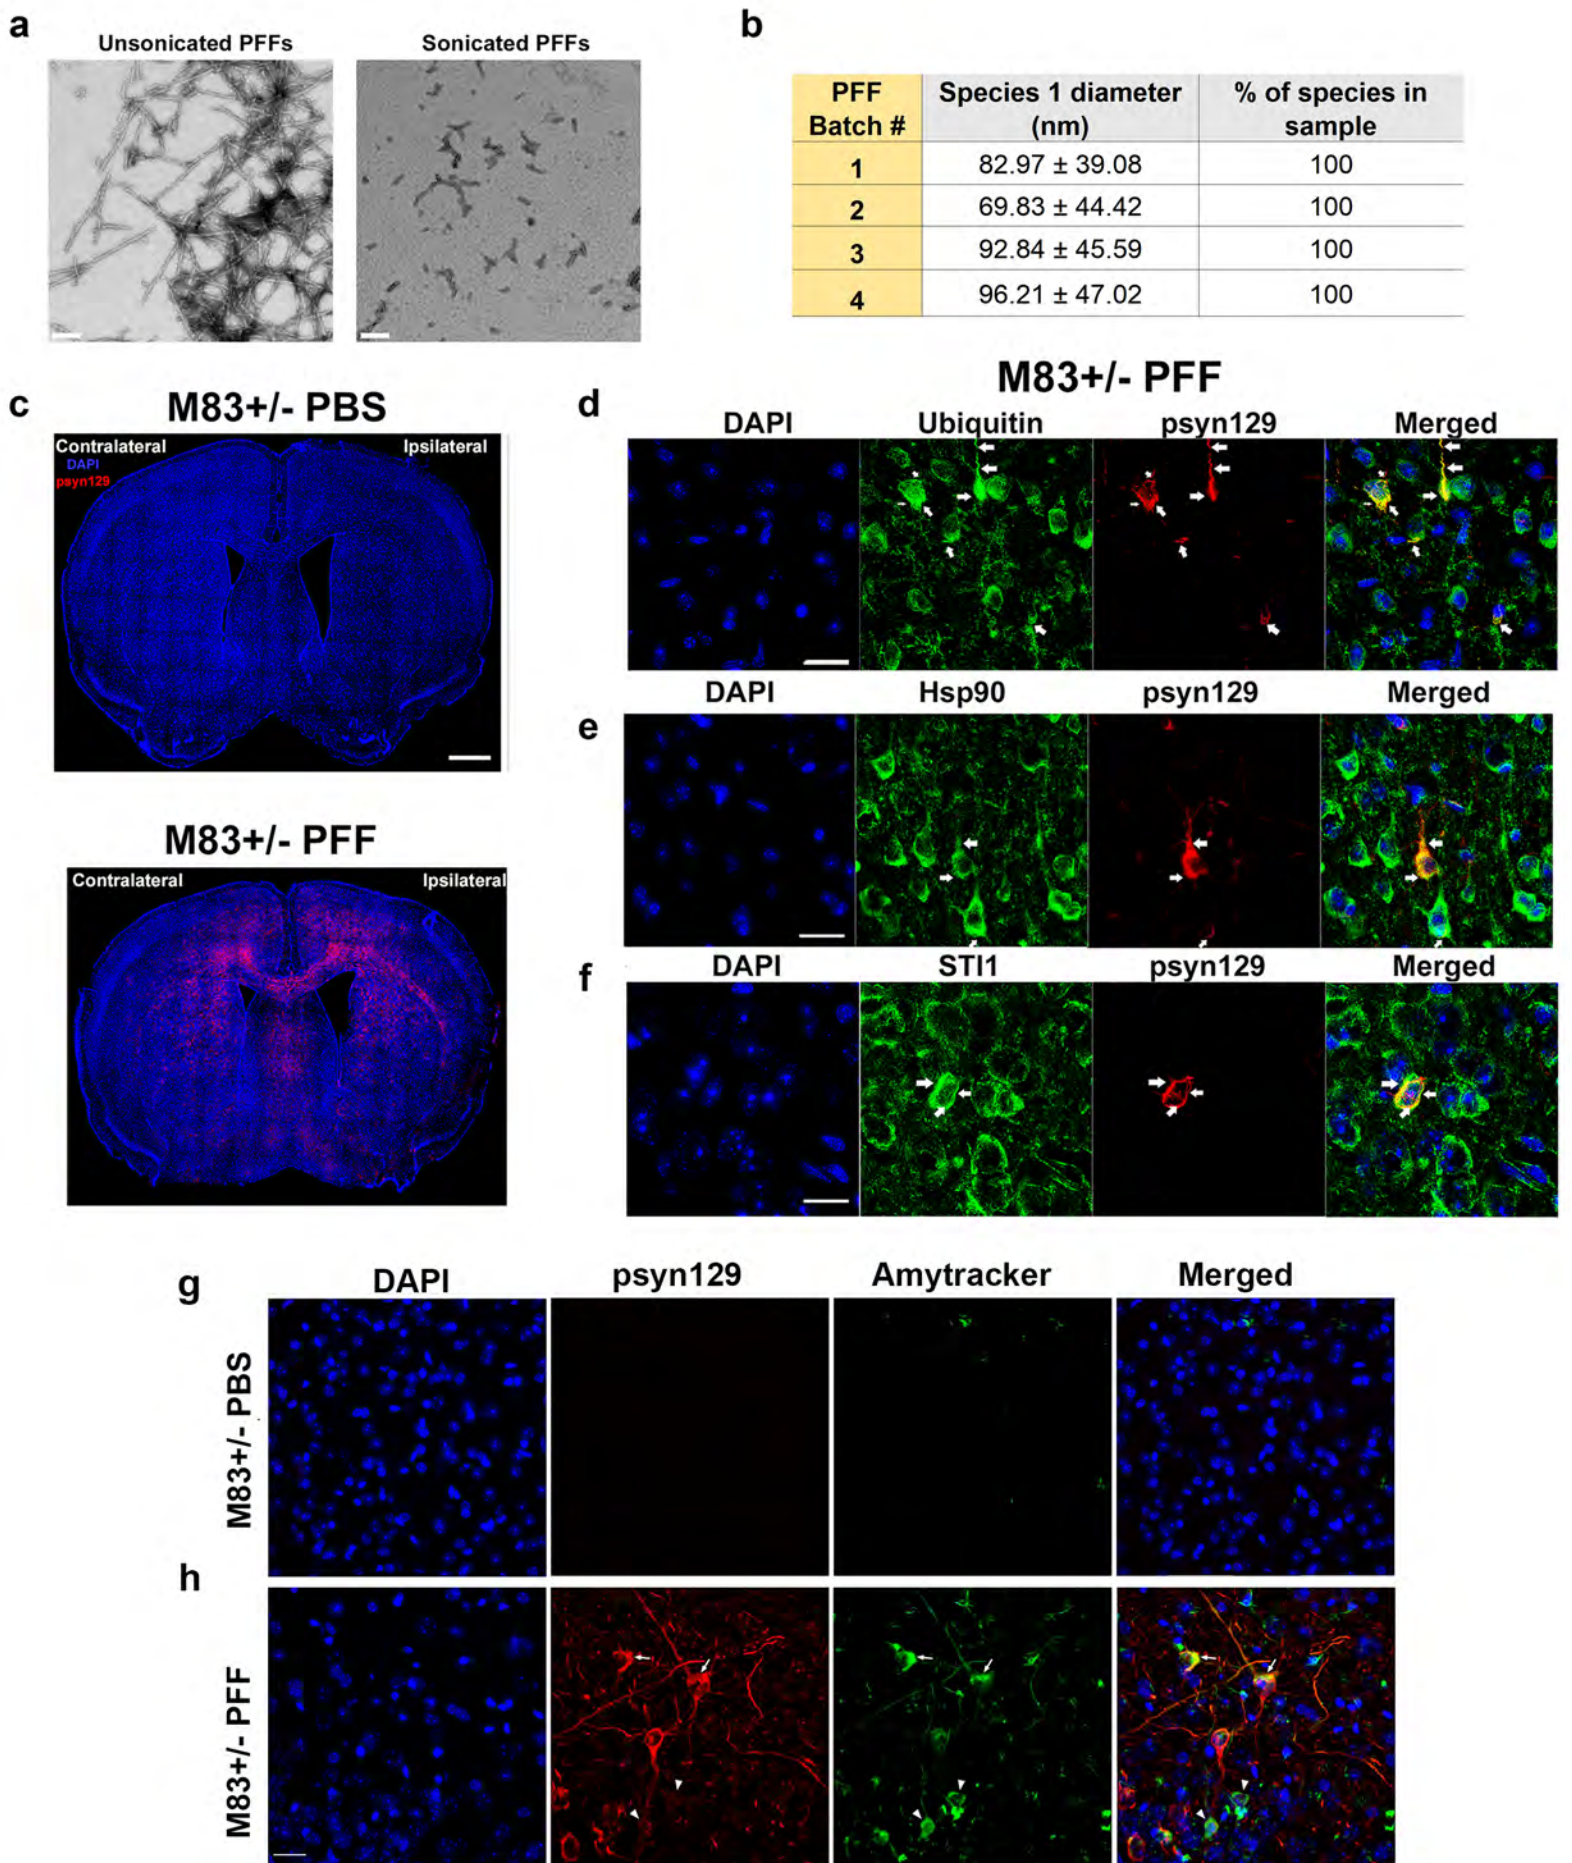

Fig. S2

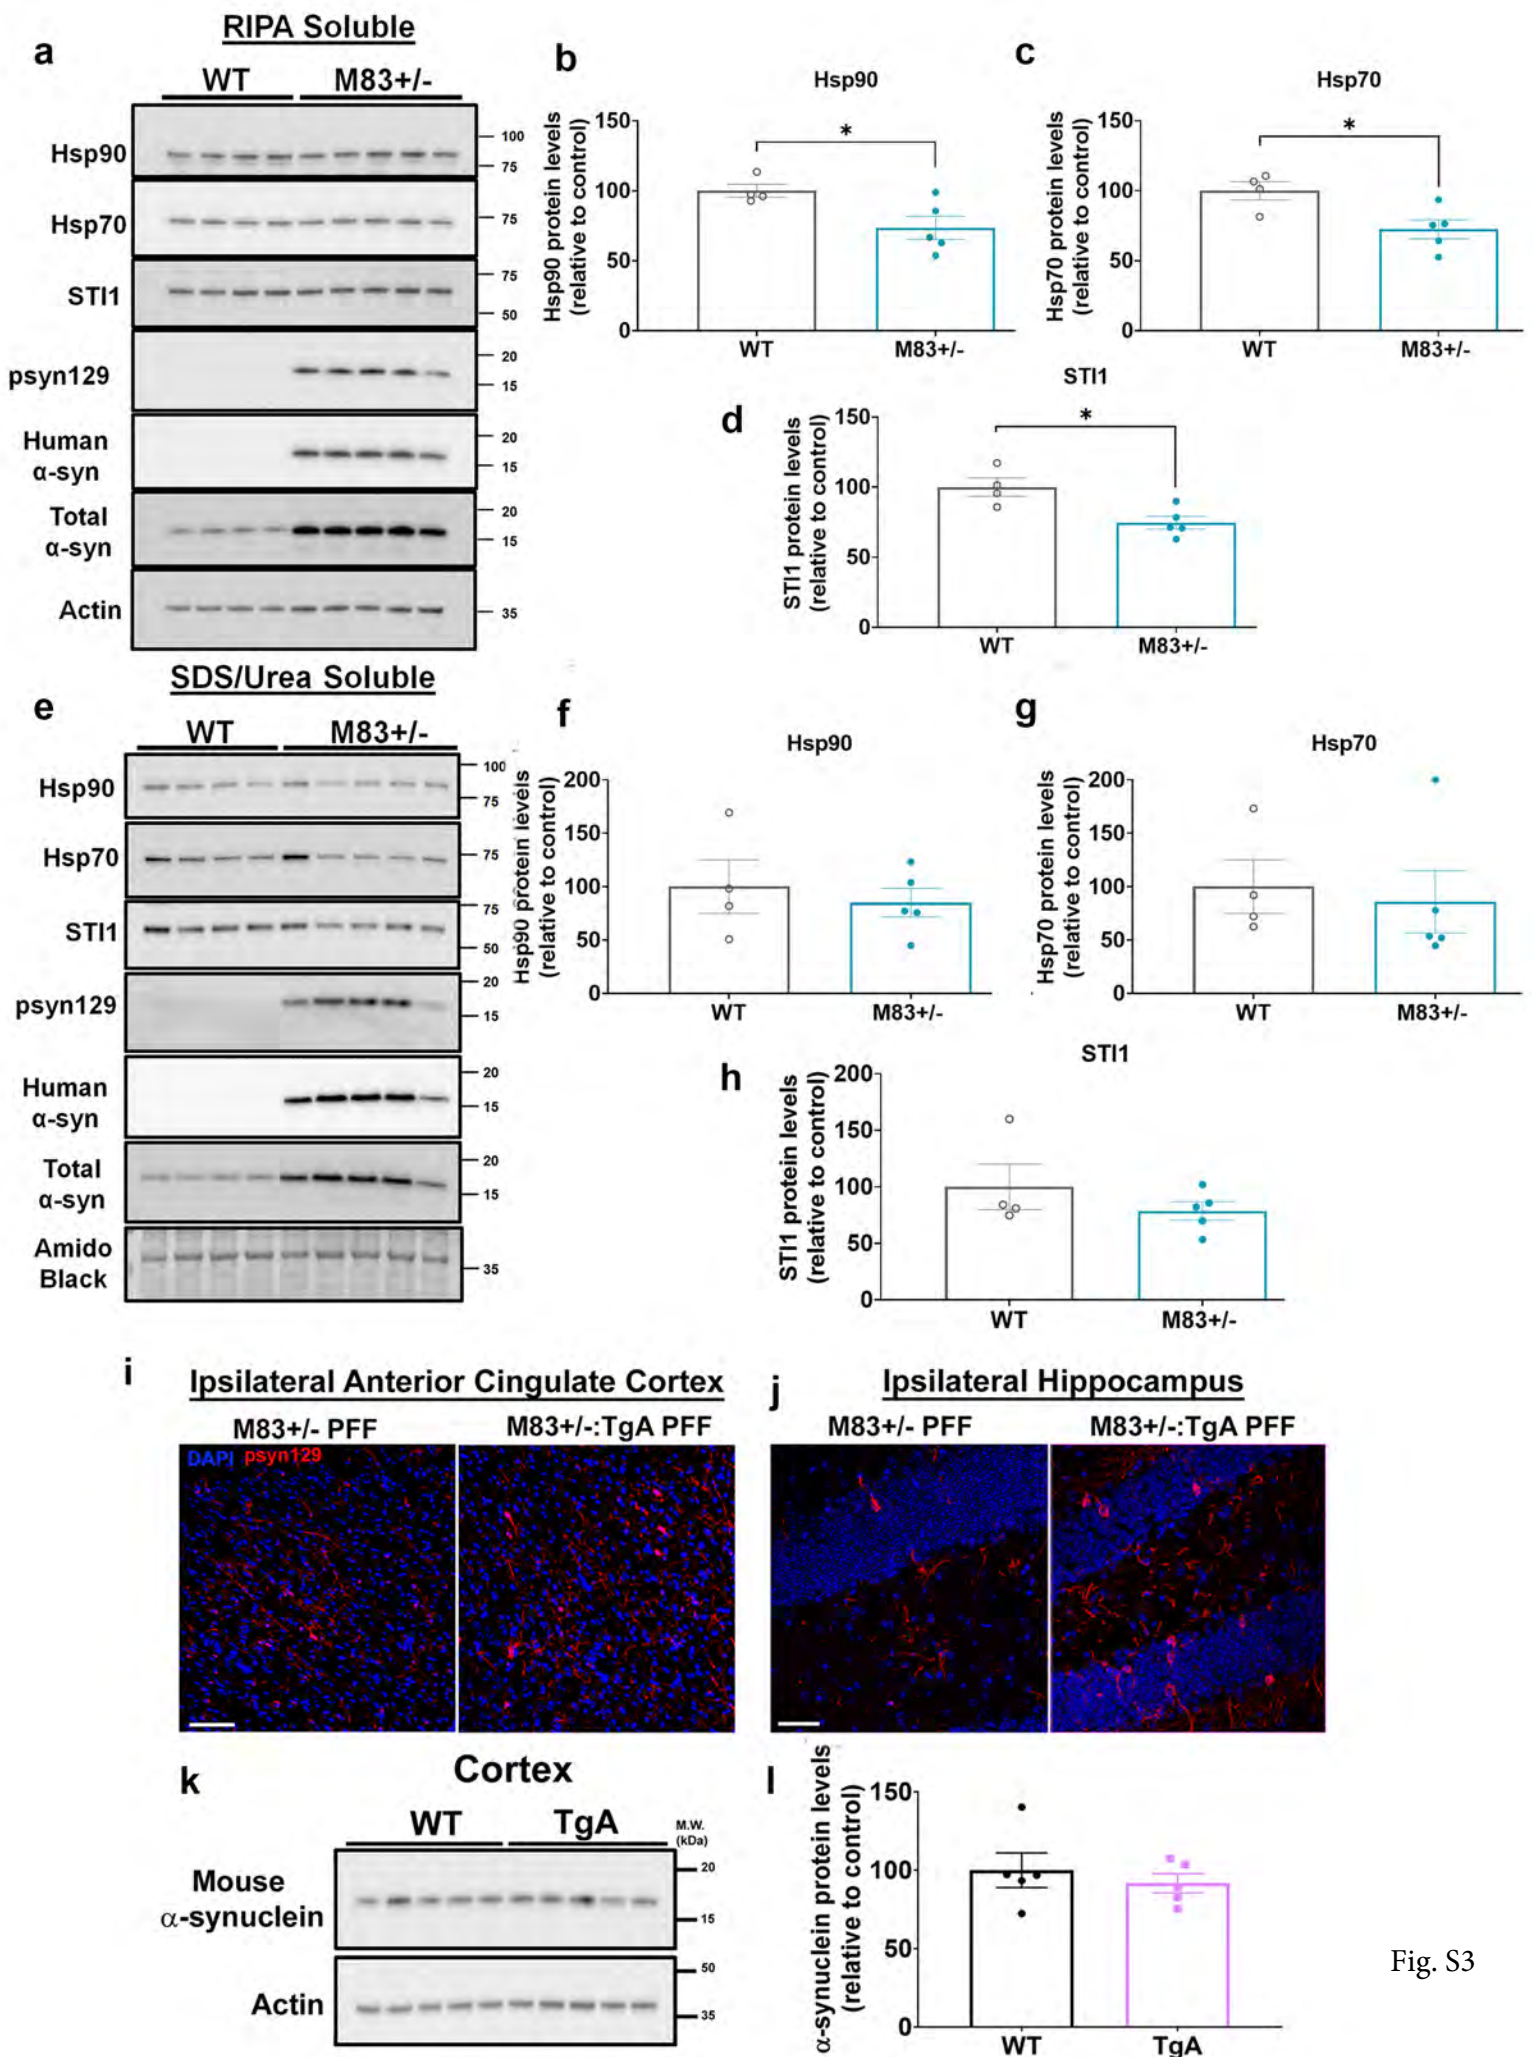

Fig. S3

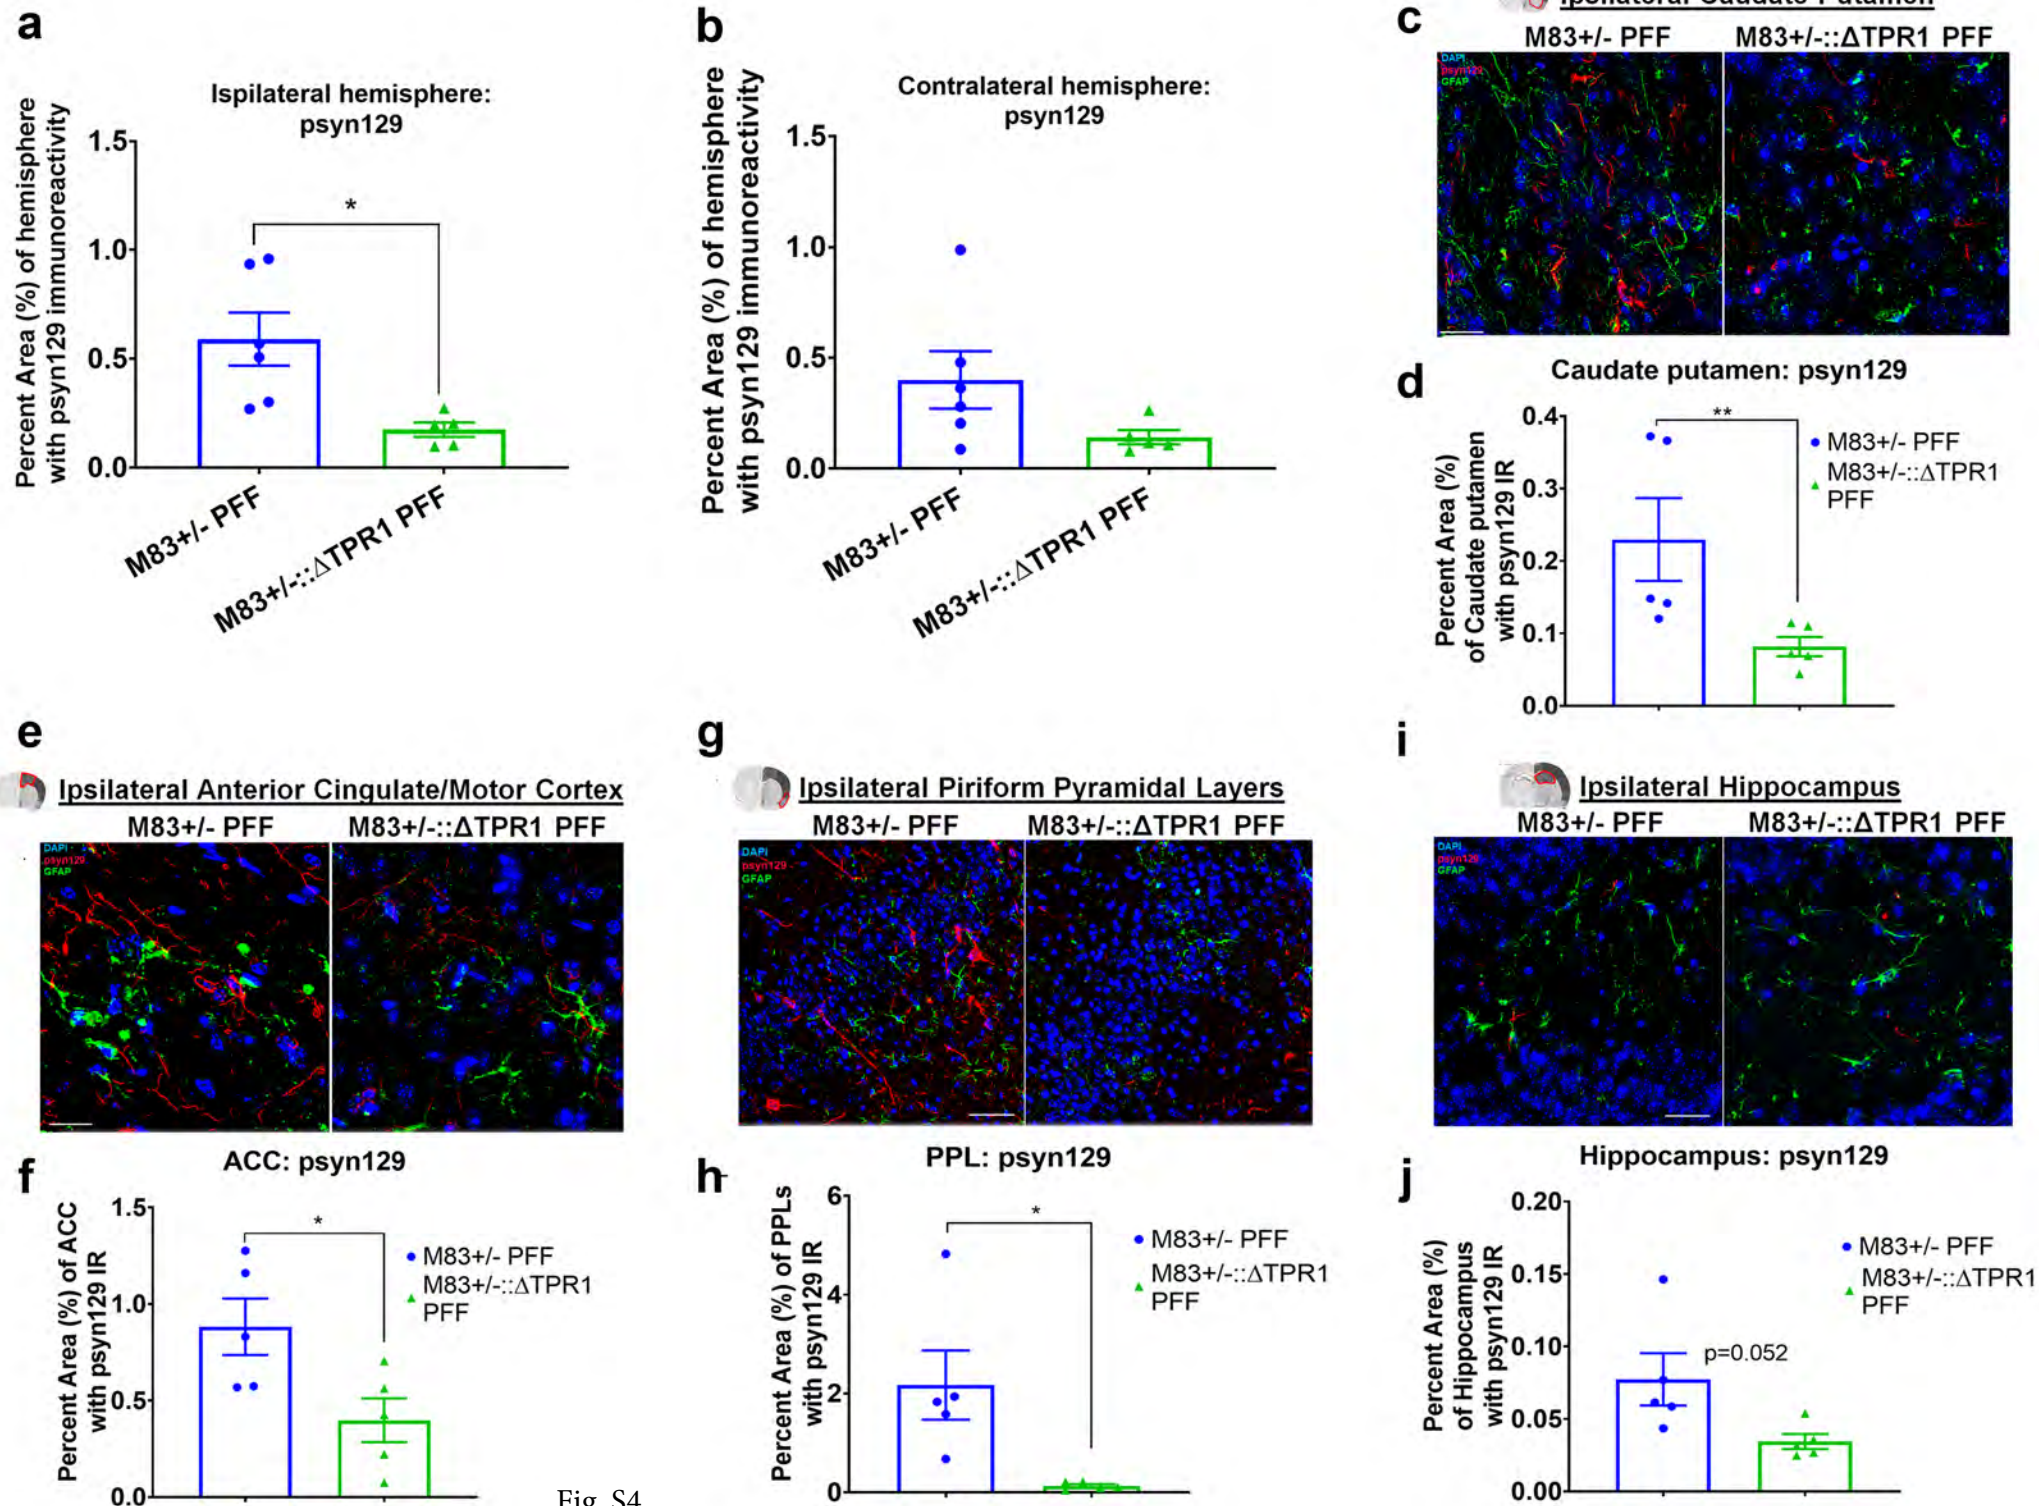

Fig. S4

**a****Anterior Cingulate Cortex**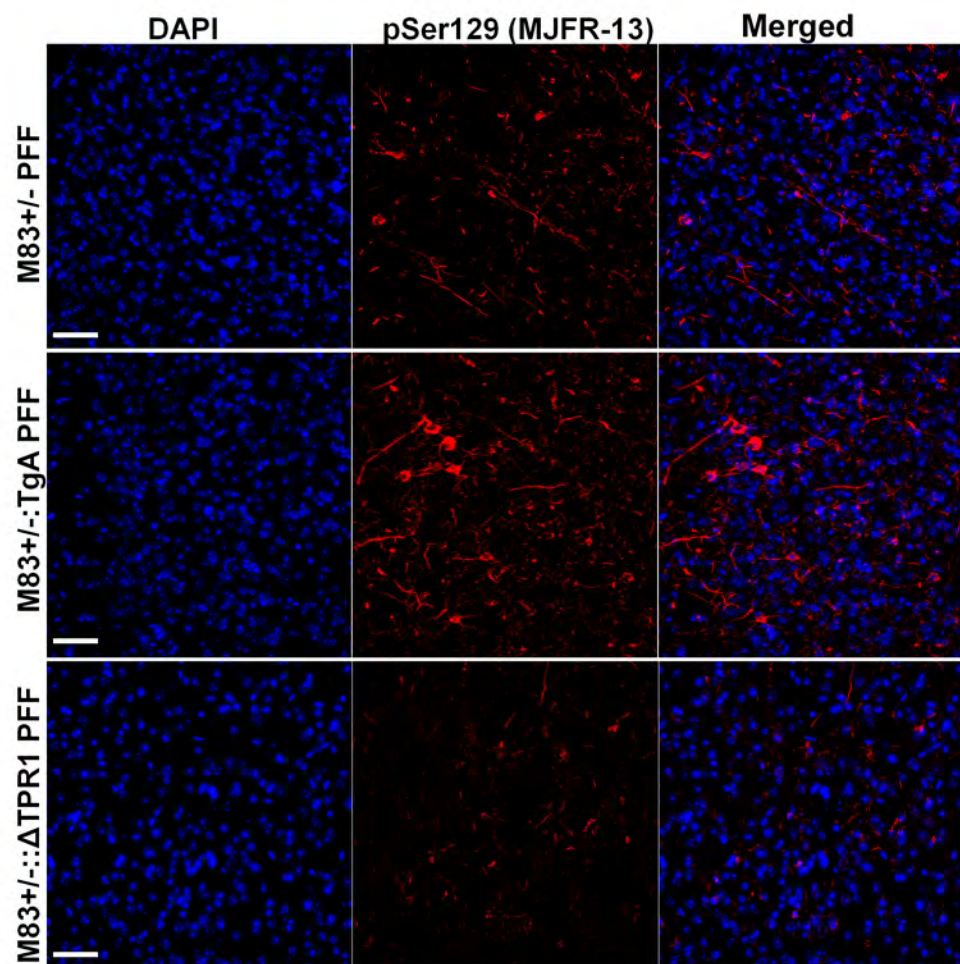**b****Piriform Pyramidal Layers**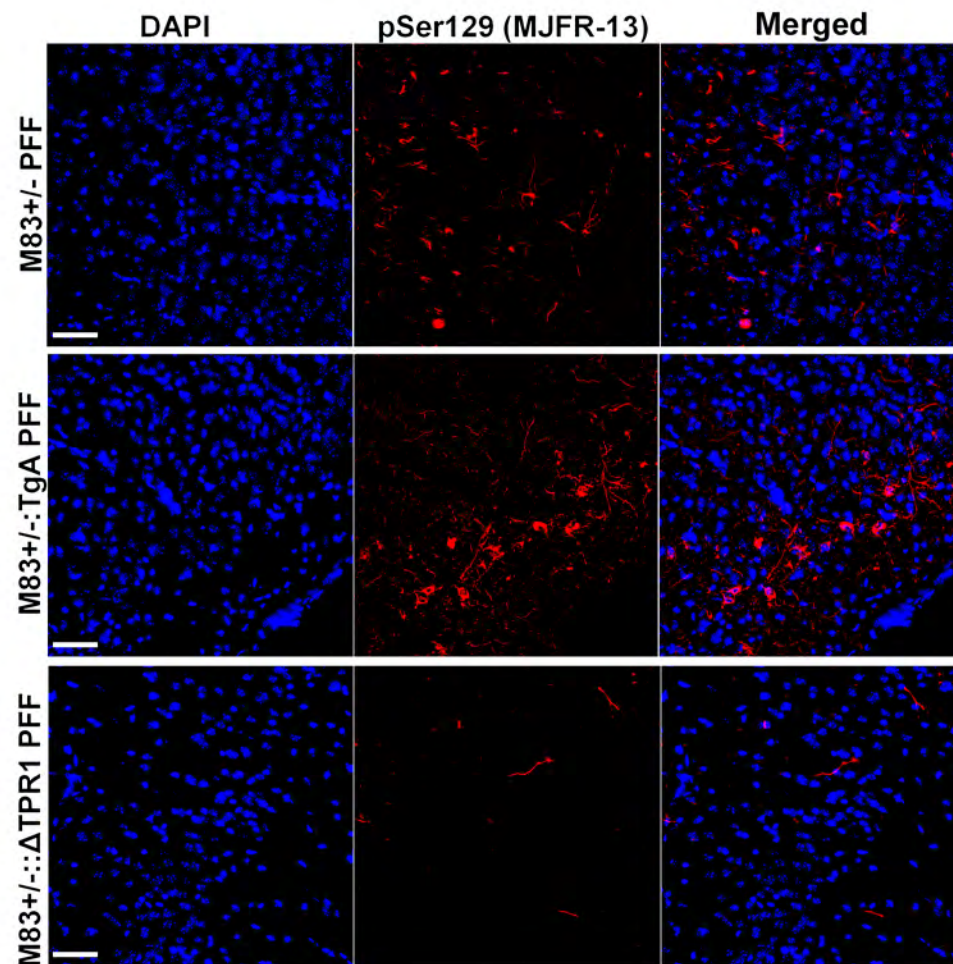

Fig. S5

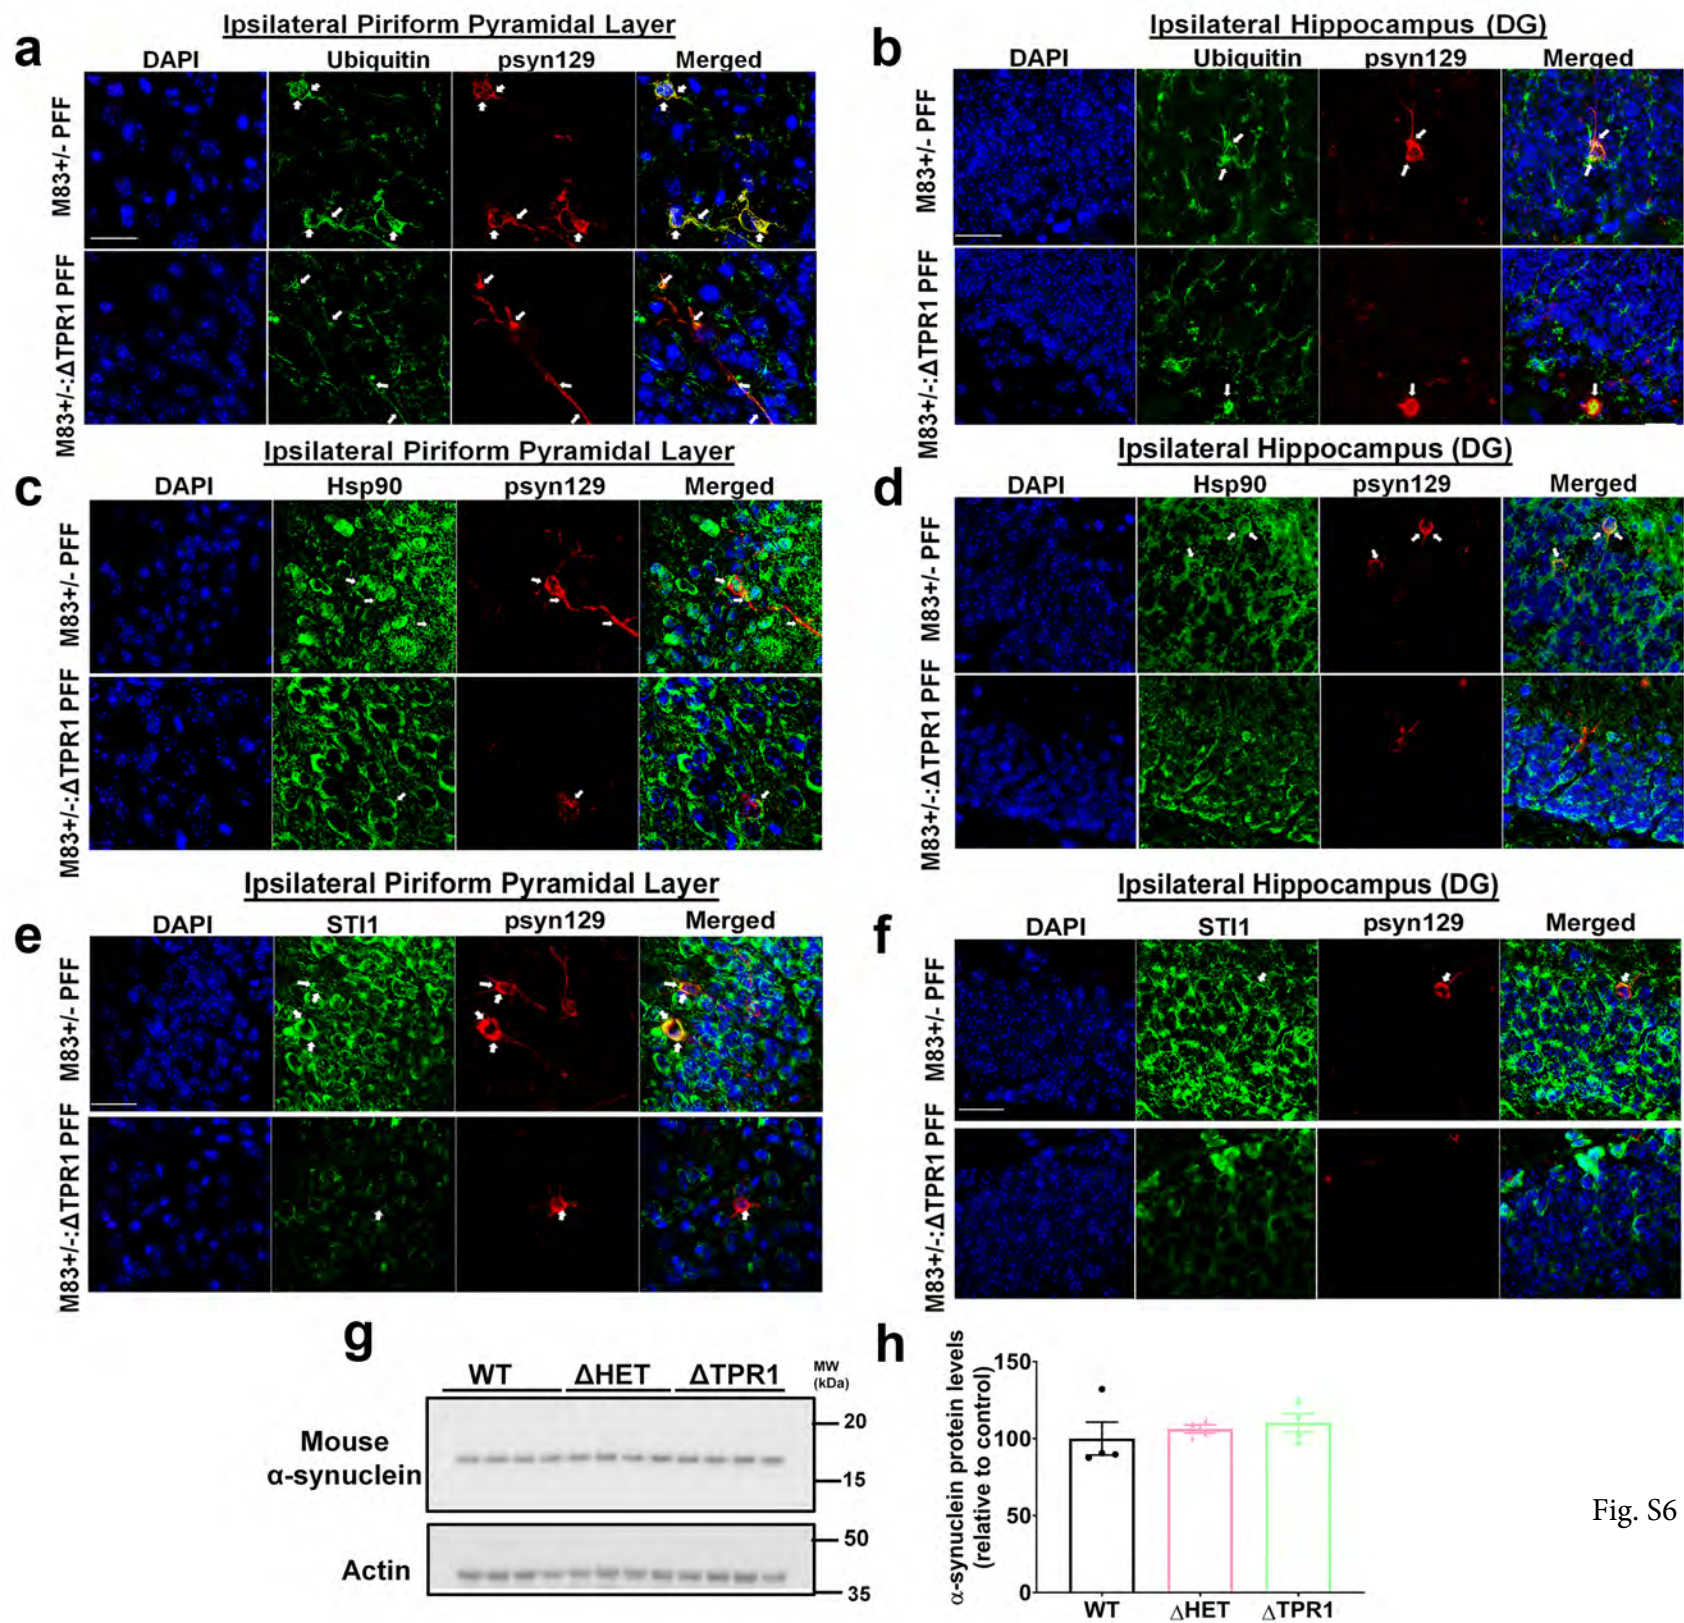

Fig. S6

**a**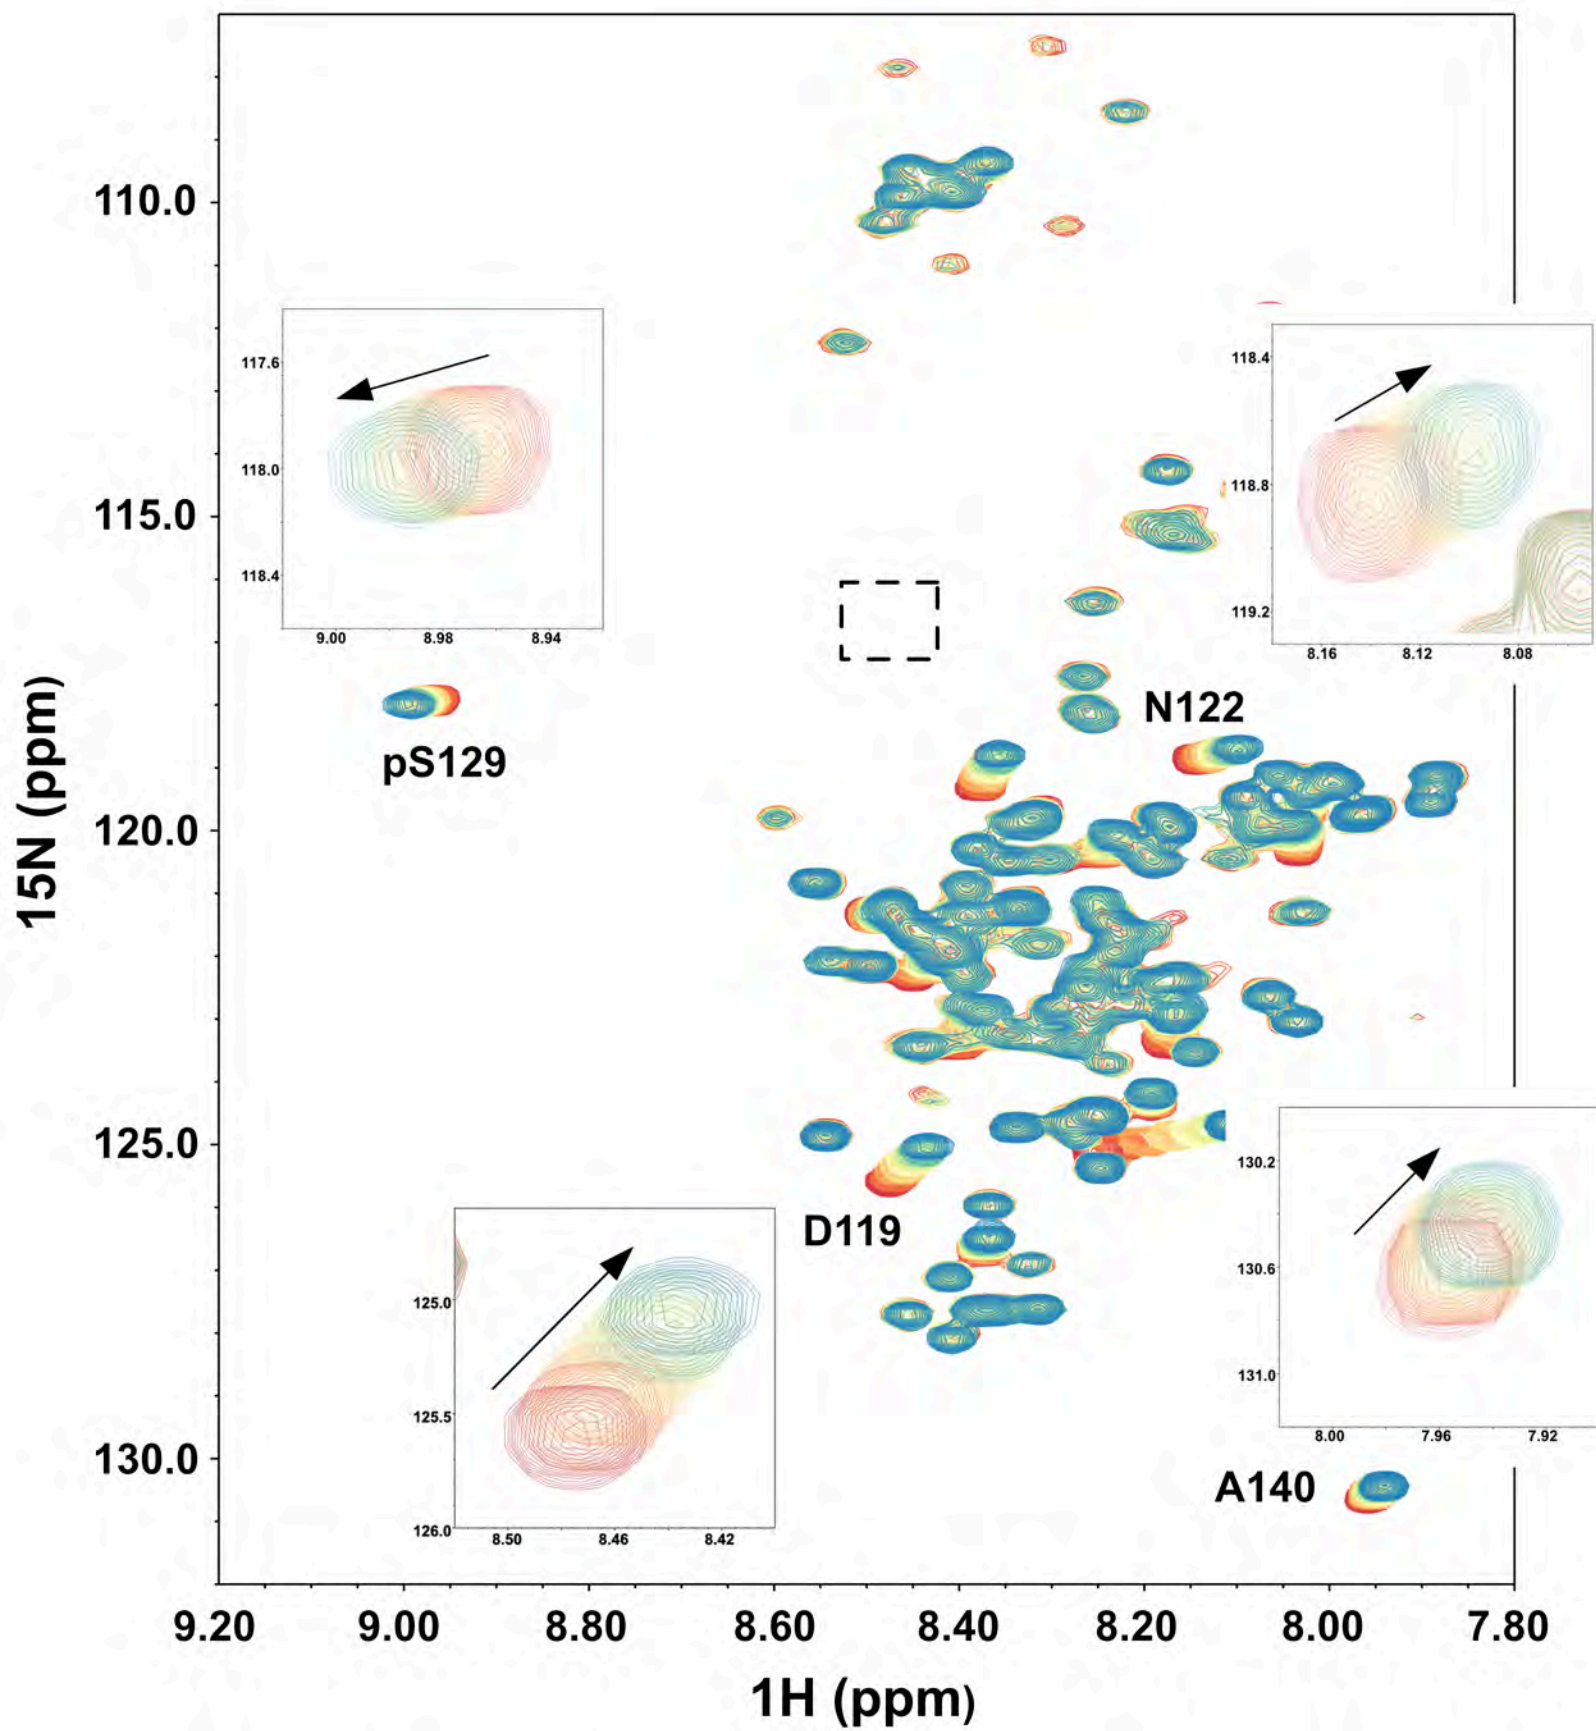

Fig. S7

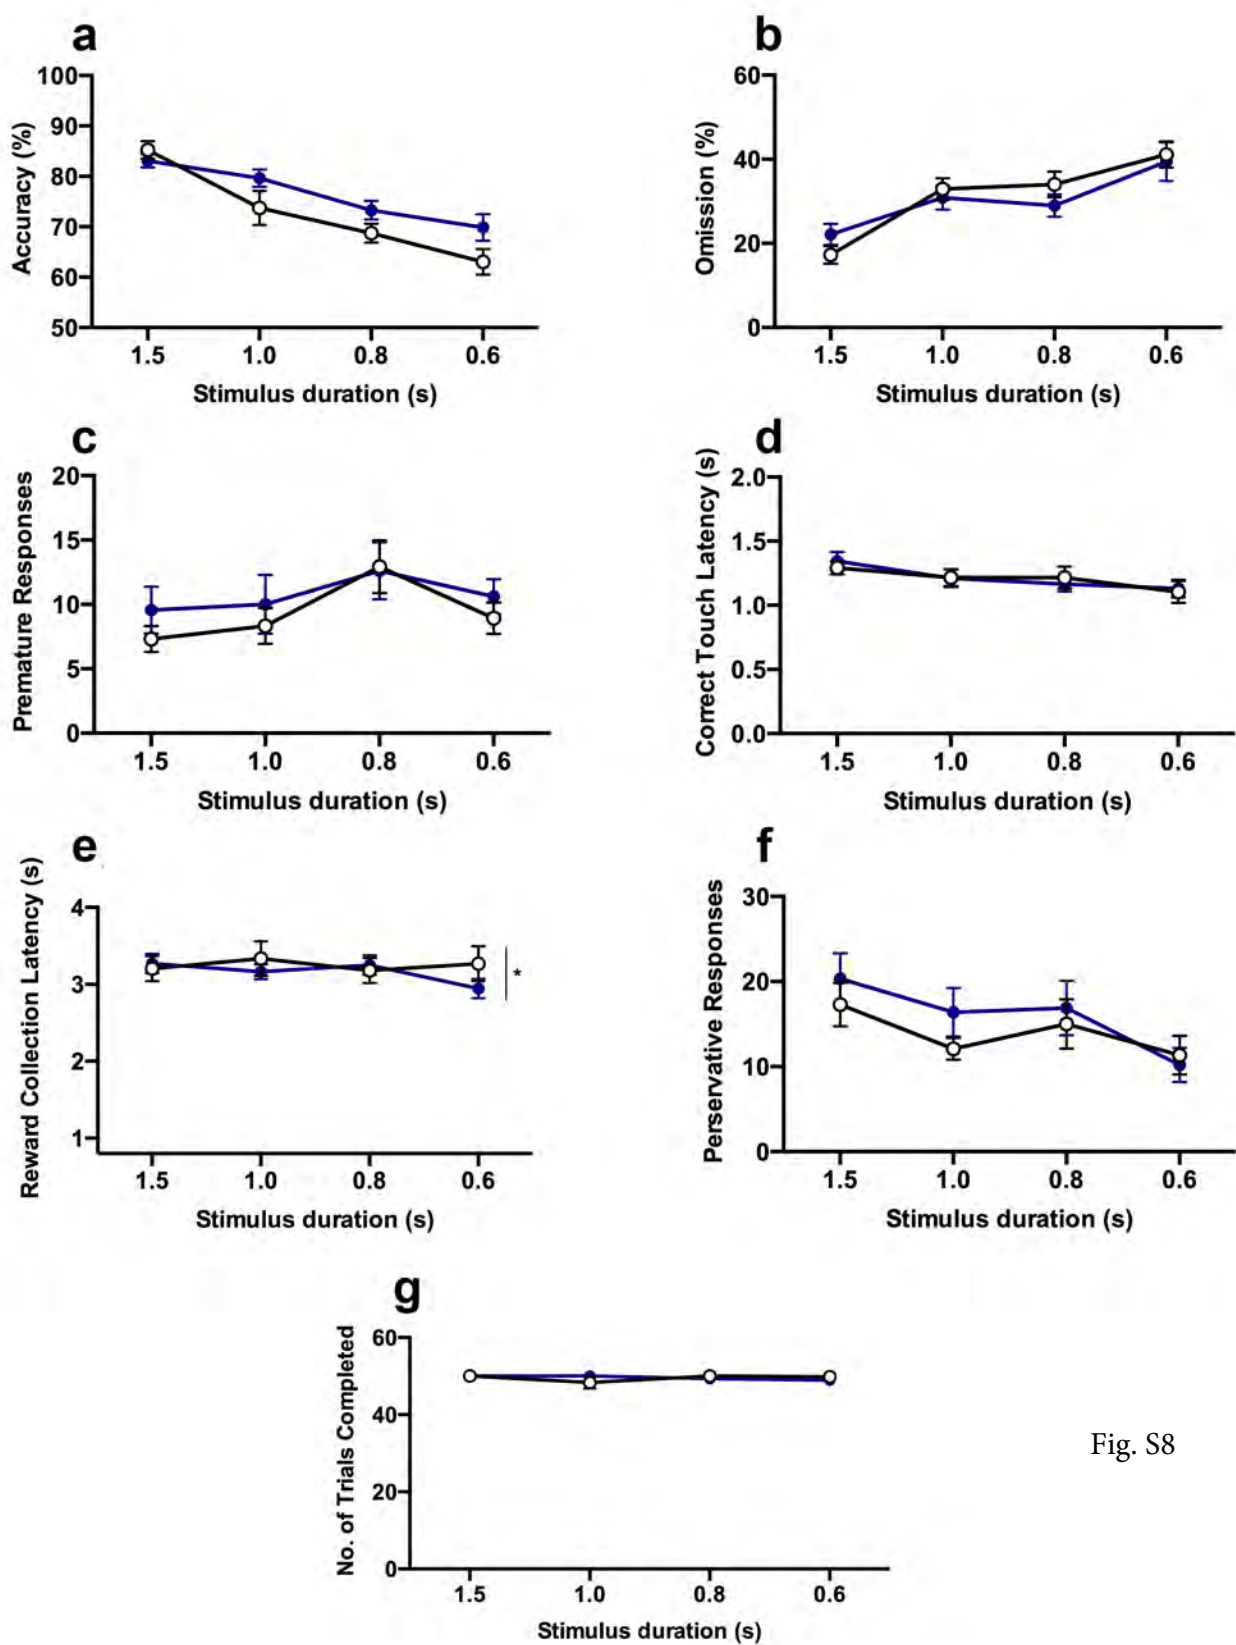

Fig. S8



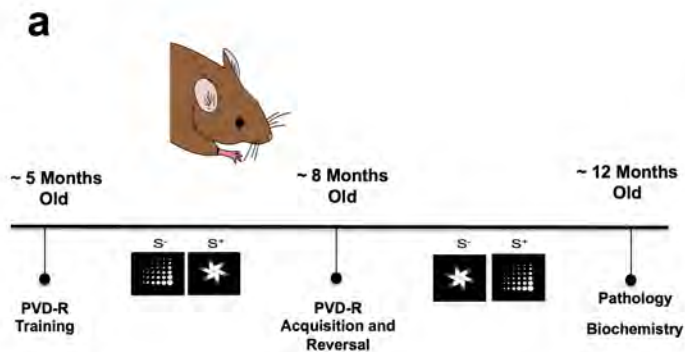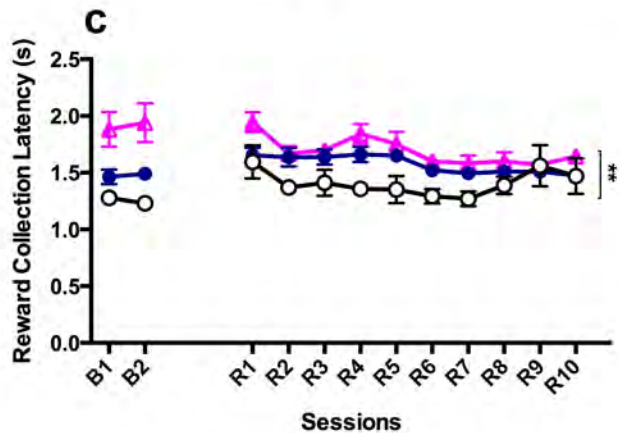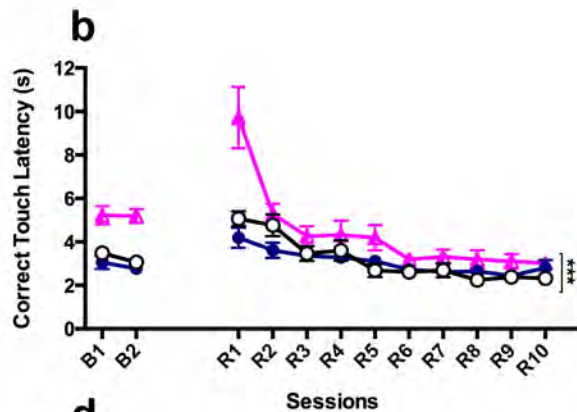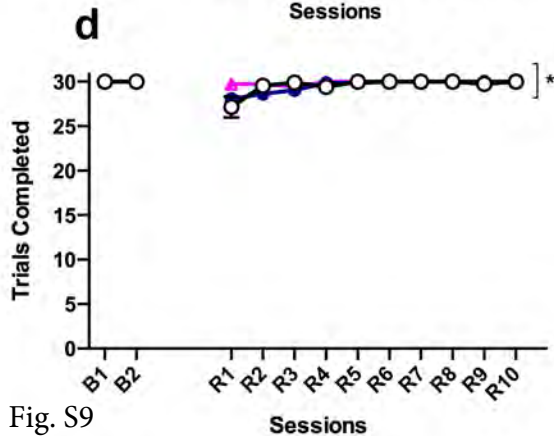

Fig. S9

Supplementary Table 1

| Sample | BrainID | Region   | Condition | LewyBodiesScore | Sex |
|--------|---------|----------|-----------|-----------------|-----|
| MTG6   | S03/254 | MTG      | Control   |                 | 0 M |
| MTG7   | S05/269 | MTG      | Control   |                 | 0 M |
| SN4    | S09/039 | SN       | Control   |                 | 0 M |
| Amy13  | S09/195 | Amygdala | Parkinson |                 | 5 M |
| SN12   | S09/195 | SN       | Parkinson |                 | 5 M |
| MTG1   | S10/109 | MTG      | Control   |                 | 0 F |
| MTG16  | S11/026 | MTG      | Parkinson |                 | 6 M |
| SN20   | S11/026 | SN       | Parkinson |                 | 6 M |
| Amy19  | S11/062 | Amygdala | Parkinson |                 | 6 M |
| MTG17  | S11/062 | MTG      | Parkinson |                 | 6 M |
| SN16   | S11/062 | SN       | Parkinson |                 | 6 M |
| Amy6   | S11/090 | Amygdala | Control   |                 | 0 F |
| MTG2   | S11/090 | MTG      | Control   |                 | 0 F |
| SN13   | S11/090 | SN       | Control   |                 | 0 F |
| Amy20  | S12/011 | Amygdala | Parkinson |                 | 4 M |
| MTG18  | S12/011 | MTG      | Parkinson |                 | 4 M |
| SN26   | S12/011 | SN       | Parkinson |                 | 4 M |
| Amy10  | S12/013 | Amygdala | Parkinson |                 | 6 M |
| MTG19  | S12/013 | MTG      | Parkinson |                 | 6 M |
| Amy3   | S12/042 | Amygdala | Control   |                 | 0 F |
| SN17   | S12/042 | SN       | Control   |                 | 0 F |
| Amy1   | S12/070 | Amygdala | Control   |                 | 0 M |
| Amy23  | S12/076 | Amygdala | Parkinson |                 | 6 F |
| MTG11  | S12/076 | MTG      | Parkinson |                 | 6 F |
| SN3    | S12/076 | SN       | Parkinson |                 | 6 F |
| Amy7   | S12/104 | Amygdala | Control   |                 | 0 M |
| Amy8   | S13/011 | Amygdala | Control   |                 | 0 F |
| MTG4   | S13/011 | MTG      | Control   |                 | 0 F |
| SN2    | S13/011 | SN       | Control   |                 | 0 F |
| SN6    | S13/016 | SN       | Control   |                 | 1 M |
| Amy15  | S13/027 | Amygdala | Parkinson |                 | 6 M |
| SN28   | S13/027 | SN       | Parkinson |                 | 6 M |
| SN7    | S13/041 | SN       | Parkinson |                 | 6 M |
| Amy5   | S13/056 | Amygdala | Control   |                 | 1 M |
| MTG8   | S13/056 | MTG      | Control   |                 | 1 M |
| SN24   | S13/056 | SN       | Control   |                 | 1 M |
| Amy18  | S13/086 | Amygdala | Parkinson |                 | 6 M |
| SN9    | S13/086 | SN       | Parkinson |                 | 6 M |
| MTG12  | S13/088 | MTG      | Parkinson |                 | 5 F |
| SN8    | S13/088 | SN       | Parkinson |                 | 5 F |
| MTG13  | S14/009 | MTG      | Parkinson |                 | 6 F |
| SN21   | S14/009 | SN       | Parkinson |                 | 6 F |
| Amy21  | S14/022 | Amygdala | Parkinson |                 | 6 M |
| MTG22  | S14/022 | MTG      | Parkinson |                 | 6 M |

|       |         |          |           |     |
|-------|---------|----------|-----------|-----|
| SN11  | S14/022 | SN       | Parkinson | 6 M |
| Amy16 | S14/032 | Amygdala | Parkinson | 6 M |
| MTG23 | S14/032 | MTG      | Parkinson | 6 M |
| SN23  | S14/032 | SN       | Parkinson | 6 M |
| MTG5  | S14/043 | MTG      | Control   | 0 F |
| Amy2  | S14/051 | Amygdala | Control   | 0 M |
| MTG9  | S14/051 | MTG      | Control   | 0 M |
| SN27  | S14/051 | SN       | Control   | 0 M |
| Amy9  | S14/076 | Amygdala | Parkinson | 6 M |
| SN15  | S14/076 | SN       | Parkinson | 6 M |
| SN14  | S92/001 | SN       | Control   | 0 M |

| Age | AgeGroup | PLengthYea | RIN |
|-----|----------|------------|-----|
| 82  | old      | 0          | 6.6 |
| 87  | old      | 0          | 6.4 |
| 78  | young    | 0          | 8.2 |
| 69  | young    | 6          | 6.8 |
| 69  | young    | 6          | 7.7 |
| 60  | young    | 0          | 6.8 |
| 77  | young    | 17         | 7.4 |
| 77  | young    | 17         | 7.1 |
| 65  | young    | 19         | 7.5 |
| 65  | young    | 19         | 8.2 |
| 65  | young    | 19         | 7.5 |
| 85  | old      | 0          | 7.8 |
| 85  | old      | 0          | 7.1 |
| 85  | old      | 0          | 7.6 |
| 73  | young    | 13         | 7.5 |
| 73  | young    | 13         | 7.8 |
| 73  | young    | 13         | 6.6 |
| 76  | young    | 18         | 6.5 |
| 76  | young    | 18         | 6.2 |
| 83  | old      | 0          | 6.7 |
| 83  | old      | 0          | 7.3 |
| 79  | young    | 0          | 6.1 |
| 81  | old      | 33         | 8.5 |
| 81  | old      | 33         | 7.2 |
| 81  | old      | 33         | 8.3 |
| 79  | young    | 0          | 8   |
| 92  | old      | 0          | 8.7 |
| 92  | old      | 0          | 8   |
| 92  | old      | 0          | 8.3 |
| 83  | old      | 0          | 8.1 |
| 76  | young    | 10         | 7.1 |
| 76  | young    | 10         | 6.5 |
| 70  | young    | 11         | 8.1 |
| 95  | old      | 0          | 7.6 |
| 95  | old      | 0          | 7.1 |
| 95  | old      | 0          | 6.8 |
| 81  | old      | 8          | 7.4 |
| 81  | old      | 8          | 7.9 |
| 71  | young    | 14         | 6.9 |
| 71  | young    | 14         | 8   |
| 83  | old      | 22         | 6.4 |
| 83  | old      | 22         | 7   |
| 77  | young    | 18         | 7.8 |
| 77  | young    | 18         | 7.5 |

|          |    |     |
|----------|----|-----|
| 77 young | 18 | 7.9 |
| 83 old   | 15 | 7.1 |
| 83 old   | 15 | 6.8 |
| 83 old   | 15 | 6.9 |
| 60 young | 0  | 7.5 |
| 92 old   | 0  | 6.5 |
| 92 old   | 0  | 7.1 |
| 92 old   | 0  | 6.5 |
| 78 young | 17 | 6.1 |
| 78 young | 17 | 7.6 |
| 83 old   | 0  | 7.6 |

Supplementary Table 2

| Sample                       | SubjectID  | Region        | Sex    |
|------------------------------|------------|---------------|--------|
| GTEX.1117F.3226.SM.5N9CT     | GTEX-1117F | Cortex        | Female |
| GTEX.111FC.3126.SM.5GZZ2     | GTEX-111FC | Cortex        | Male   |
| GTEX.1128S.2726.SM.5H12C     | GTEX-1128S | Cortex        | Female |
| GTEX.117XS.3026.SM.5N9CA     | GTEX-117XS | Cortex        | Male   |
| GTEX.1192X.3126.SM.5N9BY     | GTEX-1192X | Cortex        | Male   |
| GTEX.11DXY.3226.SM.5GIDE     | GTEX-11DXY | Cortex        | Male   |
| GTEX.11EI6.3026.SM.5GZZO     | GTEX-11EI6 | Cortex        | Male   |
| GTEX.11EMC.3226.SM.5EGKW     | GTEX-11EMC | Cortex        | Female |
| GTEX.11GS4.2326.SM.5A5KS     | GTEX-11GS4 | Cortex        | Male   |
| GTEX.11GS4.3126.SM.5A5LH     | GTEX-11GS4 | Cortex        | Male   |
| GTEX.11GSO.2926.SM.5HL73     | GTEX-11GSO | Cortex        | Male   |
| GTEX.11GSO.0011.R2a.SM.57WDF | GTEX-11GSO | Substantia ni | Male   |
| GTEX.11GSP.0011.R7b.SM.57WC3 | GTEX-11GSP | Putamen       | Female |
| GTEX.11GSP.3226.SM.5986O     | GTEX-11GSP | Cortex        | Female |
| GTEX.11NUK.2926.SM.5A5MD     | GTEX-11NUK | Cortex        | Male   |
| GTEX.11NV4.0011.R7a.SM.57WDH | GTEX-11NV4 | Putamen       | Male   |
| GTEX.11NV4.2126.SM.5N9DS     | GTEX-11NV4 | Cortex        | Male   |
| GTEX.11PRG.2926.SM.5987A     | GTEX-11PRG | Cortex        | Male   |
| GTEX.11PRG.0011.R2a.SM.69LQ5 | GTEX-11PRG | Substantia ni | Male   |
| GTEX.11TTK.1926.SM.5PNW8     | GTEX-11TTK | Cortex        | Female |
| GTEX.11TTK.2926.SM.5PNYP     | GTEX-11TTK | Cortex        | Female |
| GTEX.11UD1.0011.R2b.SM.5BC6O | GTEX-11UD1 | Substantia ni | Female |
| GTEX.11WQC.0011.R7b.SM.5BC7A | GTEX-11WQC | Putamen       | Male   |
| GTEX.11WQK.3026.SM.5EQL6     | GTEX-11WQK | Cortex        | Male   |
| GTEX.11ZTS.0011.R2b.SM.5BC75 | GTEX-11ZTS | Substantia ni | Female |
| GTEX.11ZUS.2926.SM.5FQSL     | GTEX-11ZUS | Cortex        | Male   |
| GTEX.11ZVC.0011.R4a.SM.5BC6Z | GTEX-11ZVC | Amygdala      | Female |
| GTEX.12126.1026.SM.5P9JJ     | GTEX-12126 | Cortex        | Male   |
| GTEX.12WSA.0011.R2a.SM.57WDK | GTEX-12WSA | Substantia ni | Male   |
| GTEX.12WSA.0011.R4a.SM.57WB7 | GTEX-12WSA | Amygdala      | Male   |
| GTEX.12WSA.0011.R7b.SM.5GU5U | GTEX-12WSA | Putamen       | Male   |
| GTEX.12WSA.2926.SM.5EQ4D     | GTEX-12WSA | Cortex        | Male   |
| GTEX.12WSD.0011.R4b.SM.5LZUA | GTEX-12WSD | Amygdala      | Female |
| GTEX.12WSD.3126.SM.5HL7P     | GTEX-12WSD | Cortex        | Female |
| GTEX.12WSD.0011.R2a.SM.5LZWB | GTEX-12WSD | Substantia ni | Female |
| GTEX.12WSD.0011.R7b.SM.5PNWE | GTEX-12WSD | Putamen       | Female |
| GTEX.12WSE.0011.R7a.SM.5PNWF | GTEX-12WSE | Putamen       | Male   |
| GTEX.12WSF.0011.R7b.SM.5HL99 | GTEX-12WSF | Putamen       | Male   |
| GTEX.12WSF.3126.SM.6M478     | GTEX-12WSF | Cortex        | Male   |
| GTEX.12WSF.0011.R2a.SM.5DUVU | GTEX-12WSF | Substantia ni | Male   |
| GTEX.12WSF.0011.R4b.SM.5HL88 | GTEX-12WSF | Amygdala      | Male   |
| GTEX.12WSG.0826.SM.5EQ5A     | GTEX-12WSG | Cortex        | Female |

|                              |            |               |        |
|------------------------------|------------|---------------|--------|
| GTEX.12WSH.0011.R2a.SM.5GU68 | GTEX-12WSH | Substantia ni | Male   |
| GTEX.12WSH.0011.R4a.SM.5GU6K | GTEX-12WSH | Amygdala      | Male   |
| GTEX.12WSH.3026.SM.5CVNI     | GTEX-12WSH | Cortex        | Male   |
| GTEX.12WSI.0011.R7b.SM.5GU78 | GTEX-12WSI | Putamen       | Male   |
| GTEX.12WSM.0011.R7b.SM.5EGLD | GTEX-12WSM | Putamen       | Male   |
| GTEX.12ZZW.0011.R4a.SM.5DUX9 | GTEX-12ZZW | Amygdala      | Male   |
| GTEX.12ZZW.0011.R7a.SM.5DUWC | GTEX-12ZZW | Putamen       | Male   |
| GTEX.12ZZW.2926.SM.5LZUP     | GTEX-12ZZW | Cortex        | Male   |
| GTEX.12ZZX.0011.R2a.SM.5EGLG | GTEX-12ZZX | Substantia ni | Female |
| GTEX.12ZZX.0011.R7b.SM.5DUVV | GTEX-12ZZX | Putamen       | Female |
| GTEX.12ZZX.2926.SM.5GCOQ     | GTEX-12ZZX | Cortex        | Female |
| GTEX.12ZZY.0011.R7a.SM.5EGLB | GTEX-12ZZY | Putamen       | Male   |
| GTEX.12ZZY.3026.SM.5GCOU     | GTEX-12ZZY | Cortex        | Male   |
| GTEX.12ZZZ.0011.R7b.SM.5EGLE | GTEX-12ZZZ | Putamen       | Male   |
| GTEX.12ZZZ.0011.R4b.SM.5DUV7 | GTEX-12ZZZ | Amygdala      | Male   |
| GTEX.12ZZZ.3026.SM.5BC67     | GTEX-12ZZZ | Cortex        | Male   |
| GTEX.13112.0011.R7b.SM.5DUVW | GTEX-13112 | Putamen       | Male   |
| GTEX.13112.0011.R4b.SM.5DUXL | GTEX-13112 | Amygdala      | Male   |
| GTEX.13112.2126.SM.5GCO4     | GTEX-13112 | Cortex        | Male   |
| GTEX.1313W.0011.R4b.SM.5KLZV | GTEX-1313W | Amygdala      | Female |
| GTEX.1313W.0011.R7b.SM.5DUWL | GTEX-1313W | Putamen       | Female |
| GTEX.1313W.3126.SM.5LZUI     | GTEX-1313W | Cortex        | Female |
| GTEX.1313W.0011.R2a.SM.5EGLF | GTEX-1313W | Substantia ni | Female |
| GTEX.131XH.0011.R4b.SM.5DUWB | GTEX-131XH | Amygdala      | Male   |
| GTEX.131XH.0011.R2b.SM.5DUVY | GTEX-131XH | Substantia ni | Male   |
| GTEX.131XW.3126.SM.5LZUC     | GTEX-131XW | Cortex        | Female |
| GTEX.131YS.0011.R4a.SM.5DUVL | GTEX-131YS | Amygdala      | Female |
| GTEX.131YS.3126.SM.5KLYT     | GTEX-131YS | Cortex        | Female |
| GTEX.131YS.0011.R7a.SM.5IJDA | GTEX-131YS | Putamen       | Female |
| GTEX.132Q8.0011.R7b.SM.5N9F1 | GTEX-132Q8 | Putamen       | Male   |
| GTEX.132Q8.0011.R2b.SM.5EQ5Z | GTEX-132Q8 | Substantia ni | Male   |
| GTEX.132Q8.3026.SM.5PNVG     | GTEX-132Q8 | Cortex        | Male   |
| GTEX.139TT.0011.R7b.SM.5J2MN | GTEX-139TT | Putamen       | Male   |
| GTEX.13CF2.0011.R7b.SM.5K7UV | GTEX-13CF2 | Putamen       | Male   |
| GTEX.13CF2.0011.R2a.SM.5L3DC | GTEX-13CF2 | Substantia ni | Male   |
| GTEX.13CZV.0011.R4b.SM.5J2NY | GTEX-13CZV | Amygdala      | Male   |
| GTEX.13CZV.0011.R7b.SM.5LZXH | GTEX-13CZV | Putamen       | Male   |
| GTEX.13FHO.0011.R7b.SM.5LZXD | GTEX-13FHO | Putamen       | Male   |
| GTEX.13FHO.3026.SM.5J1O9     | GTEX-13FHO | Cortex        | Male   |
| GTEX.13FHP.0011.R7b.SM.5LZYI | GTEX-13FHP | Putamen       | Male   |
| GTEX.13FHP.3026.SM.5IJBS     | GTEX-13FHP | Cortex        | Male   |
| GTEX.13FLV.0011.R7b.SM.5K7WW | GTEX-13FLV | Putamen       | Male   |
| GTEX.13FLV.0011.R4a.SM.5LZYU | GTEX-13FLV | Amygdala      | Male   |

|                              |            |               |        |
|------------------------------|------------|---------------|--------|
| GTEX.13FLW.1426.SM.5K7YE     | GTEX-13FLW | Cortex        | Male   |
| GTEX.13FLW.0011.R7b.SM.5L3EZ | GTEX-13FLW | Putamen       | Male   |
| GTEX.13FXS.0011.R2b.SM.5K7XX | GTEX-13FXS | Substantia ni | Male   |
| GTEX.13FXS.0011.R7a.SM.5L3FC | GTEX-13FXS | Putamen       | Male   |
| GTEX.13FXS.3126.SM.5J2NN     | GTEX-13FXS | Cortex        | Male   |
| GTEX.13G51.0011.R2b.SM.5LZXS | GTEX-13G51 | Substantia ni | Male   |
| GTEX.13G51.0011.R7b.SM.5LZXG | GTEX-13G51 | Putamen       | Male   |
| GTEX.13IVO.2926.SM.5L3CZ     | GTEX-13IVO | Cortex        | Male   |
| GTEX.13JUV.0011.R7b.SM.5LZZG | GTEX-13JUV | Putamen       | Female |
| GTEX.13JUV.2926.SM.5LZX7     | GTEX-13JUV | Cortex        | Female |
| GTEX.13JVG.3126.SM.5L3FH     | GTEX-13JVG | Cortex        | Male   |
| GTEX.13JVG.0011.R4a.SM.5MR4C | GTEX-13JVG | Amygdala      | Male   |
| GTEX.13JVG.0011.R7b.SM.5MR3Q | GTEX-13JVG | Putamen       | Male   |
| GTEX.13N2G.0011.R2a.SM.5MR4Q | GTEX-13N2G | Substantia ni | Male   |
| GTEX.13N2G.0011.R4b.SM.5MR54 | GTEX-13N2G | Amygdala      | Male   |
| GTEX.13N2G.0011.R7a.SM.5MR42 | GTEX-13N2G | Putamen       | Male   |
| GTEX.13NYB.1726.SM.5N9G2     | GTEX-13NYB | Cortex        | Male   |
| GTEX.13NYB.3026.SM.5IJD7     | GTEX-13NYB | Cortex        | Male   |
| GTEX.13NYB.0011.R2a.SM.5MR3C | GTEX-13NYB | Substantia ni | Male   |
| GTEX.13NYB.0011.R7a.SM.5MR5D | GTEX-13NYB | Putamen       | Male   |
| GTEX.13NYC.2826.SM.5K7WR     | GTEX-13NYC | Cortex        | Male   |
| GTEX.13NYS.0011.R4b.SM.5MR3O | GTEX-13NYS | Amygdala      | Male   |
| GTEX.13NYS.3126.SM.5KLYV     | GTEX-13NYS | Cortex        | Male   |
| GTEX.13NYS.0011.R2b.SM.5MR4G | GTEX-13NYS | Substantia ni | Male   |
| GTEX.13O1R.2526.SM.5N9FW     | GTEX-13O1R | Cortex        | Male   |
| GTEX.13O3O.0011.R4b.SM.5KM3F | GTEX-13O3O | Amygdala      | Female |
| GTEX.13O3O.3126.SM.5KM3H     | GTEX-13O3O | Cortex        | Female |
| GTEX.13O3O.0011.R7b.SM.5P9GZ | GTEX-13O3O | Putamen       | Female |
| GTEX.13O3O.0011.R2b.SM.5P9H1 | GTEX-13O3O | Substantia ni | Female |
| GTEX.13O3Q.0011.R4a.SM.5P9H2 | GTEX-13O3Q | Amygdala      | Male   |
| GTEX.13O3Q.2926.SM.5KM45     | GTEX-13O3Q | Cortex        | Male   |
| GTEX.13O3Q.0011.R7a.SM.5KM38 | GTEX-13O3Q | Putamen       | Male   |
| GTEX.13O3Q.0011.R2b.SM.5KM3K | GTEX-13O3Q | Substantia ni | Male   |
| GTEX.13OVH.0011.R4a.SM.5KM3W | GTEX-13OVH | Amygdala      | Male   |
| GTEX.13OVH.3026.SM.5MR4N     | GTEX-13OVH | Cortex        | Male   |
| GTEX.13OVI.1126.SM.5KLZF     | GTEX-13OVI | Cortex        | Female |
| GTEX.13OVJ.0011.R2b.SM.5L3GP | GTEX-13OVJ | Substantia ni | Female |
| GTEX.13OVJ.0011.R7a.SM.5L3G1 | GTEX-13OVJ | Putamen       | Female |
| GTEX.13OVJ.0011.R4b.SM.5P9H5 | GTEX-13OVJ | Amygdala      | Female |
| GTEX.13OVJ.2826.SM.5L3GW     | GTEX-13OVJ | Cortex        | Female |
| GTEX.13OVL.0011.R7a.SM.5P9GW | GTEX-13OVL | Putamen       | Male   |
| GTEX.13OVL.1826.SM.5KLZR     | GTEX-13OVL | Cortex        | Male   |
| GTEX.13OVL.0011.R4b.SM.5L3HV | GTEX-13OVL | Amygdala      | Male   |



|                              |            |               |        |
|------------------------------|------------|---------------|--------|
| GTEX.13OW5.0011.R7a.SM.5O9C9 | GTEX-13OW5 | Putamen       | Male   |
| GTEX.13OW5.0011.R4b.SM.5L3HS | GTEX-13OW5 | Amygdala      | Male   |
| GTEX.13OW6.0011.R2a.SM.5L3HG | GTEX-13OW6 | Substantia ni | Male   |
| GTEX.13OW6.0011.R7b.SM.5L3H4 | GTEX-13OW6 | Putamen       | Male   |
| GTEX.13OW6.1826.SM.5N9F9     | GTEX-13OW6 | Cortex        | Male   |
| GTEX.13OW6.0011.R4a.SM.5O9DX | GTEX-13OW6 | Amygdala      | Male   |
| GTEX.13OW6.3026.SM.5J2MI     | GTEX-13OW6 | Cortex        | Male   |
| GTEX.13OW7.0011.R4b.SM.5O9CX | GTEX-13OW7 | Amygdala      | Male   |
| GTEX.13OW7.3026.SM.5L3GY     | GTEX-13OW7 | Cortex        | Male   |
| GTEX.13OW8.2826.SM.5L3GC     | GTEX-13OW8 | Cortex        | Male   |
| GTEX.13OW8.0011.R7a.SM.5L3FP | GTEX-13OW8 | Putamen       | Male   |
| GTEX.13OW8.0011.R2a.SM.5L3G2 | GTEX-13OW8 | Substantia ni | Male   |
| GTEX.13PL6.3126.SM.5LUAR     | GTEX-13PL6 | Cortex        | Female |
| GTEX.13PVQ.3026.SM.5SI93     | GTEX-13PVQ | Cortex        | Male   |
| GTEX.13PVQ.0011.R4a.SM.5O9CT | GTEX-13PVQ | Amygdala      | Male   |
| GTEX.13PVQ.0011.R7a.SM.5L3G3 | GTEX-13PVQ | Putamen       | Male   |
| GTEX.13QIC.2926.SM.5J2NF     | GTEX-13QIC | Cortex        | Female |
| GTEX.13QIC.0011.R4a.SM.5PNX8 | GTEX-13QIC | Amygdala      | Female |
| GTEX.13QJC.0011.R7b.SM.5PNUM | GTEX-13QJC | Putamen       | Female |
| GTEX.13QJC.0011.R2b.SM.5PNUN | GTEX-13QJC | Substantia ni | Female |
| GTEX.13RTJ.2226.SM.5S2Q1     | GTEX-13RTJ | Cortex        | Male   |
| GTEX.13RTJ.0011.R7b.SM.5P9JS | GTEX-13RTJ | Putamen       | Male   |
| GTEX.13RTJ.0011.R4b.SM.5PNX1 | GTEX-13RTJ | Amygdala      | Male   |
| GTEX.13RTJ.0011.R2a.SM.5PNW9 | GTEX-13RTJ | Substantia ni | Male   |
| GTEX.13S7M.0011.R7a.SM.5O9DK | GTEX-13S7M | Putamen       | Female |
| GTEX.13S7M.3126.SM.5RQJQ     | GTEX-13S7M | Cortex        | Female |
| GTEX.13SLW.0011.R2b.SM.5O9C6 | GTEX-13SLW | Substantia ni | Male   |
| GTEX.13SLW.0011.R4b.SM.5S2W2 | GTEX-13SLW | Amygdala      | Male   |
| GTEX.13SLX.0011.R4a.SM.5O9BJ | GTEX-13SLX | Amygdala      | Female |
| GTEX.13SLX.0011.R2b.SM.5S2VP | GTEX-13SLX | Substantia ni | Female |
| GTEX.13SLX.3126.SM.5S2Q5     | GTEX-13SLX | Cortex        | Female |
| GTEX.13VXU.0011.R4b.SM.5O9CI | GTEX-13VXU | Amygdala      | Male   |
| GTEX.13VXU.0011.R7b.SM.5SI72 | GTEX-13VXU | Putamen       | Male   |
| GTEX.13VXU.2926.SM.5LU5C     | GTEX-13VXU | Cortex        | Male   |
| GTEX.13X6I.0011.R4b.SM.5PNU9 | GTEX-13X6I | Amygdala      | Male   |
| GTEX.13X6I.0011.R2b.SM.5PNWQ | GTEX-13X6I | Substantia ni | Male   |
| GTEX.13X6I.0011.R7b.SM.5PNWP | GTEX-13X6I | Putamen       | Male   |
| GTEX.13X6J.0011.R7b.SM.5PNUC | GTEX-13X6J | Putamen       | Male   |
| GTEX.13X6J.3026.SM.5Q5CU     | GTEX-13X6J | Cortex        | Male   |
| GTEX.13X6J.0011.R4b.SM.5P9K4 | GTEX-13X6J | Amygdala      | Male   |
| GTEX.13X6K.0011.R4b.SM.5P9HO | GTEX-13X6K | Amygdala      | Female |
| GTEX.13X6K.0011.R2b.SM.5P9K3 | GTEX-13X6K | Substantia ni | Female |
| GTEX.13X6K.0011.R7b.SM.5P9K7 | GTEX-13X6K | Putamen       | Female |

|                              |            |               |        |
|------------------------------|------------|---------------|--------|
| GTEX.13X6K.2926.SM.5Q5D5     | GTEX-13X6K | Cortex        | Female |
| GTEX.145MF.2726.SM.5O995     | GTEX-145MF | Cortex        | Male   |
| GTEX.145MG.3026.SM.5RQJA     | GTEX-145MG | Cortex        | Male   |
| GTEX.145MG.0011.R7b.SM.5P9JY | GTEX-145MG | Putamen       | Male   |
| GTEX.145MH.3026.SM.5Q5DZ     | GTEX-145MH | Cortex        | Male   |
| GTEX.145MH.0011.R7a.SM.5PNWH | GTEX-145MH | Putamen       | Male   |
| GTEX.145MI.0011.R4b.SM.5PNZH | GTEX-145MI | Amygdala      | Female |
| GTEX.145MN.0326.SM.5QGQI     | GTEX-145MN | Cortex        | Male   |
| GTEX.147F4.2626.SM.5Q5CS     | GTEX-147F4 | Cortex        | Male   |
| GTEX.147GR.0011.R4a.SM.5S2V2 | GTEX-147GR | Amygdala      | Male   |
| GTEX.147GR.0011.R7a.SM.5S2RP | GTEX-147GR | Putamen       | Male   |
| GTEX.147GR.3026.SM.5S2ML     | GTEX-147GR | Cortex        | Male   |
| GTEX.147GR.0011.R2b.SM.5S2RQ | GTEX-147GR | Substantia ni | Male   |
| GTEX.1497J.0826.SM.5NQAJ     | GTEX-1497J | Cortex        | Male   |
| GTEX.14A5I.2926.SM.5Q5CQ     | GTEX-14A5I | Cortex        | Female |
| GTEX.14ABY.0011.R4b.SM.5S2VN | GTEX-14ABY | Amygdala      | Male   |
| GTEX.14ABY.0011.R7b.SM.5PNWS | GTEX-14ABY | Putamen       | Male   |
| GTEX.14ASI.0011.R2b.SM.5YY9H | GTEX-14ASI | Substantia ni | Male   |
| GTEX.14ASI.0011.R4a.SM.69LQ4 | GTEX-14ASI | Amygdala      | Male   |
| GTEX.14ASI.3026.SM.5S2PN     | GTEX-14ASI | Cortex        | Male   |
| GTEX.14ASI.0011.R7b.SM.5YY9G | GTEX-14ASI | Putamen       | Male   |
| GTEX.14BIL.3026.SM.7EWD4     | GTEX-14BIL | Cortex        | Male   |
| GTEX.14BIM.0011.R2b.SM.69LQ6 | GTEX-14BIM | Substantia ni | Female |
| GTEX.14BIM.0011.R4b.SM.5S2RK | GTEX-14BIM | Amygdala      | Female |
| GTEX.14BIM.3026.SM.7EWCY     | GTEX-14BIM | Cortex        | Female |
| GTEX.14BIN.0011.R2a.SM.5S2RJ | GTEX-14BIN | Substantia ni | Female |
| GTEX.14BIN.0011.R7b.SM.5S2RI | GTEX-14BIN | Putamen       | Female |
| GTEX.14BIN.3226.SM.62LDR     | GTEX-14BIN | Cortex        | Female |
| GTEX.14BMV.0011.R7b.SM.5YY9J | GTEX-14BMV | Putamen       | Male   |
| GTEX.14BMV.3026.SM.5S2PQ     | GTEX-14BMV | Cortex        | Male   |
| GTEX.14C39.3126.SM.5ZZW6     | GTEX-14C39 | Cortex        | Male   |
| GTEX.14C39.2126.SM.664OH     | GTEX-14C39 | Cortex        | Male   |
| GTEX.14C5O.0011.R7b.SM.5YYAH | GTEX-14C5O | Putamen       | Male   |
| GTEX.14C5O.0011.R2a.SM.5ZZV2 | GTEX-14C5O | Substantia ni | Male   |
| GTEX.14C5O.3026.SM.5YYB2     | GTEX-14C5O | Cortex        | Male   |
| GTEX.14C5O.2026.SM.5YYB1     | GTEX-14C5O | Cortex        | Male   |
| GTEX.14DAQ.0011.R4a.SM.5YYAI | GTEX-14DAQ | Amygdala      | Female |
| GTEX.14DAQ.3126.SM.62LDS     | GTEX-14DAQ | Cortex        | Female |
| GTEX.14E6D.2526.SM.5YYA9     | GTEX-14E6D | Cortex        | Male   |
| GTEX.14E7W.0011.R4b.SM.62LEA | GTEX-14E7W | Amygdala      | Male   |
| GTEX.14E7W.0011.R7b.SM.5ZZV4 | GTEX-14E7W | Putamen       | Male   |
| GTEX.14JG1.0011.R4b.SM.62LEB | GTEX-14JG1 | Amygdala      | Male   |
| GTEX.14JG1.0011.R2a.SM.5ZZVE | GTEX-14JG1 | Substantia ni | Male   |

|                              |            |               |        |
|------------------------------|------------|---------------|--------|
| GTEX.14JG1.3026.SM.5YYAA     | GTEX-14JG1 | Cortex        | Male   |
| GTEX.14JG1.0011.R7b.SM.5YYAV | GTEX-14JG1 | Putamen       | Male   |
| GTEX.14JIY.0011.R4b.SM.5ZZV7 | GTEX-14JIY | Amygdala      | Male   |
| GTEX.14JIY.2926.SM.69LPT     | GTEX-14JIY | Cortex        | Male   |
| GTEX.14LZ3.3026.SM.5ZZVU     | GTEX-14LZ3 | Cortex        | Female |
| GTEX.14LZ3.0011.R7a.SM.69LQN | GTEX-14LZ3 | Putamen       | Female |
| GTEX.14PJM.0011.R7a.SM.6AJBX | GTEX-14PJM | Putamen       | Female |
| GTEX.14PJM.3126.SM.6EU2R     | GTEX-14PJM | Cortex        | Female |
| GTEX.14PJM.0011.R4a.SM.5YYAS | GTEX-14PJM | Amygdala      | Female |
| GTEX.14PJO.0011.R2a.SM.5ZZVF | GTEX-14PJO | Substantia ni | Male   |
| GTEX.14PJO.0011.R7a.SM.664NR | GTEX-14PJO | Putamen       | Male   |
| GTEX.14PN4.0011.R4a.SM.686ZT | GTEX-14PN4 | Amygdala      | Male   |
| GTEX.14PN4.0011.R7b.SM.69LQQ | GTEX-14PN4 | Putamen       | Male   |
| GTEX.14PN4.0011.R2a.SM.6EU2Y | GTEX-14PN4 | Substantia ni | Male   |
| GTEX.14PQA.0011.R4b.SM.6AJBU | GTEX-14PQA | Amygdala      | Female |
| GTEX.15CHQ.0011.R2b.SM.6AJAD | GTEX-15CHQ | Substantia ni | Male   |
| GTEX.15CHQ.0011.R4a.SM.686ZX | GTEX-15CHQ | Amygdala      | Male   |
| GTEX.15CHQ.2126.SM.6871M     | GTEX-15CHQ | Cortex        | Male   |
| GTEX.15DCD.0011.R2b.SM.6LPIE | GTEX-15DCD | Substantia ni | Female |
| GTEX.15DCD.0011.R4a.SM.69LPB | GTEX-15DCD | Amygdala      | Female |
| GTEX.15DCD.0011.R7b.SM.6LPID | GTEX-15DCD | Putamen       | Female |
| GTEX.15DDE.0011.R4b.SM.7KULI | GTEX-15DDE | Amygdala      | Female |
| GTEX.15DYW.0011.R7a.SM.7KULG | GTEX-15DYW | Putamen       | Female |
| GTEX.15DYW.0011.R4a.SM.6M46V | GTEX-15DYW | Amygdala      | Female |
| GTEX.15DYW.0011.R2b.SM.7KUKY | GTEX-15DYW | Substantia ni | Female |
| GTEX.15DYW.2026.SM.6AJBD     | GTEX-15DYW | Cortex        | Female |
| GTEX.15EO6.0011.R7a.SM.6M46Q | GTEX-15EO6 | Putamen       | Male   |
| GTEX.15EO6.0011.R2a.SM.6M46R | GTEX-15EO6 | Substantia ni | Male   |
| GTEX.15EO6.3026.SM.7KUMA     | GTEX-15EO6 | Cortex        | Male   |
| GTEX.15ER7.0011.R7a.SM.6M46N | GTEX-15ER7 | Putamen       | Female |
| GTEX.15ER7.3126.SM.7KUGH     | GTEX-15ER7 | Cortex        | Female |
| GTEX.15ER7.0011.R4a.SM.6M46S | GTEX-15ER7 | Amygdala      | Female |
| GTEX.15ER7.0011.R2a.SM.6M46O | GTEX-15ER7 | Substantia ni | Female |
| GTEX.15G19.0011.R7b.SM.6M479 | GTEX-15G19 | Putamen       | Male   |
| GTEX.15G19.2926.SM.7KUFL     | GTEX-15G19 | Cortex        | Male   |
| GTEX.15RJE.3026.SM.7KUM1     | GTEX-15RJE | Cortex        | Male   |
| GTEX.15RJE.0011.R2b.SM.79OMP | GTEX-15RJE | Substantia ni | Male   |
| GTEX.15RJE.0011.R7a.SM.7DHL9 | GTEX-15RJE | Putamen       | Male   |
| GTEX.15SHU.0011.R4b.SM.7IGLC | GTEX-15SHU | Amygdala      | Female |
| GTEX.15SHU.3126.SM.6M46H     | GTEX-15SHU | Cortex        | Female |
| GTEX.15UF6.3026.SM.7KUKL     | GTEX-15UF6 | Cortex        | Female |
| GTEX.16GPK.3026.SM.79ON9     | GTEX-16GPK | Cortex        | Male   |
| GTEX.16MT8.1926.SM.7EPGL     | GTEX-16MT8 | Cortex        | Female |

|                              |            |               |        |
|------------------------------|------------|---------------|--------|
| GTEX.16XZZ.3026.SM.79OMJ     | GTEX-16XZZ | Cortex        | Male   |
| GTEX.16YQH.3026.SM.79OMM     | GTEX-16YQH | Cortex        | Male   |
| GTEX.16YQH.0011.R4a.SM.7EPI  | GTEX-16YQH | Amygdala      | Male   |
| GTEX.16Z82.0011.R2b.SM.79OK9 | GTEX-16Z82 | Substantia ni | Male   |
| GTEX.16Z82.3026.SM.79ON3     | GTEX-16Z82 | Cortex        | Male   |
| GTEX.16Z82.0011.R7a.SM.7MKGJ | GTEX-16Z82 | Putamen       | Male   |
| GTEX.17EVP.0011.R4a.SM.79OML | GTEX-17EVP | Amygdala      | Male   |
| GTEX.17EVP.0011.R7a.SM.7LTAN | GTEX-17EVP | Putamen       | Male   |
| GTEX.17EVP.0011.R2a.SM.7LG4W | GTEX-17EVP | Substantia ni | Male   |
| GTEX.17EVP.3026.SM.7IGQL     | GTEX-17EVP | Cortex        | Male   |
| GTEX.17EVQ.2826.SM.7IGQK     | GTEX-17EVQ | Cortex        | Male   |
| GTEX.17EVQ.0011.R7a.SM.7EWDA | GTEX-17EVQ | Putamen       | Male   |
| GTEX.17EVQ.0011.R4b.SM.7LT94 | GTEX-17EVQ | Amygdala      | Male   |
| GTEX.17F97.0011.R4b.SM.7KFS2 | GTEX-17F97 | Amygdala      | Male   |
| GTEX.17F97.3026.SM.79OKC     | GTEX-17F97 | Cortex        | Male   |
| GTEX.17F97.1926.SM.7IGM4     | GTEX-17F97 | Cortex        | Male   |
| GTEX.17HHY.0011.R7a.SM.718A1 | GTEX-17HHY | Putamen       | Male   |
| GTEX.17HHY.3026.SM.79OKP     | GTEX-17HHY | Cortex        | Male   |
| GTEX.17HHY.2326.SM.7KFSR     | GTEX-17HHY | Cortex        | Male   |
| GTEX.17HII.0011.R7a.SM.79OMS | GTEX-17HII | Putamen       | Male   |
| GTEX.17HII.3026.SM.7EWF      | GTEX-17HII | Cortex        | Male   |
| GTEX.17JCI.3126.SM.7LTA2     | GTEX-17JCI | Cortex        | Female |
| GTEX.17MF6.0011.R7b.SM.7LG6J | GTEX-17MF6 | Putamen       | Male   |
| GTEX.17MF6.2926.SM.7LTAW     | GTEX-17MF6 | Cortex        | Male   |
| GTEX.183WM.2826.SM.731C2     | GTEX-183WM | Cortex        | Female |
| GTEX.183WM.0011.R4a.SM.7LG6S | GTEX-183WM | Amygdala      | Female |
| GTEX.183WM.0011.R7b.SM.731AX | GTEX-183WM | Putamen       | Female |
| GTEX.1A3MW.2226.SM.73KUX     | GTEX-1A3MW | Cortex        | Female |
| GTEX.1A3MX.3026.SM.731BF     | GTEX-1A3MX | Cortex        | Male   |
| GTEX.1A3MX.0011.R2b.SM.7EWFL | GTEX-1A3MX | Substantia ni | Male   |
| GTEX.1A3MX.0011.R7a.SM.7DUEM | GTEX-1A3MX | Putamen       | Male   |
| GTEX.1A3MX.0011.R4b.SM.7EWFK | GTEX-1A3MX | Amygdala      | Male   |
| GTEX.1A8G6.2926.SM.731CK     | GTEX-1A8G6 | Cortex        | Male   |
| GTEX.1A8G7.3126.SM.7IGP7     | GTEX-1A8G7 | Cortex        | Male   |
| GTEX.1A8G7.0011.R2a.SM.7IGQI | GTEX-1A8G7 | Substantia ni | Male   |
| GTEX.1AX8Z.2326.SM.731CR     | GTEX-1AX8Z | Cortex        | Male   |
| GTEX.1AX9I.0011.R4b.SM.7EPIB | GTEX-1AX9I | Amygdala      | Male   |
| GTEX.1AX9I.3026.SM.73KUH     | GTEX-1AX9I | Cortex        | Male   |
| GTEX.1B8L1.0011.R4a.SM.7EWFJ | GTEX-1B8L1 | Amygdala      | Male   |
| GTEX.1B8L1.3026.SM.7EPHK     | GTEX-1B8L1 | Cortex        | Male   |
| GTEX.1B8SF.3126.SM.73KU1     | GTEX-1B8SF | Cortex        | Male   |
| GTEX.1B8SG.1726.SM.73KXX     | GTEX-1B8SG | Cortex        | Male   |
| GTEX.1B8SG.0011.R2b.SM.79OOT | GTEX-1B8SG | Substantia ni | Male   |

|                              |            |               |        |
|------------------------------|------------|---------------|--------|
| GTEX.1B933.0011.R7a.SM.7DUGX | GTEX-1B933 | Putamen       | Female |
| GTEX.1B933.0011.R2b.SM.7IGNM | GTEX-1B933 | Substantia ni | Female |
| GTEX.1B996.0011.R7b.SM.7IGNT | GTEX-1B996 | Putamen       | Male   |
| GTEX.1B996.0011.R2a.SM.7IGON | GTEX-1B996 | Substantia ni | Male   |
| GTEX.1BAJH.1826.SM.731DA     | GTEX-1BAJH | Cortex        | Male   |
| GTEX.1C64N.0011.R7a.SM.7IGOI | GTEX-1C64N | Putamen       | Male   |
| GTEX.1CB4H.3126.SM.7IGN4     | GTEX-1CB4H | Cortex        | Female |
| GTEX.N7MS.0011.R7a.SM.2HMKN  | GTEX-N7MS  | Putamen       | Male   |
| GTEX.N7MS.0011.R2a.SM.2HML6  | GTEX-N7MS  | Substantia ni | Male   |
| GTEX.N7MS.0011.R4a.SM.2HMKW  | GTEX-N7MS  | Amygdala      | Male   |
| GTEX.N7MT.0011.R4a.SM.2I3G9  | GTEX-N7MT  | Amygdala      | Female |
| GTEX.N7MT.0011.R7a.SM.2I3FZ  | GTEX-N7MT  | Putamen       | Female |
| GTEX.N7MT.0011.R2a.SM.2I3GI  | GTEX-N7MT  | Substantia ni | Female |
| GTEX.NL3H.0011.R4a.SM.2I3GK  | GTEX-NL3H  | Amygdala      | Male   |
| GTEX.NL3H.0011.R7a.SM.2I3G5  | GTEX-NL3H  | Putamen       | Male   |
| GTEX.NL4W.0011.R4a.SM.2I5GZ  | GTEX-NL4W  | Amygdala      | Male   |
| GTEX.NL4W.0011.R2a.SM.2I5GV  | GTEX-NL4W  | Substantia ni | Male   |
| GTEX.NPJ7.0011.R4a.SM.2I3GJ  | GTEX-NPJ7  | Amygdala      | Female |
| GTEX.NPJ7.0011.R2a.SM.2I3GF  | GTEX-NPJ7  | Substantia ni | Female |
| GTEX.NPJ7.2726.SM.2I3FT      | GTEX-NPJ7  | Cortex        | Female |
| GTEX.NPJ8.0011.R4a.SM.2HML3  | GTEX-NPJ8  | Amygdala      | Male   |
| GTEX.NPJ8.1526.SM.2D7VU      | GTEX-NPJ8  | Cortex        | Male   |
| GTEX.NPJ8.0011.R2a.SM.2TC6M  | GTEX-NPJ8  | Substantia ni | Male   |
| GTEX.NPJ8.0011.R7a.SM.2HMJV  | GTEX-NPJ8  | Putamen       | Male   |
| GTEX.NPJ8.2226.SM.3TW8D      | GTEX-NPJ8  | Cortex        | Male   |
| GTEX.OHPN.0011.R7A.SM.2I5FI  | GTEX-OHPN  | Putamen       | Female |
| GTEX.OHPN.0011.R2A.SM.2I5FB  | GTEX-OHPN  | Substantia ni | Female |
| GTEX.OHPN.0011.R4A.SM.2I5FD  | GTEX-OHPN  | Amygdala      | Female |
| GTEX.OXRN.2426.SM.2I5EQ      | GTEX-OXRN  | Cortex        | Male   |
| GTEX.OXRO.0011.R2A.SM.3NB1W  | GTEX-OXRO  | Substantia ni | Female |
| GTEX.P44H.0011.R4A.SM.2XCEW  | GTEX-P44H  | Amygdala      | Male   |
| GTEX.P4QS.1126.SM.3NMD5      | GTEX-P4QS  | Cortex        | Male   |
| GTEX.PVOW.2526.SM.2XCF7      | GTEX-PVOW  | Cortex        | Male   |
| GTEX.PWO3.0926.SM.2I5EY      | GTEX-PWO3  | Cortex        | Female |
| GTEX.PWO3.0011.R2A.SM.2S1OX  | GTEX-PWO3  | Substantia ni | Female |
| GTEX.Q2AG.0011.R4A.SM.2HMKA  | GTEX-Q2AG  | Amygdala      | Female |
| GTEX.Q2AG.2926.SM.2HMJ3      | GTEX-Q2AG  | Cortex        | Female |
| GTEX.Q2AG.0011.R7A.SM.2HMJP  | GTEX-Q2AG  | Putamen       | Female |
| GTEX.Q2AG.0011.R2A.SM.2HMIT  | GTEX-Q2AG  | Substantia ni | Female |
| GTEX.QDT8.0011.R4A.SM.32PKM  | GTEX-QDT8  | Amygdala      | Female |
| GTEX.QDT8.2926.SM.32PKC      | GTEX-QDT8  | Cortex        | Female |
| GTEX.QDT8.0011.R2A.SM.32PKQ  | GTEX-QDT8  | Substantia ni | Female |
| GTEX.QDT8.0011.R7A.SM.32PKF  | GTEX-QDT8  | Putamen       | Female |

|                             |           |               |        |
|-----------------------------|-----------|---------------|--------|
| GTEX.QDVN.1626.SM.48TZC     | GTEX-QDVN | Cortex        | Male   |
| GTEX.QMR6.0011.R4A.SM.32PKU | GTEX-QMR6 | Amygdala      | Male   |
| GTEX.QMR6.1426.SM.32PLA     | GTEX-QMR6 | Cortex        | Male   |
| GTEX.QMR6.0011.R2A.SM.32PKV | GTEX-QMR6 | Substantia ni | Male   |
| GTEX.QMR6.0011.R7A.SM.32PKL | GTEX-QMR6 | Putamen       | Male   |
| GTEX.QVJO.1426.SM.2S1QY     | GTEX-QVJO | Cortex        | Female |
| GTEX.QVJO.0011.R4A.SM.2S1QL | GTEX-QVJO | Amygdala      | Female |
| GTEX.QVUS.2826.SM.3GADB     | GTEX-QVUS | Cortex        | Female |
| GTEX.QVUS.0011.R4A.SM.3GAE7 | GTEX-QVUS | Amygdala      | Female |
| GTEX.R55E.0011.R7A.SM.2TC5Z | GTEX-R55E | Putamen       | Male   |
| GTEX.R55E.0011.R4A.SM.2TC5H | GTEX-R55E | Amygdala      | Male   |
| GTEX.RN64.1626.SM.48FD7     | GTEX-RN64 | Cortex        | Male   |
| GTEX.RNOR.2326.SM.2TF4I     | GTEX-RNOR | Cortex        | Female |
| GTEX.RNOR.0011.R4A.SM.3GAD3 | GTEX-RNOR | Amygdala      | Female |
| GTEX.RNOR.0011.R7A.SM.2TF4V | GTEX-RNOR | Putamen       | Female |
| GTEX.RU72.0011.R2A.SM.2TF6O | GTEX-RU72 | Substantia ni | Female |
| GTEX.RU72.0011.R7A.SM.2TF5U | GTEX-RU72 | Putamen       | Female |
| GTEX.S7SE.0011.R7A.SM.2XCDI | GTEX-S7SE | Putamen       | Male   |
| GTEX.S7SE.0011.R4A.SM.2XCDB | GTEX-S7SE | Amygdala      | Male   |
| GTEX.S7SE.0011.R2A.SM.2XCDC | GTEX-S7SE | Substantia ni | Male   |
| GTEX.T2IS.0011.R2A.SM.32QPF | GTEX-T2IS | Substantia ni | Female |
| GTEX.T2IS.3026.SM.32QPM     | GTEX-T2IS | Cortex        | Female |
| GTEX.T5JC.2426.SM.3NMDB     | GTEX-T5JC | Cortex        | Male   |
| GTEX.T5JC.1526.SM.4DM68     | GTEX-T5JC | Cortex        | Male   |
| GTEX.T5JC.0011.R7A.SM.32PME | GTEX-T5JC | Putamen       | Male   |
| GTEX.T5JC.0011.R2A.SM.32PLZ | GTEX-T5JC | Substantia ni | Male   |
| GTEX.T5JC.0011.R4A.SM.32PLT | GTEX-T5JC | Amygdala      | Male   |
| GTEX.T6MN.0011.R4A.SM.32QPG | GTEX-T6MN | Amygdala      | Male   |
| GTEX.T6MN.2626.SM.32PMQ     | GTEX-T6MN | Cortex        | Male   |
| GTEX.T6MN.0011.R7A.SM.32QP5 | GTEX-T6MN | Putamen       | Male   |
| GTEX.T6MN.0011.R2A.SM.32QOW | GTEX-T6MN | Substantia ni | Male   |
| GTEX.TSE9.0011.R7A.SM.3DB7P | GTEX-TSE9 | Putamen       | Female |
| GTEX.TSE9.0011.R4A.SM.3DB7H | GTEX-TSE9 | Amygdala      | Female |
| GTEX.TSE9.3026.SM.3DB76     | GTEX-TSE9 | Cortex        | Female |
| GTEX.UTHO.0011.R4A.SM.3GIJP | GTEX-UTHO | Amygdala      | Male   |
| GTEX.UTHO.0011.R2A.SM.3GIKC | GTEX-UTHO | Substantia ni | Male   |
| GTEX.UTHO.3026.SM.3GAFB     | GTEX-UTHO | Cortex        | Male   |
| GTEX.WHSE.3026.SM.3P5ZH     | GTEX-WHSE | Cortex        | Male   |
| GTEX.WHSE.0011.R4A.SM.3P5ZN | GTEX-WHSE | Amygdala      | Male   |
| GTEX.WHSE.0011.R2A.SM.3P5ZL | GTEX-WHSE | Substantia ni | Male   |
| GTEX.WHSE.0011.R7A.SM.3P5YZ | GTEX-WHSE | Putamen       | Male   |
| GTEX.WL46.0011.R7A.SM.3LK7X | GTEX-WL46 | Putamen       | Male   |
| GTEX.WL46.2926.SM.3LK82     | GTEX-WL46 | Cortex        | Male   |

|                             |           |               |        |
|-----------------------------|-----------|---------------|--------|
| GTEX.WVLH.3026.SM.3MJG9     | GTEX-WVLH | Cortex        | Male   |
| GTEX.WVLH.0011.R4A.SM.3MJFS | GTEX-WVLH | Amygdala      | Male   |
| GTEX.WVLH.0011.R7A.SM.3MJFB | GTEX-WVLH | Putamen       | Male   |
| GTEX.WWYW.3126.SM.3NB39     | GTEX-WWYW | Cortex        | Female |
| GTEX.WWYW.0011.R7A.SM.3NB3H | GTEX-WWYW | Putamen       | Female |
| GTEX.WZTO.0011.R4A.SM.3NMC7 | GTEX-WZTO | Amygdala      | Male   |
| GTEX.WZTO.2926.SM.3NM9I     | GTEX-WZTO | Cortex        | Male   |
| GTEX.WZTO.0011.R7B.SM.4E3IS | GTEX-WZTO | Putamen       | Male   |
| GTEX.X261.0011.R7A.SM.4E3JJ | GTEX-X261 | Putamen       | Male   |
| GTEX.X4XX.0011.R2A.SM.3P623 | GTEX-X4XX | Substantia ni | Male   |
| GTEX.X4XX.3026.SM.3NMB2     | GTEX-X4XX | Cortex        | Male   |
| GTEX.X4XX.0011.R4B.SM.46MWL | GTEX-X4XX | Amygdala      | Male   |
| GTEX.X585.0011.R4B.SM.46MVH | GTEX-X585 | Amygdala      | Male   |
| GTEX.X585.3026.SM.46MWF     | GTEX-X585 | Cortex        | Male   |
| GTEX.X585.0011.R2B.SM.46MVF | GTEX-X585 | Substantia ni | Male   |
| GTEX.XMD1.0011.R2B.SM.4AT5N | GTEX-XMD1 | Substantia ni | Male   |
| GTEX.XPVG.0526.SM.4B65N     | GTEX-XPVG | Cortex        | Male   |
| GTEX.Y111.2726.SM.4TT3N     | GTEX-Y111 | Cortex        | Male   |
| GTEX.Y5V6.2026.SM.5IFHO     | GTEX-Y5V6 | Cortex        | Male   |
| GTEX.Y8DK.0011.R7A.SM.4SOJZ | GTEX-Y8DK | Putamen       | Male   |
| GTEX.Y8DK.0826.SM.4TT3T     | GTEX-Y8DK | Cortex        | Male   |
| GTEX.YFC4.0011.R4a.SM.4RGLQ | GTEX-YFC4 | Amygdala      | Female |
| GTEX.YFC4.0011.R2a.SM.4V6DZ | GTEX-YFC4 | Substantia ni | Female |
| GTEX.YFC4.0011.R7b.SM.4V6E2 | GTEX-YFC4 | Putamen       | Female |
| GTEX.YFC4.3126.SM.5PNV6     | GTEX-YFC4 | Cortex        | Female |
| GTEX.YJ89.0011.R7a.SM.4V6GO | GTEX-YJ89 | Putamen       | Male   |
| GTEX.YJ89.3026.SM.5IFJI     | GTEX-YJ89 | Cortex        | Male   |
| GTEX.YJ89.0011.R2b.SM.4RGLT | GTEX-YJ89 | Substantia ni | Male   |
| GTEX.Z93S.0011.R2a.SM.4RGNG | GTEX-Z93S | Substantia ni | Male   |
| GTEX.Z93S.0011.R7b.SM.4RGNK | GTEX-Z93S | Putamen       | Male   |
| GTEX.Z93S.2926.SM.57WB9     | GTEX-Z93S | Cortex        | Male   |
| GTEX.ZAB4.0011.R2a.SM.4RGNP | GTEX-ZAB4 | Substantia ni | Male   |
| GTEX.ZAB4.0011.R4a.SM.4SOKB | GTEX-ZAB4 | Amygdala      | Male   |
| GTEX.ZAB4.0011.R7a.SM.4SOKE | GTEX-ZAB4 | Putamen       | Male   |
| GTEX.ZAJG.3126.SM.5HL9J     | GTEX-ZAJG | Cortex        | Female |
| GTEX.ZC5H.1726.SM.5HL7X     | GTEX-ZC5H | Cortex        | Female |
| GTEX.ZDXO.0011.R7a.SM.4WWCU | GTEX-ZDXO | Putamen       | Male   |
| GTEX.ZDXO.2126.SM.4WKFI     | GTEX-ZDXO | Cortex        | Male   |
| GTEX.ZDXO.0226.SM.4WKH7     | GTEX-ZDXO | Cortex        | Male   |
| GTEX.ZDXO.0011.R2b.SM.4WKFG | GTEX-ZDXO | Substantia ni | Male   |
| GTEX.ZE7O.3126.SM.5HL5X     | GTEX-ZE7O | Cortex        | Female |
| GTEX.ZE7O.0011.R7a.SM.57WCU | GTEX-ZE7O | Putamen       | Female |
| GTEX.ZF28.3026.SM.4WKHP     | GTEX-ZF28 | Cortex        | Male   |

|                             |           |                  |        |
|-----------------------------|-----------|------------------|--------|
| GTEX.ZF28.0011.R7a.SM.4WKF5 | GTEX-ZF28 | Putamen          | Male   |
| GTEX.ZLFU.0926.SM.5P9F8     | GTEX-ZLFU | Cortex           | Male   |
| GTEX.ZUA1.3026.SM.59HJC     | GTEX-ZUA1 | Cortex           | Male   |
| GTEX.ZUA1.0011.R7b.SM.4YCDP | GTEX-ZUA1 | Putamen          | Male   |
| GTEX.ZV68.0011.R2a.SM.4YCDK | GTEX-ZV68 | Substantia nigra | Female |
| GTEX.ZV68.0011.R7a.SM.51MT4 | GTEX-ZV68 | Putamen          | Female |
| GTEX.ZVT3.3026.SM.5E43N     | GTEX-ZVT3 | Cortex           | Female |
| GTEX.ZVT3.0011.R7a.SM.57WCO | GTEX-ZVT3 | Putamen          | Female |
| GTEX.ZVZP.0926.SM.5GIDB     | GTEX-ZVZP | Cortex           | Male   |
| GTEX.ZVZQ.0011.R4b.SM.57WCZ | GTEX-ZVZQ | Amygdala         | Female |
| GTEX.ZVZQ.0011.R7b.SM.57WBB | GTEX-ZVZQ | Putamen          | Female |
| GTEX.ZXG5.0011.R7b.SM.57WCC | GTEX-ZXG5 | Putamen          | Male   |
| GTEX.ZYFD.3026.SM.5E44C     | GTEX-ZYFD | Cortex           | Male   |
| GTEX.ZYFG.1626.SM.5GZYY     | GTEX-ZYFG | Cortex           | Female |
| GTEX.ZYT6.2226.SM.5GIC9     | GTEX-ZYT6 | Cortex           | Male   |
| GTEX.ZYY3.3126.SM.5SI9L     | GTEX-ZYY3 | Cortex           | Female |
| GTEX.ZZPT.3026.SM.5GZXH     | GTEX-ZZPT | Cortex           | Male   |



| Age   | AgeGroup | RIN |
|-------|----------|-----|
| 60-69 | Aged     | 6.2 |
| 60-69 | Aged     | 6.1 |
| 60-69 | Aged     | 6.3 |
| 60-69 | Aged     | 6.4 |
| 50-59 | Young    | 7.1 |
| 60-69 | Aged     | 7.7 |
| 60-69 | Aged     | 6.4 |
| 60-69 | Aged     | 6   |
| 60-69 | Aged     | 6.1 |
| 60-69 | Aged     | 6.2 |
| 60-69 | Aged     | 6.8 |
| 60-69 | Aged     | 6.6 |
| 60-69 | Aged     | 7.8 |
| 60-69 | Aged     | 6.1 |
| 50-59 | Young    | 7.1 |
| 60-69 | Aged     | 7.5 |
| 60-69 | Aged     | 5.8 |
| 50-59 | Young    | 5.9 |
| 50-59 | Young    | 6   |
| 60-69 | Aged     | 6.2 |
| 60-69 | Aged     | 6.1 |
| 40-49 | Young    | 8.1 |
| 60-69 | Aged     | 7   |
| 50-59 | Young    | 6.6 |
| 60-69 | Aged     | 7.6 |
| 30-39 | Young    | 6.3 |
| 50-59 | Young    | 7   |
| 20-29 | Young    | 6.9 |
| 60-69 | Aged     | 5.8 |
| 60-69 | Aged     | 6.5 |
| 60-69 | Aged     | 6   |
| 60-69 | Aged     | 5.8 |
| 60-69 | Aged     | 7.2 |
| 60-69 | Aged     | 5.8 |
| 60-69 | Aged     | 5.8 |
| 60-69 | Aged     | 7.9 |
| 20-29 | Young    | 5.9 |
| 70-79 | Aged     | 7.1 |
| 70-79 | Aged     | 7.1 |
| 70-79 | Aged     | 5.9 |
| 70-79 | Aged     | 7.3 |
| 50-59 | Young    | 7.3 |

|       |       |     |
|-------|-------|-----|
| 50-59 | Young | 6   |
| 50-59 | Young | 6   |
| 50-59 | Young | 6.4 |
| 50-59 | Young | 7.1 |
| 60-69 | Aged  | 7.7 |
| 50-59 | Young | 7   |
| 50-59 | Young | 7   |
| 50-59 | Young | 6.2 |
| 40-49 | Young | 7.9 |
| 40-49 | Young | 8.4 |
| 40-49 | Young | 6.8 |
| 60-69 | Aged  | 7.8 |
| 60-69 | Aged  | 6.7 |
| 60-69 | Aged  | 8.1 |
| 60-69 | Aged  | 6.1 |
| 60-69 | Aged  | 6.2 |
| 50-59 | Young | 8.7 |
| 50-59 | Young | 7.1 |
| 50-59 | Young | 6.2 |
| 50-59 | Young | 6.9 |
| 50-59 | Young | 8.9 |
| 50-59 | Young | 6.9 |
| 50-59 | Young | 7   |
| 50-59 | Young | 7.7 |
| 50-59 | Young | 7.1 |
| 50-59 | Young | 6.2 |
| 60-69 | Aged  | 7.1 |
| 60-69 | Aged  | 6.6 |
| 60-69 | Aged  | 7.8 |
| 60-69 | Aged  | 5.7 |
| 60-69 | Aged  | 7.9 |
| 60-69 | Aged  | 6.9 |
| 60-69 | Aged  | 7.1 |
| 60-69 | Aged  | 7   |
| 60-69 | Aged  | 6.1 |
| 60-69 | Aged  | 6.8 |
| 60-69 | Aged  | 6.9 |
| 60-69 | Aged  | 6.1 |
| 60-69 | Aged  | 6.8 |
| 50-59 | Young | 6.7 |
| 50-59 | Young | 6.1 |
| 50-59 | Young | 7.9 |
| 50-59 | Young | 5.9 |

|       |       |     |
|-------|-------|-----|
| 50-59 | Young | 6.8 |
| 50-59 | Young | 7.5 |
| 50-59 | Young | 6.5 |
| 50-59 | Young | 8.1 |
| 50-59 | Young | 7   |
| 60-69 | Aged  | 6.1 |
| 60-69 | Aged  | 7.9 |
| 70-79 | Aged  | 6.1 |
| 40-49 | Young | 5.8 |
| 40-49 | Young | 5.8 |
| 60-69 | Aged  | 6   |
| 60-69 | Aged  | 6   |
| 60-69 | Aged  | 5.9 |
| 60-69 | Aged  | 5.8 |
| 60-69 | Aged  | 6.3 |
| 60-69 | Aged  | 6.8 |
| 40-49 | Young | 5.7 |
| 40-49 | Young | 6.1 |
| 40-49 | Young | 7.7 |
| 40-49 | Young | 7.1 |
| 60-69 | Aged  | 7.1 |
| 60-69 | Aged  | 6.3 |
| 60-69 | Aged  | 6.9 |
| 60-69 | Aged  | 6.7 |
| 60-69 | Aged  | 5.7 |
| 60-69 | Aged  | 7   |
| 60-69 | Aged  | 6.3 |
| 60-69 | Aged  | 7.6 |
| 60-69 | Aged  | 6.7 |
| 50-59 | Young | 6.7 |
| 50-59 | Young | 6.1 |
| 50-59 | Young | 8.5 |
| 50-59 | Young | 6.9 |
| 70-79 | Aged  | 6.3 |
| 70-79 | Aged  | 6.3 |
| 60-69 | Aged  | 8.8 |
| 50-59 | Young | 6.6 |
| 50-59 | Young | 7.6 |
| 50-59 | Young | 6.7 |
| 50-59 | Young | 6.4 |
| 50-59 | Young | 6   |
| 50-59 | Young | 6   |
| 50-59 | Young | 6.1 |

|       |       |     |
|-------|-------|-----|
| 60-69 | Aged  | 7.3 |
| 60-69 | Aged  | 6.9 |
| 50-59 | Young | 6.5 |
| 50-59 | Young | 8   |
| 50-59 | Young | 5.7 |
| 50-59 | Young | 5.9 |
| 50-59 | Young | 6.5 |
| 50-59 | Young | 5.8 |
| 50-59 | Young | 6   |
| 60-69 | Aged  | 5.9 |
| 60-69 | Aged  | 7   |
| 60-69 | Aged  | 6.7 |
| 40-49 | Young | 5.7 |
| 50-59 | Young | 5.8 |
| 50-59 | Young | 6.3 |
| 50-59 | Young | 6.7 |
| 60-69 | Aged  | 6.2 |
| 60-69 | Aged  | 5.9 |
| 60-69 | Aged  | 7.1 |
| 60-69 | Aged  | 6.7 |
| 60-69 | Aged  | 5.9 |
| 60-69 | Aged  | 9.1 |
| 60-69 | Aged  | 7.2 |
| 60-69 | Aged  | 7   |
| 60-69 | Aged  | 7   |
| 60-69 | Aged  | 8   |
| 70-79 | Aged  | 6.2 |
| 70-79 | Aged  | 6.8 |
| 50-59 | Young | 6.1 |
| 50-59 | Young | 6.5 |
| 50-59 | Young | 5.7 |
| 50-59 | Young | 7.3 |
| 50-59 | Young | 8.3 |
| 50-59 | Young | 6   |
| 60-69 | Aged  | 7.8 |
| 60-69 | Aged  | 8.4 |
| 60-69 | Aged  | 6.5 |
| 50-59 | Young | 8.7 |
| 50-59 | Young | 6.2 |
| 50-59 | Young | 6.5 |
| 60-69 | Aged  | 6.7 |
| 60-69 | Aged  | 6.7 |
| 60-69 | Aged  | 8.2 |

|       |       |     |
|-------|-------|-----|
| 60-69 | Aged  | 6.5 |
| 50-59 | Young | 6.5 |
| 50-59 | Young | 7.1 |
| 50-59 | Young | 6.8 |
| 50-59 | Young | 6.8 |
| 50-59 | Young | 8.4 |
| 60-69 | Aged  | 5.7 |
| 30-39 | Young | 7.5 |
| 50-59 | Young | 6.8 |
| 60-69 | Aged  | 6.2 |
| 60-69 | Aged  | 7.2 |
| 60-69 | Aged  | 6.1 |
| 60-69 | Aged  | 6.9 |
| 60-69 | Aged  | 6.3 |
| 50-59 | Young | 6.6 |
| 50-59 | Young | 5.8 |
| 50-59 | Young | 5.7 |
| 60-69 | Aged  | 5.8 |
| 60-69 | Aged  | 6.5 |
| 60-69 | Aged  | 6.7 |
| 60-69 | Aged  | 7.1 |
| 50-59 | Young | 7.2 |
| 60-69 | Aged  | 5.8 |
| 60-69 | Aged  | 6.8 |
| 60-69 | Aged  | 6.3 |
| 50-59 | Young | 6.4 |
| 50-59 | Young | 8   |
| 50-59 | Young | 7.4 |
| 50-59 | Young | 6.2 |
| 50-59 | Young | 6.5 |
| 40-49 | Young | 7.2 |
| 40-49 | Young | 6.3 |
| 60-69 | Aged  | 9.1 |
| 60-69 | Aged  | 7.9 |
| 60-69 | Aged  | 7.5 |
| 60-69 | Aged  | 5.9 |
| 60-69 | Aged  | 7.1 |
| 60-69 | Aged  | 7.3 |
| 50-59 | Young | 7.5 |
| 70-79 | Aged  | 6.6 |
| 70-79 | Aged  | 6   |
| 40-49 | Young | 6.6 |
| 40-49 | Young | 7.2 |

|       |       |     |
|-------|-------|-----|
| 40-49 | Young | 6.4 |
| 40-49 | Young | 8.5 |
| 60-69 | Aged  | 7.3 |
| 60-69 | Aged  | 6.8 |
| 60-69 | Aged  | 6.1 |
| 60-69 | Aged  | 7.4 |
| 50-59 | Young | 7.8 |
| 50-59 | Young | 5.8 |
| 50-59 | Young | 6.8 |
| 60-69 | Aged  | 6.7 |
| 60-69 | Aged  | 6.4 |
| 50-59 | Young | 6.9 |
| 50-59 | Young | 7.5 |
| 50-59 | Young | 7.1 |
| 50-59 | Young | 7.1 |
| 60-69 | Aged  | 7.7 |
| 60-69 | Aged  | 7.7 |
| 60-69 | Aged  | 6.1 |
| 70-79 | Aged  | 6.8 |
| 70-79 | Aged  | 7.5 |
| 70-79 | Aged  | 7.8 |
| 50-59 | Young | 6.8 |
| 60-69 | Aged  | 7.4 |
| 60-69 | Aged  | 8   |
| 60-69 | Aged  | 7.3 |
| 60-69 | Aged  | 5.8 |
| 50-59 | Young | 7.9 |
| 50-59 | Young | 7.5 |
| 50-59 | Young | 7.4 |
| 20-29 | Young | 9.2 |
| 20-29 | Young | 6.9 |
| 20-29 | Young | 6.7 |
| 20-29 | Young | 8   |
| 60-69 | Aged  | 7.2 |
| 60-69 | Aged  | 6.5 |
| 40-49 | Young | 6.4 |
| 40-49 | Young | 6.7 |
| 40-49 | Young | 8.4 |
| 40-49 | Young | 6.2 |
| 40-49 | Young | 7.3 |
| 70-79 | Aged  | 5.9 |
| 60-69 | Aged  | 6.5 |
| 60-69 | Aged  | 6.8 |

|       |       |     |
|-------|-------|-----|
| 60-69 | Aged  | 6.5 |
| 30-39 | Young | 6.7 |
| 30-39 | Young | 6.8 |
| 60-69 | Aged  | 7.1 |
| 60-69 | Aged  | 6.7 |
| 60-69 | Aged  | 6.9 |
| 40-49 | Young | 6.6 |
| 40-49 | Young | 8.2 |
| 40-49 | Young | 6.7 |
| 40-49 | Young | 5.9 |
| 70-79 | Aged  | 5.8 |
| 70-79 | Aged  | 6.4 |
| 70-79 | Aged  | 6.3 |
| 50-59 | Young | 7.3 |
| 50-59 | Young | 7.1 |
| 50-59 | Young | 6.1 |
| 50-59 | Young | 7   |
| 50-59 | Young | 7.1 |
| 50-59 | Young | 6.5 |
| 50-59 | Young | 6.5 |
| 50-59 | Young | 6.3 |
| 60-69 | Aged  | 6.9 |
| 40-49 | Young | 6.2 |
| 40-49 | Young | 6.2 |
| 70-79 | Aged  | 6.6 |
| 70-79 | Aged  | 5.7 |
| 70-79 | Aged  | 6.7 |
| 60-69 | Aged  | 6.6 |
| 60-69 | Aged  | 6.8 |
| 60-69 | Aged  | 6.4 |
| 60-69 | Aged  | 7.4 |
| 60-69 | Aged  | 6.3 |
| 60-69 | Aged  | 5.9 |
| 60-69 | Aged  | 6   |
| 60-69 | Aged  | 5.7 |
| 60-69 | Aged  | 7.9 |
| 60-69 | Aged  | 6.9 |
| 60-69 | Aged  | 6.9 |
| 60-69 | Aged  | 6.3 |
| 60-69 | Aged  | 6.9 |
| 60-69 | Aged  | 6.6 |
| 50-59 | Young | 6.1 |
| 50-59 | Young | 6.6 |

|       |       |     |
|-------|-------|-----|
| 50-59 | Young | 7.2 |
| 50-59 | Young | 6.3 |
| 60-69 | Aged  | 6.1 |
| 60-69 | Aged  | 5.9 |
| 70-79 | Aged  | 5.7 |
| 50-59 | Young | 5.9 |
| 60-69 | Aged  | 6.2 |
| 60-69 | Aged  | 6.4 |
| 60-69 | Aged  | 7   |
| 60-69 | Aged  | 6.2 |
| 60-69 | Aged  | 6.5 |
| 60-69 | Aged  | 7.3 |
| 60-69 | Aged  | 6.6 |
| 60-69 | Aged  | 7   |
| 60-69 | Aged  | 7   |
| 50-59 | Young | 5.9 |
| 50-59 | Young | 5.1 |
| 60-69 | Aged  | 6   |
| 60-69 | Aged  | 7   |
| 60-69 | Aged  | 8.9 |
| 40-49 | Young | 6.5 |
| 40-49 | Young | 9.4 |
| 40-49 | Young | 5.9 |
| 40-49 | Young | 6.1 |
| 40-49 | Young | 7.2 |
| 60-69 | Aged  | 6.4 |
| 60-69 | Aged  | 6   |
| 60-69 | Aged  | 5   |
| 50-59 | Young | 7.2 |
| 60-69 | Aged  | 6.3 |
| 40-49 | Young | 6.5 |
| 60-69 | Aged  | 6.4 |
| 40-49 | Young | 7.1 |
| 60-69 | Aged  | 5.4 |
| 60-69 | Aged  | 6.7 |
| 40-49 | Young | 7.7 |
| 40-49 | Young | 6   |
| 40-49 | Young | 8.8 |
| 40-49 | Young | 8.1 |
| 30-39 | Young | 7.3 |
| 30-39 | Young | 6.5 |
| 30-39 | Young | 7.1 |
| 30-39 | Young | 8.9 |



|       |       |     |
|-------|-------|-----|
| 50-59 | Young | 7.3 |
| 50-59 | Young | 6.6 |
| 50-59 | Young | 6.9 |
| 50-59 | Young | 7.3 |
| 50-59 | Young | 6.4 |
| 60-69 | Aged  | 6.9 |
| 60-69 | Aged  | 7.7 |
| 60-69 | Aged  | 6.1 |
| 60-69 | Aged  | 6.8 |
| 20-29 | Young | 7.3 |
| 20-29 | Young | 6.9 |
| 50-59 | Young | 6.6 |
| 50-59 | Young | 6.2 |
| 50-59 | Young | 6.2 |
| 50-59 | Young | 7.7 |
| 50-59 | Young | 6.1 |
| 50-59 | Young | 6.4 |
| 50-59 | Young | 6.1 |
| 50-59 | Young | 7.7 |
| 50-59 | Young | 6.2 |
| 20-29 | Young | 6   |
| 20-29 | Young | 7.2 |
| 20-29 | Young | 7   |
| 20-29 | Young | 5.9 |
| 20-29 | Young | 9.1 |
| 20-29 | Young | 8   |
| 20-29 | Young | 8.6 |
| 50-59 | Young | 7.4 |
| 50-59 | Young | 7   |
| 50-59 | Young | 8   |
| 50-59 | Young | 6.1 |
| 60-69 | Aged  | 7.3 |
| 60-69 | Aged  | 6.9 |
| 60-69 | Aged  | 7.2 |
| 60-69 | Aged  | 6.8 |
| 60-69 | Aged  | 7.2 |
| 60-69 | Aged  | 8.7 |
| 20-29 | Young | 6.7 |
| 20-29 | Young | 7.1 |
| 20-29 | Young | 7.4 |
| 20-29 | Young | 7.9 |
| 50-59 | Young | 7.5 |
| 50-59 | Young | 7   |

|       |       |     |
|-------|-------|-----|
| 50-59 | Young | 6.8 |
| 50-59 | Young | 7.3 |
| 50-59 | Young | 7   |
| 50-59 | Young | 6.8 |
| 50-59 | Young | 7.3 |
| 40-49 | Young | 7   |
| 40-49 | Young | 7.9 |
| 40-49 | Young | 7.9 |
| 50-59 | Young | 6.3 |
| 60-69 | Aged  | 7.6 |
| 60-69 | Aged  | 7   |
| 60-69 | Aged  | 5.9 |
| 50-59 | Young | 7.7 |
| 50-59 | Young | 6.5 |
| 50-59 | Young | 7.6 |
| 60-69 | Aged  | 6   |
| 50-59 | Young | 7.9 |
| 50-59 | Young | 5.9 |
| 60-69 | Aged  | 6.5 |
| 60-69 | Aged  | 8.2 |
| 60-69 | Aged  | 7.1 |
| 40-49 | Young | 6.9 |
| 40-49 | Young | 7.2 |
| 40-49 | Young | 7.9 |
| 40-49 | Young | 6.3 |
| 60-69 | Aged  | 7.3 |
| 60-69 | Aged  | 6.3 |
| 60-69 | Aged  | 6.2 |
| 50-59 | Young | 8.2 |
| 50-59 | Young | 7.7 |
| 50-59 | Young | 6.6 |
| 40-49 | Young | 8.2 |
| 40-49 | Young | 6.2 |
| 40-49 | Young | 8.2 |
| 50-59 | Young | 6.3 |
| 40-49 | Young | 6.1 |
| 60-69 | Aged  | 6.5 |
| 60-69 | Aged  | 6   |
| 60-69 | Aged  | 6.2 |
| 60-69 | Aged  | 5.7 |
| 50-59 | Young | 5.8 |
| 50-59 | Young | 6   |
| 60-69 | Aged  | 6.1 |

|       |       |     |
|-------|-------|-----|
| 60-69 | Aged  | 6.3 |
| 40-49 | Young | 6.4 |
| 40-49 | Young | 7.5 |
| 40-49 | Young | 8.9 |
| 50-59 | Young | 6.1 |
| 50-59 | Young | 6.3 |
| 60-69 | Aged  | 6.9 |
| 60-69 | Aged  | 6.9 |
| 50-59 | Young | 7.8 |
| 60-69 | Aged  | 7.9 |
| 60-69 | Aged  | 7.1 |
| 60-69 | Aged  | 6.7 |
| 50-59 | Young | 6.7 |
| 60-69 | Aged  | 8   |
| 30-39 | Young | 6.8 |
| 60-69 | Aged  | 6.8 |
| 50-59 | Young | 6.2 |

**Supplementary Table 3: A full list of the anatomical regions segmented in the modified Allen brain atlas**

| <b>Structure</b>                                          | <b>right label</b> | <b>left label</b> |
|-----------------------------------------------------------|--------------------|-------------------|
| Tuberomammillary nucleus, ventral part                    | 43690              | 1                 |
| internal capsule                                          | 43692              | 3                 |
| Principal sensory nucleus of the trigeminal               | 43693              | 4                 |
| Parataenial nucleus                                       | 43697              | 8                 |
| Anterior amygdalar area                                   | 43701              | 12                |
| Superior colliculus                                       | 43702              | 13                |
| Intergeniculate leaflet of the lateral geniculate complex | 43703              | 14                |
| Periventricular hypothalamic nucleus                      | 43705              | 16                |
| Oculomotor nucleus                                        | 43707              | 18                |
| Gustatory areas                                           | 43708              | 19                |
| Paraventricular hypothalamic nucleus                      | 43709              | 20                |
| Precommissural nucleus                                    | 43712              | 23                |
| medial forebrain bundle                                   | 43714              | 25                |
| Nucleus accumbens                                         | 43715              | 26                |
| Medial terminal nucleus of the accessory optic tract      | 43716              | 27                |
| medial longitudinal fascicle                              | 43718              | 29                |
| Anterodorsal nucleus                                      | 43720              | 31                |
| Lateral terminal nucleus of the accessory optic tract     | 43721              | 32                |
| Interstitial nucleus of Cajal                             | 43722              | 33                |
| Frontal pole                                              | 43723              | 34                |
| Anterodorsal preoptic nucleus                             | 43724              | 35                |
| Dorsal terminal nucleus of the accessory optic tract      | 43726              | 37                |
| middle cerebellar peduncle                                | 43727              | 38                |
| lateral ventricle                                         | 43728              | 39                |
| Inferior olivary complex                                  | 43729              | 40                |
| Anterior hypothalamic nucleus                             | 43731              | 42                |
| Interposed nucleus                                        | 43732              | 43                |
| motor root of the trigeminal nerve                        | 43733              | 44                |
| Dorsal cochlear nucleus                                   | 43734              | 45                |
| Temporal association areas                                | 43735              | 46                |
| subependymal zone                                         | 43736              | 47                |
| Ventral cochlear nucleus                                  | 43738              | 49                |
| nigrostriatal tract                                       | 43739              | 50                |
| Superior olivary complex, medial part                     | 43740              | 51                |

|                                                |       |     |
|------------------------------------------------|-------|-----|
| Inferior salivatory nucleus                    | 43741 | 52  |
| choroid plexus                                 | 43742 | 53  |
| Superior olivary complex, lateral part         | 43744 | 55  |
| Trochlear nucleus                              | 43745 | 56  |
| Agranular insular area, posterior part         | 43748 | 59  |
| Superior olivary complex, periolivary region   | 43750 | 61  |
| Koelliker-Fuse subnucleus                      | 43751 | 62  |
| optic tract                                    | 43752 | 63  |
| Midbrain reticular nucleus                     | 43754 | 65  |
| Lateral amygdalar nucleus                      | 43756 | 67  |
| Intermediate reticular nucleus                 | 43759 | 70  |
| Nucleus ambiguus, ventral division             | 43762 | 73  |
| Pontine reticular nucleus                      | 43764 | 75  |
| Locus ceruleus                                 | 43765 | 76  |
| Paraventricular nucleus of the thalamus        | 43767 | 78  |
| lateral recess                                 | 43768 | 79  |
| Lateral dorsal nucleus of thalamus             | 43769 | 80  |
| Anterior olfactory nucleus                     | 43772 | 83  |
| Laterodorsal tegmental nucleus                 | 43773 | 84  |
| Nucleus prepositus                             | 43775 | 87  |
| Prelimbic area                                 | 43776 | 88  |
| Retrochiasmatic area                           | 43777 | 89  |
| Nucleus of Roller                              | 43778 | 90  |
| Ventral part of the lateral geniculate complex | 43779 | 91  |
| Nucleus of reuniens                            | 43781 | 93  |
| Lateral habenula                               | 43782 | 94  |
| Accessory olfactory bulb                       | 43784 | 96  |
| pyramid                                        | 43786 | 98  |
| Lateral hypothalamic area                      | 43787 | 99  |
| Medial vestibular nucleus                      | 43792 | 104 |
| Linear nucleus of the medulla                  | 43793 | 105 |
| Area postrema                                  | 43796 | 108 |
| Lateral vestibular nucleus                     | 43797 | 109 |
| Lateral mammillary nucleus                     | 43798 | 110 |
| Red nucleus                                    | 43800 | 112 |
| Anterior pretectal nucleus                     | 43801 | 113 |
| Superior vestibular nucleus                    | 43802 | 114 |
| Lateral posterior nucleus of the thalamus      | 43803 | 115 |
| Arcuate hypothalamic nucleus                   | 43805 | 117 |
| Spinal vestibular nucleus                      | 43806 | 118 |

|                                                      |       |     |
|------------------------------------------------------|-------|-----|
| Lateral preoptic area                                | 43807 | 119 |
| sensory root of the trigeminal nerve                 | 43808 | 120 |
| Anterior tegmental nucleus                           | 43810 | 122 |
| solitary tract                                       | 43813 | 125 |
| Midbrain reticular nucleus, retrorubral area         | 43816 | 128 |
| Lateral septal nucleus, caudal (caudodorsal) part    | 43818 | 130 |
| Anteroventral nucleus of thalamus                    | 43821 | 133 |
| Lateral septal nucleus, rostral (rostroventral) part | 43823 | 135 |
| Reticular nucleus of the thalamus                    | 43825 | 137 |
| Anteroventral preoptic nucleus                       | 43826 | 138 |
| Lateral septal nucleus, ventral part                 | 43827 | 139 |
| Nucleus sagulum                                      | 43830 | 142 |
| Anteroventral periventricular nucleus                | 43831 | 143 |
| Barrington's nucleus                                 | 43834 | 146 |
| Anteromedial visual area                             | 43835 | 147 |
| Suprachiasmatic nucleus                              | 43836 | 148 |
| Bed nucleus of the anterior commissure               | 43837 | 149 |
| Bed nucleus of the accessory olfactory tract         | 43840 | 152 |
| Magnocellular nucleus                                | 43842 | 154 |
| stria terminalis                                     | 43843 | 155 |
| Basolateral amygdalar nucleus, anterior part         | 43844 | 156 |
| Magnocellular reticular nucleus                      | 43847 | 159 |
| Basolateral amygdalar nucleus, posterior part        | 43849 | 161 |
| Supragenual nucleus                                  | 43852 | 164 |
| Primary motor area                                   | 43853 | 165 |
| Subgeniculate nucleus                                | 43854 | 166 |
| Suprageniculate nucleus                              | 43855 | 167 |
| superior cerebelar peduncles                         | 43856 | 168 |
| Basomedial amygdalar nucleus, anterior part          | 43857 | 169 |
| Accessory supraoptic group                           | 43860 | 172 |
| Septohippocampal nucleus                             | 43861 | 173 |
| Basomedial amygdalar nucleus, posterior part         | 43862 | 174 |
| Substantia innominata                                | 43866 | 178 |
| Subparaventricular zone                              | 43868 | 180 |
| supraoptic commissures                               | 43869 | 181 |
| Subceruleus nucleus                                  | 43870 | 182 |
| Bed nuclei of the stria terminalis                   | 43871 | 183 |
| Preparasubthalamic nucleus                           | 43874 | 186 |
| Sublaterodorsal nucleus                              | 43875 | 187 |
| Mediodorsal nucleus of thalamus                      | 43876 | 188 |

|                                                   |       |     |
|---------------------------------------------------|-------|-----|
| Parasubthalamic nucleus                           | 43878 | 190 |
| Submedial nucleus of the thalamus                 | 43879 | 191 |
| Infracerebellar nucleus                           | 43881 | 193 |
| Substantia nigra, compact part                    | 43882 | 194 |
| cuneate fascicle                                  | 43884 | 196 |
| Substantia nigra, reticular part                  | 43885 | 197 |
| Field CA1                                         | 43886 | 198 |
| Supraoptic nucleus                                | 43887 | 199 |
| Medial amygdalar nucleus                          | 43891 | 203 |
| vestibular nerve                                  | 43893 | 205 |
| Subparafascicular nucleus                         | 43894 | 206 |
| Lateral visual area                               | 43895 | 207 |
| Field CA2                                         | 43897 | 209 |
| medial corticohypothalamic tract                  | 43899 | 211 |
| Spinal nucleus of the trigeminal, caudal part     | 43900 | 212 |
| columns of the fornix                             | 43904 | 216 |
| Spinal nucleus of the trigeminal, interpolar part | 43905 | 217 |
| Retrosplenial area, dorsal part                   | 43908 | 220 |
| Spinal nucleus of the trigeminal, oral part       | 43910 | 222 |
| Orbital area, lateral part                        | 43911 | 223 |
| Primary somatosensory area, upper limb            | 43913 | 225 |
| Basolateral amygdalar nucleus, ventral part       | 43914 | 226 |
| Midbrain trigeminal nucleus                       | 43917 | 229 |
| Field CA3                                         | 43919 | 231 |
| alveus                                            | 43920 | 232 |
| Subthalamic nucleus                               | 43922 | 234 |
| brachium of the inferior colliculus               | 43925 | 237 |
| Medial habenula                                   | 43926 | 238 |
| Orbital area, medial part                         | 43927 | 239 |
| Subiculum                                         | 43930 | 242 |
| dorsal acoustic stria                             | 43931 | 243 |
| Main olfactory bulb                               | 43932 | 244 |
| Medial preoptic nucleus                           | 43935 | 247 |
| Medial preoptic area                              | 43937 | 249 |
| Supramammillary nucleus                           | 43938 | 250 |
| Entorhinal area, medial part, dorsal zone         | 43939 | 251 |
| Dorsal auditory area                              | 43940 | 252 |
| Medial pretectal area                             | 43942 | 254 |
| Supratrigeminal nucleus                           | 43943 | 255 |
| dorsal limb                                       | 43944 | 256 |

|                                                       |       |     |
|-------------------------------------------------------|-------|-----|
| Perirhinal area                                       | 43945 | 257 |
| Retrosplenial area, ventral part                      | 43946 | 258 |
| Central amygdalar nucleus                             | 43948 | 260 |
| dorsal spinocerebellar tract                          | 43951 | 263 |
| Primary somatosensory area, nose                      | 43953 | 265 |
| Postpiriform transition area                          | 43957 | 269 |
| Tegmental reticular nucleus                           | 43959 | 271 |
| Central lateral nucleus of the thalamus               | 43960 | 272 |
| Accessory facial motor nucleus                        | 43961 | 273 |
| external capsule                                      | 43963 | 275 |
| Nucleus of the brachium of the inferior colliculus    | 43964 | 276 |
| Clastrum                                              | 43967 | 279 |
| Nucleus of Darkschewitsch                             | 43968 | 280 |
| Anterior cingulate area, ventral part                 | 43969 | 281 |
| Primary visual area                                   | 43972 | 284 |
| fasciculus retroflexus                                | 43973 | 285 |
| Diagonal band nucleus                                 | 43974 | 286 |
| Taenia tecta, dorsal part                             | 43975 | 287 |
| Central medial nucleus of the thalamus                | 43977 | 289 |
| fimbria                                               | 43980 | 292 |
| Nucleus incertus                                      | 43981 | 293 |
| Taenia tecta, ventral part                            | 43982 | 294 |
| Subparafascicular area                                | 43984 | 296 |
| Nucleus of the lateral lemniscus                      | 43987 | 299 |
| Tuberal nucleus                                       | 43989 | 301 |
| Cuneiform nucleus                                     | 43990 | 302 |
| Motor nucleus of trigeminal                           | 43992 | 304 |
| Nucleus of the optic tract                            | 43995 | 307 |
| Ventral anterior-lateral complex of the thalamus      | 43996 | 308 |
| Dentate gyrus                                         | 43998 | 310 |
| Nucleus of the posterior commissure                   | 44000 | 312 |
| Cortical amygdalar area, anterior part                | 44002 | 314 |
| Nucleus of the trapezoid body                         | 44003 | 315 |
| Nucleus of the solitary tract                         | 44007 | 319 |
| Abducens nucleus                                      | 44008 | 320 |
| Cortical amygdalar area, posterior part, lateral zone | 44010 | 322 |
| Secondary motor area                                  | 44011 | 323 |
| lateral lemniscus                                     | 44013 | 325 |
| Facial motor nucleus                                  | 44014 | 326 |
| Cortical amygdalar area, posterior part, medial zone  | 44016 | 328 |



|                                                |       |     |
|------------------------------------------------|-------|-----|
| lateral olfactory tract, body                  | 44018 | 330 |
| Retrosplenial area, lateral agranular part     | 44021 | 333 |
| Caudoputamen                                   | 44022 | 334 |
| mammillary peduncle                            | 44023 | 335 |
| Superior central nucleus raphe                 | 44026 | 338 |
| mammillotegmental tract                        | 44028 | 340 |
| Ventral medial nucleus of the thalamus         | 44029 | 341 |
| Ventrolateral preoptic nucleus                 | 44031 | 343 |
| mammillothalamic tract                         | 44032 | 344 |
| Ventromedial hypothalamic nucleus              | 44034 | 346 |
| Posterior auditory area                        | 44036 | 348 |
| medial lemniscus                               | 44037 | 349 |
| Cortical subplate                              | 44041 | 353 |
| Agranular insular area, ventral part           | 44042 | 354 |
| Olivary pretectal nucleus                      | 44043 | 355 |
| Infralimbic area                               | 44044 | 356 |
| Cuneate nucleus                                | 44045 | 357 |
| Ventral posterolateral nucleus of the thalamus | 44046 | 358 |
| Ventral posteromedial nucleus of the thalamus  | 44053 | 365 |
| Primary auditory area                          | 44054 | 366 |
| Ventral tegmental area                         | 44058 | 370 |
| Posterolateral visual area                     | 44059 | 371 |
| principal mammillary tract                     | 44060 | 372 |
| Olfactory tubercle                             | 44061 | 373 |
| Ventral tegmental nucleus                      | 44063 | 375 |
| Nucleus x                                      | 44066 | 378 |
| Posterior amygdalar nucleus                    | 44073 | 385 |
| Nucleus y                                      | 44074 | 386 |
| corticospinal tract                            | 44076 | 388 |
| Piriform-amygdalar area                        | 44078 | 390 |
| spinal tract of the trigeminal nerve           | 44080 | 392 |
| Zona incerta                                   | 44082 | 394 |
| facial nerve                                   | 44083 | 395 |
| stria medullaris                               | 44085 | 397 |
| Fields of Forel                                | 44087 | 399 |
| posteromedial visual area                      | 44088 | 400 |
| Inferior colliculus                            | 44091 | 403 |
| Dorsal peduncular area                         | 44093 | 405 |
| Dorsomedial nucleus of the hypothalamus        | 44100 | 412 |
| oculomotor nerve                               | 44102 | 414 |

|                                               |       |     |
|-----------------------------------------------|-------|-----|
| Ectorhinal area                               | 44104 | 416 |
| Dorsal motor nucleus of the vagus nerve       | 44106 | 418 |
| trapezoid body                                | 44107 | 419 |
| Parasubiculum                                 | 44109 | 421 |
| Dentate nucleus                               | 44111 | 423 |
| optic nerve                                   | 44113 | 425 |
| uncinate fascicle                             | 44115 | 427 |
| Parvicellular reticular nucleus               | 44117 | 429 |
| Parasolitary nucleus                          | 44120 | 432 |
| rubrospinal tract                             | 44122 | 434 |
| ventral spinocerebellar tract                 | 44123 | 435 |
| Parabrachial nucleus                          | 44124 | 436 |
| Dorsal nucleus raphe                          | 44126 | 438 |
| Supplemental somatosensory area               | 44127 | 439 |
| Parabigeminal nucleus                         | 44128 | 440 |
| Primary somatosensory area, mouth             | 44129 | 441 |
| Dorsal tegmental nucleus                      | 44130 | 442 |
| amygdalar capsule                             | 44132 | 444 |
| Visceral area                                 | 44136 | 448 |
| Pontine central gray                          | 44137 | 449 |
| External cuneate nucleus                      | 44140 | 452 |
| Paracentral nucleus                           | 44143 | 455 |
| trochlear nerve                               | 44146 | 458 |
| Lingula (I)                                   | 44147 | 459 |
| Posterodorsal preoptic nucleus                | 44148 | 460 |
| brachium of the superior colliculus           | 44149 | 461 |
| cerebral peduncle                             | 44151 | 463 |
| Parafascicular nucleus                        | 44154 | 466 |
| Pontine gray                                  | 44155 | 467 |
| Anterior cingulate area                       | 44156 | 468 |
| Nucleus ambiguus, dorsal division             | 44158 | 470 |
| cingulum bundle                               | 44159 | 471 |
| Posterior hypothalamic nucleus                | 44163 | 475 |
| vomeronasal nerve                             | 44164 | 476 |
| Endopiriform nucleus, dorsal part             | 44167 | 479 |
| Lateral reticular nucleus, magnocellular part | 44169 | 481 |
| Ventral auditory area                         | 44172 | 484 |
| Piriform area                                 | 44173 | 485 |
| Lateral reticular nucleus, parvicellular part | 44175 | 487 |
| Endopiriform nucleus, ventral part            | 44178 | 490 |

|                                                     |       |     |
|-----------------------------------------------------|-------|-----|
| Orbital area, ventrolateral part                    | 44180 | 492 |
| Paragigantocellular reticular nucleus, dorsal part  | 44181 | 493 |
| Paragigantocellular reticular nucleus, lateral part | 44188 | 500 |
| Dorsal premammillary nucleus                        | 44189 | 501 |
| Primary somatosensory area, barrel field            | 44190 | 502 |
| Fasciola cinerea                                    | 44191 | 503 |
| Fastigial nucleus                                   | 44195 | 507 |
| Agranular insular area, dorsal part                 | 44197 | 509 |
| Fundus of striatum                                  | 44199 | 511 |
| Ventral premammillary nucleus                       | 44200 | 512 |
| Primary somatosensory area, trunk                   | 44202 | 514 |
| Simple lobule                                       | 44203 | 515 |
| olfactory nerve layer of main olfactory bulb        | 44207 | 519 |
| Posterior complex of the thalamus                   | 44208 | 520 |
| Globus pallidus, external segment                   | 44210 | 522 |
| Paramedian lobule                                   | 44212 | 524 |
| Posterior limiting nucleus of the thalamus          | 44214 | 526 |
| Primary somatosensory area, lower limb              | 44215 | 527 |
| Globus pallidus, internal segment                   | 44216 | 528 |
| Copula pyramidis                                    | 44217 | 529 |
| Postsubiculum                                       | 44219 | 531 |
| Gracile nucleus                                     | 44221 | 533 |
| Paraflocculus                                       | 44222 | 534 |
| crossed tectospinal pathway                         | 44223 | 535 |
| Peripeduncular nucleus                              | 44224 | 536 |
| Gigantocellular reticular nucleus                   | 44228 | 540 |
| Flocculus                                           | 44229 | 541 |
| Pedunclopontine nucleus                             | 44231 | 542 |
| Crus 1                                              | 44233 | 544 |
| Posterior pretectal nucleus                         | 44236 | 547 |
| Crus 2                                              | 44238 | 549 |
| Parapyramidal nucleus                               | 44240 | 551 |
| Medial geniculate complex, dorsal part              | 44242 | 553 |
| Anterolateral visual area                           | 44243 | 554 |
| Perireunensis nucleus                               | 44244 | 555 |
| Medial geniculate complex, ventral part             | 44245 | 556 |
| Presubiculum                                        | 44247 | 558 |
| Medial geniculate complex, medial part              | 44250 | 561 |
| Hippocampal formation                               | 44251 | 562 |
| external medullary lamina of the thalamus           | 44254 | 565 |

|                                               |       |     |
|-----------------------------------------------|-------|-----|
| Pontine reticular nucleus, caudal part        | 44255 | 566 |
| Anteromedial nucleus, dorsal part             | 44257 | 568 |
| Medullary reticular nucleus, dorsal part      | 44259 | 570 |
| Anteromedial nucleus, ventral part            | 44262 | 573 |
| Intercalated amygdalar nucleus                | 44263 | 574 |
| Medullary reticular nucleus, ventral part     | 44265 | 576 |
| Parastrial nucleus                            | 44267 | 578 |
| Interanterodorsal nucleus of the thalamus     | 44269 | 580 |
| Entorhinal area, lateral part                 | 44273 | 584 |
| inferior cerebellar peduncle                  | 44274 | 585 |
| Tuberomammillary nucleus, dorsal part         | 44276 | 587 |
| Nucleus of the lateral olfactory tract        | 44279 | 590 |
| Primary somatosensory area, unassigned        | 44283 | 594 |
| Anterior area                                 | 44289 | 600 |
| Laterointermediate area                       | 44295 | 606 |
| Rostrolateral area                            | 44301 | 612 |
| Postrhinal area                               | 44307 | 618 |
| Prosubiculum                                  | 44313 | 624 |
| Area prostriata                               | 44314 | 625 |
| supra-callosal cerebral white matter          | 44315 | 626 |
| optic radiation                               | 44317 | 628 |
| auditory radiation                            | 44318 | 629 |
| commissural branch of stria terminalis        | 44319 | 630 |
| Dorsal part of the lateral geniculate complex | 44321 | 632 |
| Retroparafascicular nucleus                   | 44327 | 638 |
| Medial accessory oculomotor nucleus           | 44328 | 639 |
| Peritrigeminal zone                           | 44329 | 640 |
| Accessory trigeminal nucleus                  | 44330 | 641 |
| Parvicellular motor 5 nucleus                 | 44331 | 642 |
| Intertrigeminal nucleus                       | 44332 | 643 |
| Ethmoid nucleus of the thalamus               | 44333 | 644 |
| Xiphoid thalamic nucleus                      | 44334 | 645 |
| Posterior intralaminar thalamic nucleus       | 44335 | 646 |
| Posterior triangular thalamic nucleus         | 44336 | 647 |
| Intermediate geniculate nucleus               | 44337 | 648 |
| Ventromedial preoptic nucleus                 | 44338 | 649 |
| Perifornical nucleus                          | 44339 | 650 |
| Hippocampo-amygdalar transition area          | 44340 | 651 |
| Paratrigeminal nucleus                        | 44341 | 652 |
| Vestibulocerebellar nucleus                   | 44342 | 653 |

|                                          |       |       |
|------------------------------------------|-------|-------|
| Posterodorsal tegmental nucleus          | 44344 | 655   |
| Medial mammillary nucleus                | 44348 | 659   |
| Paratrochlear nucleus                    | 44349 | 660   |
| Paranigral nucleus                       | 44350 | 661   |
| Supraoculomotor periaqueductal gray      | 44359 | 670   |
| Interfascicular nucleus raphe            | 21846 | 21846 |
| Induseum griseum                         | 21848 | 21848 |
| Intermediodorsal nucleus of the thalamus | 21853 | 21853 |
| Interpeduncular nucleus                  | 21856 | 21856 |
| optic chiasm                             | 21858 | 21858 |
| third ventricle                          | 21861 | 21861 |
| cerebral aqueduct                        | 21863 | 21863 |
| fourth ventricle                         | 21864 | 21864 |
| posterior commissure                     | 21866 | 21866 |
| central canal, spinal cord/medulla       | 21868 | 21868 |
| Rhomboid nucleus                         | 21873 | 21873 |
| Rostral linear nucleus raphe             | 21874 | 21874 |
| pyramidal decussation                    | 21875 | 21875 |
| Nucleus raphe magnus                     | 21876 | 21876 |
| Nucleus raphe obscurus                   | 21878 | 21878 |
| Nucleus raphe pallidus                   | 21880 | 21880 |
| Nucleus raphe pontis                     | 21881 | 21881 |
| Septofimbrial nucleus                    | 21884 | 21884 |
| superior colliculus commissure           | 21886 | 21886 |
| Subfornical organ                        | 21887 | 21887 |
| dorsal hippocampal commissure            | 21891 | 21891 |
| ventral hippocampal commissure           | 21892 | 21892 |
| Median preoptic nucleus                  | 21893 | 21893 |
| dorsal fornix                            | 21898 | 21898 |
| Medial septal nucleus                    | 21901 | 21901 |
| Triangular nucleus of septum             | 21902 | 21902 |
| Central linear nucleus raphe             | 21904 | 21904 |
| habenular commissure                     | 21911 | 21911 |
| inferior colliculus commissure           | 21912 | 21912 |
| arbor vitae                              | 21918 | 21918 |
| cerebellar commissure                    | 21920 | 21920 |
| Vascular organ of the lamina terminalis  | 21921 | 21921 |
| Hypoglossal nucleus                      | 21923 | 21923 |
| Periaqueductal gray                      | 21924 | 21924 |
| superior cerebellar peduncle decussation | 21925 | 21925 |

|                                           |       |       |
|-------------------------------------------|-------|-------|
| anterior commissure                       | 21933 | 21933 |
| Declive (VI)                              | 21937 | 21937 |
| Folium-tuber vermis (VII)                 | 21938 | 21938 |
| Pyramus (VIII)                            | 21940 | 21940 |
| Uvula (IX)                                | 21941 | 21941 |
| Nodulus (X)                               | 21942 | 21942 |
| Etinger-Westphal nucleus                  | 21943 | 21943 |
| Lobule II                                 | 21944 | 21944 |
| Lobule III                                | 21945 | 21945 |
| root                                      | 21947 | 21947 |
| fiber tracts                              | 21948 | 21948 |
| doral tegmental decussation               | 21951 | 21951 |
| Lobules IV-V                              | 21952 | 21952 |
| Interanteromedial nucleus of the thalamus | 21955 | 21955 |
| Median eminence                           | 21956 | 21956 |
| corpus callosum                           | 21957 | 21957 |
| Subcommissural organ                      | 21959 | 21959 |
| ventral tegmental decussation             | 21965 | 21965 |

Supplementary Table 4

| Tissue           | Gene  | Sex    | Age   | r        | p        | FDR      |
|------------------|-------|--------|-------|----------|----------|----------|
| Cortex           | AHSA1 | Female | Aged  | 0.801678 | 5.95E-08 | 5.44E-07 |
| Cortex           | AHSA1 | Male   | Aged  | 0.622588 | 1.07E-06 | 7.03E-06 |
| Cortex           | AHSA1 | Female | Young | 0.583773 | 0.00434  | 0.010787 |
| Cortex           | AHSA1 | Male   | Young | 0.67189  | 3.55E-10 | 5.35E-09 |
| Substantia nigra | AHSA1 | Female | Aged  | 0.1444   | 0.637883 | 0.745653 |
| Substantia nigra | AHSA1 | Male   | Aged  | 0.475834 | 0.012116 | 0.026286 |
| Substantia nigra | AHSA1 | Female | Young | 0.744607 | 0.002251 | 0.005881 |
| Substantia nigra | AHSA1 | Male   | Young | 0.3932   | 0.063435 | 0.116829 |
| Putamen          | AHSA1 | Female | Aged  | 0.856728 | 2.26E-05 | 9.79E-05 |
| Putamen          | AHSA1 | Male   | Aged  | 0.418129 | 0.011159 | 0.024851 |
| Putamen          | AHSA1 | Female | Young | 0.518991 | 0.039399 | 0.075269 |
| Putamen          | AHSA1 | Male   | Young | 0.789463 | 5.20E-10 | 7.39E-09 |
| Amygdala         | AHSA1 | Female | Aged  | 0.535101 | 0.022122 | 0.045305 |
| Amygdala         | AHSA1 | Male   | Aged  | 0.617745 | 0.001001 | 0.002815 |
| Amygdala         | AHSA1 | Female | Young | 0.14955  | 0.625807 | 0.734893 |
| Amygdala         | AHSA1 | Male   | Young | 0.341152 | 0.060355 | 0.111964 |
| Cortex           | BAG3  | Female | Aged  | -0.24707 | 0.180247 | 0.284835 |
| Cortex           | BAG3  | Male   | Aged  | -0.13841 | 0.332737 | 0.481246 |
| Cortex           | BAG3  | Female | Young | -0.20688 | 0.355609 | 0.498672 |
| Cortex           | BAG3  | Male   | Young | -0.08296 | 0.501201 | 0.622852 |
| Substantia nigra | BAG3  | Female | Aged  | -0.27245 | 0.367823 | 0.503544 |
| Substantia nigra | BAG3  | Male   | Aged  | 0.006989 | 0.972402 | 0.987837 |
| Substantia nigra | BAG3  | Female | Young | -0.24599 | 0.396594 | 0.528792 |
| Substantia nigra | BAG3  | Male   | Young | -0.12222 | 0.57851  | 0.695298 |
| Putamen          | BAG3  | Female | Aged  | 0.022054 | 0.935388 | 0.969471 |
| Putamen          | BAG3  | Male   | Aged  | -0.01428 | 0.934117 | 0.969471 |
| Putamen          | BAG3  | Female | Young | 0.012822 | 0.962411 | 0.981583 |
| Putamen          | BAG3  | Male   | Young | -0.12312 | 0.437274 | 0.562524 |
| Amygdala         | BAG3  | Female | Aged  | -0.13715 | 0.587363 | 0.70264  |
| Amygdala         | BAG3  | Male   | Aged  | -0.17946 | 0.390704 | 0.526639 |
| Amygdala         | BAG3  | Female | Young | -0.38394 | 0.195263 | 0.306131 |
| Amygdala         | BAG3  | Male   | Young | -0.22111 | 0.231956 | 0.353457 |
| Cortex           | CDC37 | Female | Aged  | 0.167579 | 0.367537 | 0.503544 |
| Cortex           | CDC37 | Male   | Aged  | 0.682148 | 3.54E-08 | 3.49E-07 |
| Cortex           | CDC37 | Female | Young | 0.691122 | 0.000369 | 0.001194 |
| Cortex           | CDC37 | Male   | Young | 0.406951 | 0.000573 | 0.00179  |
| Substantia nigra | CDC37 | Female | Aged  | 0.784006 | 0.001514 | 0.004167 |
| Substantia nigra | CDC37 | Male   | Aged  | 0.721295 | 2.18E-05 | 9.64E-05 |
| Substantia nigra | CDC37 | Female | Young | 0.746797 | 0.002149 | 0.005731 |
| Substantia nigra | CDC37 | Male   | Young | 0.740952 | 5.25E-05 | 0.000207 |
| Putamen          | CDC37 | Female | Aged  | 0.864958 | 1.53E-05 | 7.23E-05 |
| Putamen          | CDC37 | Male   | Aged  | 0.522386 | 0.001082 | 0.003012 |
| Putamen          | CDC37 | Female | Young | 0.5071   | 0.044979 | 0.085293 |
| Putamen          | CDC37 | Male   | Young | 0.82529  | 1.78E-11 | 3.50E-10 |
| Amygdala         | CDC37 | Female | Aged  | 0.818055 | 3.35E-05 | 0.000136 |

|                  |          |        |       |          |          |          |
|------------------|----------|--------|-------|----------|----------|----------|
| Amygdala         | CDC37    | Male   | Aged  | 0.76383  | 8.87E-06 | 4.45E-05 |
| Amygdala         | CDC37    | Female | Young | 0.559866 | 0.046618 | 0.087752 |
| Amygdala         | CDC37    | Male   | Young | 0.681018 | 2.48E-05 | 0.000106 |
| Cortex           | DNAJB1   | Female | Aged  | 0.00234  | 0.990034 | 0.996023 |
| Cortex           | DNAJB1   | Male   | Aged  | -0.08427 | 0.556596 | 0.675302 |
| Cortex           | DNAJB1   | Female | Young | -0.1143  | 0.612508 | 0.725935 |
| Cortex           | DNAJB1   | Male   | Young | 0.001274 | 0.991774 | 0.996023 |
| Substantia nigra | DNAJB1   | Female | Aged  | -0.24826 | 0.413447 | 0.542782 |
| Substantia nigra | DNAJB1   | Male   | Aged  | 0.124678 | 0.535509 | 0.655935 |
| Substantia nigra | DNAJB1   | Female | Young | -0.34769 | 0.223179 | 0.342118 |
| Substantia nigra | DNAJB1   | Male   | Young | 0.099675 | 0.65091  | 0.753995 |
| Putamen          | DNAJB1   | Female | Aged  | 0.076997 | 0.776851 | 0.868445 |
| Putamen          | DNAJB1   | Male   | Aged  | 0.047957 | 0.781205 | 0.869515 |
| Putamen          | DNAJB1   | Female | Young | -0.01913 | 0.943938 | 0.974388 |
| Putamen          | DNAJB1   | Male   | Young | 0.031046 | 0.845254 | 0.916351 |
| Amygdala         | DNAJB1   | Female | Aged  | 0.042656 | 0.866537 | 0.924306 |
| Amygdala         | DNAJB1   | Male   | Aged  | -0.20657 | 0.321817 | 0.473477 |
| Amygdala         | DNAJB1   | Female | Young | -0.39809 | 0.17791  | 0.284656 |
| Amygdala         | DNAJB1   | Male   | Young | -0.18219 | 0.32661  | 0.475069 |
| Cortex           | FKBP5    | Female | Aged  | -0.42375 | 0.017524 | 0.037385 |
| Cortex           | FKBP5    | Male   | Aged  | -0.35433 | 0.01074  | 0.024332 |
| Cortex           | FKBP5    | Female | Young | -0.3367  | 0.125465 | 0.224609 |
| Cortex           | FKBP5    | Male   | Young | -0.48692 | 2.55E-05 | 0.000107 |
| Substantia nigra | FKBP5    | Female | Aged  | 0.173131 | 0.571643 | 0.690286 |
| Substantia nigra | FKBP5    | Male   | Aged  | 0.105223 | 0.601436 | 0.716129 |
| Substantia nigra | FKBP5    | Female | Young | -0.3523  | 0.216694 | 0.334179 |
| Substantia nigra | FKBP5    | Male   | Young | -0.18733 | 0.392047 | 0.526639 |
| Putamen          | FKBP5    | Female | Aged  | -0.05732 | 0.833002 | 0.916351 |
| Putamen          | FKBP5    | Male   | Aged  | 0.472582 | 0.003609 | 0.00924  |
| Putamen          | FKBP5    | Female | Young | 0.189345 | 0.48247  | 0.602499 |
| Putamen          | FKBP5    | Male   | Young | 0.132593 | 0.402552 | 0.533956 |
| Amygdala         | FKBP5    | Female | Aged  | 0.339954 | 0.1675   | 0.27312  |
| Amygdala         | FKBP5    | Male   | Aged  | -0.01295 | 0.95102  | 0.977756 |
| Amygdala         | FKBP5    | Female | Young | 0.060556 | 0.844207 | 0.916351 |
| Amygdala         | FKBP5    | Male   | Young | -0.07146 | 0.702465 | 0.806418 |
| Cortex           | HSP90AA1 | Female | Aged  | 0.449602 | 0.011163 | 0.024851 |
| Cortex           | HSP90AA1 | Male   | Aged  | 0.45673  | 0.000755 | 0.002246 |
| Cortex           | HSP90AA1 | Female | Young | -0.04105 | 0.856054 | 0.916945 |
| Cortex           | HSP90AA1 | Male   | Young | 0.588624 | 1.30E-07 | 1.07E-06 |
| Substantia nigra | HSP90AA1 | Female | Aged  | 0.001734 | 0.995513 | 0.996023 |
| Substantia nigra | HSP90AA1 | Male   | Aged  | 0.608146 | 0.000765 | 0.00225  |
| Substantia nigra | HSP90AA1 | Female | Young | 0.600215 | 0.023246 | 0.04723  |
| Substantia nigra | HSP90AA1 | Male   | Young | 0.477449 | 0.021227 | 0.04418  |
| Putamen          | HSP90AA1 | Female | Aged  | 0.647494 | 0.006693 | 0.015719 |
| Putamen          | HSP90AA1 | Male   | Aged  | 0.319878 | 0.057191 | 0.106869 |
| Putamen          | HSP90AA1 | Female | Young | 0.389702 | 0.135674 | 0.235177 |
| Putamen          | HSP90AA1 | Male   | Young | 0.680584 | 7.09E-07 | 5.06E-06 |



|                  |          |        |       |          |          |          |
|------------------|----------|--------|-------|----------|----------|----------|
| Amygdala         | HSP90AA1 | Female | Aged  | 0.3176   | 0.199041 | 0.308816 |
| Amygdala         | HSP90AA1 | Male   | Aged  | 0.418662 | 0.037258 | 0.071715 |
| Amygdala         | HSP90AA1 | Female | Young | -0.23686 | 0.435896 | 0.562524 |
| Amygdala         | HSP90AA1 | Male   | Young | 0.152942 | 0.411419 | 0.542782 |
| Cortex           | HSP90AB1 | Female | Aged  | 0.415542 | 0.020082 | 0.04214  |
| Cortex           | HSP90AB1 | Male   | Aged  | 0.779474 | 1.60E-11 | 3.42E-10 |
| Cortex           | HSP90AB1 | Female | Young | 0.662024 | 0.00079  | 0.002299 |
| Cortex           | HSP90AB1 | Male   | Young | 0.767174 | 2.36E-14 | 1.51E-12 |
| Substantia nigra | HSP90AB1 | Female | Aged  | 0.286926 | 0.341867 | 0.49029  |
| Substantia nigra | HSP90AB1 | Male   | Aged  | 0.75166  | 6.20E-06 | 3.24E-05 |
| Substantia nigra | HSP90AB1 | Female | Young | 0.871965 | 4.80E-05 | 0.000192 |
| Substantia nigra | HSP90AB1 | Male   | Young | 0.835208 | 7.12E-07 | 5.06E-06 |
| Putamen          | HSP90AB1 | Female | Aged  | 0.915836 | 6.41E-07 | 4.82E-06 |
| Putamen          | HSP90AB1 | Male   | Aged  | 0.416941 | 0.011415 | 0.025191 |
| Putamen          | HSP90AB1 | Female | Young | 0.528942 | 0.035144 | 0.068678 |
| Putamen          | HSP90AB1 | Male   | Young | 0.803949 | 1.44E-10 | 2.46E-09 |
| Amygdala         | HSP90AB1 | Female | Aged  | 0.616423 | 0.006442 | 0.01527  |
| Amygdala         | HSP90AB1 | Male   | Aged  | 0.716116 | 5.68E-05 | 0.00022  |
| Amygdala         | HSP90AB1 | Female | Young | 0.428359 | 0.144192 | 0.244559 |
| Amygdala         | HSP90AB1 | Male   | Young | 0.651709 | 7.14E-05 | 0.000269 |
| Cortex           | HSPA1A   | Female | Aged  | -0.20342 | 0.272397 | 0.403085 |
| Cortex           | HSPA1A   | Male   | Aged  | -0.18403 | 0.196115 | 0.306131 |
| Cortex           | HSPA1A   | Female | Young | -0.17149 | 0.445411 | 0.564481 |
| Cortex           | HSPA1A   | Male   | Young | -0.09311 | 0.450141 | 0.564883 |
| Substantia nigra | HSPA1A   | Female | Aged  | -0.28421 | 0.346651 | 0.49029  |
| Substantia nigra | HSPA1A   | Male   | Aged  | 0.120791 | 0.548404 | 0.66853  |
| Substantia nigra | HSPA1A   | Female | Young | -0.4056  | 0.150192 | 0.252955 |
| Substantia nigra | HSPA1A   | Male   | Young | -0.1012  | 0.645894 | 0.751585 |
| Putamen          | HSPA1A   | Female | Aged  | 0.08314  | 0.759519 | 0.852793 |
| Putamen          | HSPA1A   | Male   | Aged  | -0.00862 | 0.960186 | 0.981583 |
| Putamen          | HSPA1A   | Female | Young | -0.02965 | 0.913194 | 0.962048 |
| Putamen          | HSPA1A   | Male   | Young | -0.0555  | 0.726999 | 0.830856 |
| Amygdala         | HSPA1A   | Female | Aged  | -0.19681 | 0.433765 | 0.562524 |
| Amygdala         | HSPA1A   | Male   | Aged  | -0.23866 | 0.250603 | 0.377378 |
| Amygdala         | HSPA1A   | Female | Young | -0.43414 | 0.138267 | 0.237559 |
| Amygdala         | HSPA1A   | Male   | Young | -0.25616 | 0.164233 | 0.269511 |
| Cortex           | HSPA1B   | Female | Aged  | -0.17143 | 0.356472 | 0.498672 |
| Cortex           | HSPA1B   | Male   | Aged  | -0.12221 | 0.392922 | 0.526639 |
| Cortex           | HSPA1B   | Female | Young | -0.21968 | 0.325953 | 0.475069 |
| Cortex           | HSPA1B   | Male   | Young | -0.03231 | 0.793675 | 0.87957  |
| Substantia nigra | HSPA1B   | Female | Aged  | -0.26612 | 0.379485 | 0.516745 |
| Substantia nigra | HSPA1B   | Male   | Aged  | 0.160964 | 0.422514 | 0.551855 |
| Substantia nigra | HSPA1B   | Female | Young | -0.31675 | 0.269859 | 0.401651 |
| Substantia nigra | HSPA1B   | Male   | Young | 0.041205 | 0.85192  | 0.916351 |
| Putamen          | HSPA1B   | Female | Aged  | 0.084162 | 0.756645 | 0.852793 |
| Putamen          | HSPA1B   | Male   | Aged  | 0.023703 | 0.890856 | 0.946304 |
| Putamen          | HSPA1B   | Female | Young | -0.05434 | 0.841582 | 0.916351 |

|                  |        |        |       |          |          |          |
|------------------|--------|--------|-------|----------|----------|----------|
| Putamen          | HSPA1B | Male   | Young | 0.000793 | 0.996023 | 0.996023 |
| Amygdala         | HSPA1B | Female | Aged  | -0.12353 | 0.625302 | 0.734893 |
| Amygdala         | HSPA1B | Male   | Aged  | -0.24033 | 0.247186 | 0.374436 |
| Amygdala         | HSPA1B | Female | Young | -0.4283  | 0.144252 | 0.244559 |
| Amygdala         | HSPA1B | Male   | Young | -0.17621 | 0.343025 | 0.49029  |
| Cortex           | HSPB1  | Female | Aged  | -0.41024 | 0.021893 | 0.045198 |
| Cortex           | HSPB1  | Male   | Aged  | -0.25279 | 0.073499 | 0.134398 |
| Cortex           | HSPB1  | Female | Young | -0.55851 | 0.0069   | 0.016059 |
| Cortex           | HSPB1  | Male   | Young | -0.41829 | 0.000386 | 0.001235 |
| Substantia nigra | HSPB1  | Female | Aged  | -0.23238 | 0.444886 | 0.564481 |
| Substantia nigra | HSPB1  | Male   | Aged  | 0.038356 | 0.849353 | 0.916351 |
| Substantia nigra | HSPB1  | Female | Young | -0.38858 | 0.169737 | 0.275017 |
| Substantia nigra | HSPB1  | Male   | Young | -0.13797 | 0.530149 | 0.652491 |
| Putamen          | HSPB1  | Female | Aged  | 0.022195 | 0.934974 | 0.969471 |
| Putamen          | HSPB1  | Male   | Aged  | 0.053618 | 0.756121 | 0.852793 |
| Putamen          | HSPB1  | Female | Young | -0.02646 | 0.922524 | 0.967894 |
| Putamen          | HSPB1  | Male   | Young | -0.14947 | 0.344771 | 0.49029  |
| Amygdala         | HSPB1  | Female | Aged  | -0.10955 | 0.665229 | 0.767111 |
| Amygdala         | HSPB1  | Male   | Aged  | -0.15885 | 0.448196 | 0.564883 |
| Amygdala         | HSPB1  | Female | Young | -0.39855 | 0.177368 | 0.284656 |
| Amygdala         | HSPB1  | Male   | Young | -0.20534 | 0.267784 | 0.400893 |
| Cortex           | PPIA   | Female | Aged  | 0.534862 | 0.001935 | 0.00527  |
| Cortex           | PPIA   | Male   | Aged  | 0.781435 | 1.32E-11 | 3.07E-10 |
| Cortex           | PPIA   | Female | Young | 0.832488 | 1.54E-06 | 8.97E-06 |
| Cortex           | PPIA   | Male   | Young | 0.553109 | 1.00E-06 | 6.75E-06 |
| Substantia nigra | PPIA   | Female | Aged  | 0.879768 | 7.33E-05 | 0.000272 |
| Substantia nigra | PPIA   | Male   | Aged  | 0.783333 | 1.36E-06 | 8.28E-06 |
| Substantia nigra | PPIA   | Female | Young | 0.935757 | 8.83E-07 | 6.11E-06 |
| Substantia nigra | PPIA   | Male   | Young | 0.790577 | 7.15E-06 | 3.66E-05 |
| Putamen          | PPIA   | Female | Aged  | 0.818879 | 0.000105 | 0.000367 |
| Putamen          | PPIA   | Male   | Aged  | 0.883218 | 1.01E-12 | 2.86E-11 |
| Putamen          | PPIA   | Female | Young | 0.824831 | 8.42E-05 | 0.000304 |
| Putamen          | PPIA   | Male   | Young | 0.880593 | 1.50E-14 | 1.28E-12 |
| Amygdala         | PPIA   | Female | Aged  | 0.952047 | 1.21E-09 | 1.55E-08 |
| Amygdala         | PPIA   | Male   | Aged  | 0.951477 | 2.91E-13 | 1.24E-11 |
| Amygdala         | PPIA   | Female | Young | 0.907837 | 1.80E-05 | 8.07E-05 |
| Amygdala         | PPIA   | Male   | Young | 0.839258 | 3.66E-09 | 4.33E-08 |
| Cortex           | PPP5C  | Female | Aged  | 0.624051 | 0.000176 | 0.000608 |
| Cortex           | PPP5C  | Male   | Aged  | 0.809278 | 6.62E-13 | 2.12E-11 |
| Cortex           | PPP5C  | Female | Young | 0.934116 | 2.12E-10 | 3.38E-09 |
| Cortex           | PPP5C  | Male   | Young | 0.775397 | 8.32E-15 | 1.07E-12 |
| Substantia nigra | PPP5C  | Female | Aged  | 0.718664 | 0.005645 | 0.013597 |
| Substantia nigra | PPP5C  | Male   | Aged  | 0.784701 | 1.26E-06 | 8.09E-06 |
| Substantia nigra | PPP5C  | Female | Young | 0.958712 | 6.54E-08 | 5.77E-07 |
| Substantia nigra | PPP5C  | Male   | Young | 0.875666 | 4.46E-08 | 4.23E-07 |
| Putamen          | PPP5C  | Female | Aged  | 0.864015 | 1.60E-05 | 7.43E-05 |
| Putamen          | PPP5C  | Male   | Aged  | 0.795529 | 6.72E-09 | 7.48E-08 |

|                  |        |        |       |          |          |          |
|------------------|--------|--------|-------|----------|----------|----------|
| Putamen          | PPP5C  | Female | Young | 0.757507 | 0.000677 | 0.002038 |
| Putamen          | PPP5C  | Male   | Young | 0.856007 | 5.02E-13 | 1.83E-11 |
| Amygdala         | PPP5C  | Female | Aged  | 0.846837 | 9.31E-06 | 4.58E-05 |
| Amygdala         | PPP5C  | Male   | Aged  | 0.78742  | 3.00E-06 | 1.71E-05 |
| Amygdala         | PPP5C  | Female | Young | 0.718279 | 0.005683 | 0.013597 |
| Amygdala         | PPP5C  | Male   | Young | 0.784015 | 1.81E-07 | 1.42E-06 |
| Cortex           | PTGES3 | Female | Aged  | -0.06213 | 0.739849 | 0.841784 |
| Cortex           | PTGES3 | Male   | Aged  | 0.448874 | 0.000954 | 0.002713 |
| Cortex           | PTGES3 | Female | Young | 0.311356 | 0.158395 | 0.264954 |
| Cortex           | PTGES3 | Male   | Young | 0.259907 | 0.032319 | 0.063643 |
| Substantia nigra | PTGES3 | Female | Aged  | 0.233774 | 0.442071 | 0.564481 |
| Substantia nigra | PTGES3 | Male   | Aged  | 0.496361 | 0.008453 | 0.019496 |
| Substantia nigra | PTGES3 | Female | Young | 0.397422 | 0.159386 | 0.264954 |
| Substantia nigra | PTGES3 | Male   | Young | 0.339464 | 0.113035 | 0.203782 |
| Putamen          | PTGES3 | Female | Aged  | 0.863032 | 1.68E-05 | 7.66E-05 |
| Putamen          | PTGES3 | Male   | Aged  | 0.388243 | 0.019291 | 0.040813 |
| Putamen          | PTGES3 | Female | Young | 0.527516 | 0.035731 | 0.069297 |
| Putamen          | PTGES3 | Male   | Young | 0.749942 | 1.09E-08 | 1.12E-07 |
| Amygdala         | PTGES3 | Female | Aged  | 0.587467 | 0.01036  | 0.023679 |
| Amygdala         | PTGES3 | Male   | Aged  | 0.621652 | 0.000909 | 0.002615 |
| Amygdala         | PTGES3 | Female | Young | 0.273182 | 0.366485 | 0.503544 |
| Amygdala         | PTGES3 | Male   | Young | 0.485934 | 0.005581 | 0.013597 |
| Cortex           | SGTA   | Female | Aged  | 0.580962 | 0.00061  | 0.00186  |
| Cortex           | SGTA   | Male   | Aged  | 0.715153 | 3.72E-09 | 4.33E-08 |
| Cortex           | SGTA   | Female | Young | 0.592355 | 0.003676 | 0.009317 |
| Cortex           | SGTA   | Male   | Young | 0.582961 | 1.83E-07 | 1.42E-06 |
| Substantia nigra | SGTA   | Female | Aged  | 0.646908 | 0.01686  | 0.03627  |
| Substantia nigra | SGTA   | Male   | Aged  | 0.563    | 0.002233 | 0.005881 |
| Substantia nigra | SGTA   | Female | Young | 0.194634 | 0.504914 | 0.624434 |
| Substantia nigra | SGTA   | Male   | Young | 0.289726 | 0.179933 | 0.284835 |
| Putamen          | SGTA   | Female | Aged  | 0.802981 | 0.00018  | 0.000615 |
| Putamen          | SGTA   | Male   | Aged  | 0.544475 | 0.000597 | 0.001841 |
| Putamen          | SGTA   | Female | Young | 0.389439 | 0.135962 | 0.235177 |
| Putamen          | SGTA   | Male   | Young | 0.711419 | 1.29E-07 | 1.07E-06 |
| Amygdala         | SGTA   | Female | Aged  | 0.757964 | 0.000268 | 0.000891 |
| Amygdala         | SGTA   | Male   | Aged  | 0.675519 | 0.000211 | 0.000711 |
| Amygdala         | SGTA   | Female | Young | 0.618898 | 0.024116 | 0.048612 |
| Amygdala         | SGTA   | Male   | Young | 0.674386 | 3.18E-05 | 0.000131 |
| Cortex           | STIP1  | Female | Aged  | 0.591881 | 0.000453 | 0.001431 |
| Cortex           | STIP1  | Male   | Aged  | 0.480954 | 0.000354 | 0.00116  |
| Cortex           | STIP1  | Female | Young | 0.330854 | 0.132585 | 0.232478 |
| Cortex           | STIP1  | Male   | Young | 0.459237 | 8.18E-05 | 0.000299 |
| Substantia nigra | STIP1  | Female | Aged  | 0.034783 | 0.910183 | 0.962048 |
| Substantia nigra | STIP1  | Male   | Aged  | 0.520221 | 0.005409 | 0.013315 |
| Substantia nigra | STIP1  | Female | Young | 0.64924  | 0.011988 | 0.026229 |
| Substantia nigra | STIP1  | Male   | Young | 0.449911 | 0.031234 | 0.061984 |
| Putamen          | STIP1  | Female | Aged  | 0.819104 | 0.000104 | 0.000367 |

|                  |       |        |       |          |          |          |
|------------------|-------|--------|-------|----------|----------|----------|
| Putamen          | STIP1 | Male   | Aged  | 0.258438 | 0.128036 | 0.227334 |
| Putamen          | STIP1 | Female | Young | 0.36536  | 0.164055 | 0.269511 |
| Putamen          | STIP1 | Male   | Young | 0.636096 | 5.98E-06 | 3.19E-05 |
| Amygdala         | STIP1 | Female | Aged  | 0.228259 | 0.362291 | 0.503544 |
| Amygdala         | STIP1 | Male   | Aged  | 0.361055 | 0.076192 | 0.138335 |
| Amygdala         | STIP1 | Female | Young | -0.06434 | 0.834596 | 0.916351 |
| Amygdala         | STIP1 | Male   | Young | 0.278835 | 0.128764 | 0.227334 |
| Cortex           | STUB1 | Female | Aged  | 0.856309 | 8.08E-10 | 1.09E-08 |
| Cortex           | STUB1 | Male   | Aged  | 0.833872 | 3.04E-14 | 1.56E-12 |
| Cortex           | STUB1 | Female | Young | 0.815564 | 3.75E-06 | 2.09E-05 |
| Cortex           | STUB1 | Male   | Young | 0.794963 | 5.77E-16 | 1.48E-13 |
| Substantia nigra | STUB1 | Female | Aged  | 0.763179 | 0.002405 | 0.006219 |
| Substantia nigra | STUB1 | Male   | Aged  | 0.731734 | 1.44E-05 | 6.97E-05 |
| Substantia nigra | STUB1 | Female | Young | 0.748109 | 0.00209  | 0.005631 |
| Substantia nigra | STUB1 | Male   | Young | 0.794878 | 5.87E-06 | 3.19E-05 |
| Putamen          | STUB1 | Female | Aged  | 0.95364  | 1.09E-08 | 1.12E-07 |
| Putamen          | STUB1 | Male   | Aged  | 0.849736 | 5.58E-11 | 1.02E-09 |
| Putamen          | STUB1 | Female | Young | 0.559185 | 0.024325 | 0.048649 |
| Putamen          | STUB1 | Male   | Young | 0.849129 | 1.19E-12 | 3.05E-11 |
| Amygdala         | STUB1 | Female | Aged  | 0.800311 | 6.65E-05 | 0.000254 |
| Amygdala         | STUB1 | Male   | Aged  | 0.800603 | 1.54E-06 | 8.97E-06 |
| Amygdala         | STUB1 | Female | Young | 0.733472 | 0.004327 | 0.010787 |
| Amygdala         | STUB1 | Male   | Young | 0.748305 | 1.30E-06 | 8.10E-06 |

**Supplementary Table 5: Volumetric statistical results for each structure in the modified AllenBrain Atlas in terms of standardised betas, t-, p- and q-values for each of the comparisons performed (M83+/:ST11WT versus WT mice, and M83+/:ΔHET versus M83+/:ST11WT).**

| region                                      | M83+/:ST11WT versus WT mice |                |                      |                      |
|---------------------------------------------|-----------------------------|----------------|----------------------|----------------------|
|                                             | beta- M83+/:                | tvalue- M83+/: | pvalue-tvalue M83+/: | qvalue-tvalue M83+/: |
| anterior commissure                         | -0.15863                    | -6.38202       | 0.00000              | 0.00133              |
| arbor vitae                                 | -0.97405                    | -5.40741       | 0.00000              | 0.00184              |
| central canal, spinal cord/medulla          | NA                          | NA             | NA                   | NA                   |
| Central linear nucleus raphe                | -0.00795                    | -3.12174       | 0.00000              | 0.03055              |
| cerebellar commissure                       | -0.00524                    | -2.12684       | 0.00000              | 0.12332              |
| cerebral aqueduct                           | -0.04047                    | -1.55645       | 0.00000              | 0.26042              |
| corpus callosum                             | -0.50716                    | -3.36455       | 0.00000              | 0.02158              |
| Declive (VI)                                | -0.14888                    | -1.16761       | 0.00000              | 0.40275              |
| doral tegmental decussation                 | -0.00033                    | -0.76106       | 0.00000              | 0.59903              |
| dorsal fornix                               | 0.00126                     | 1.13445        | 0.00000              | 0.41606              |
| dorsal hippocampal commissure               | -0.12347                    | -3.82128       | 0.00000              | 0.01069              |
| Edinger-Westphal nucleus                    | -0.00234                    | -1.28292       | 0.00000              | 0.35071              |
| fiber tracts                                | -0.07455                    | -2.69079       | 0.00000              | 0.05524              |
| Folium-tuber vermis (VII)                   | -0.14495                    | -2.38983       | 0.00000              | 0.08684              |
| fourth ventricle                            | -0.00083                    | -0.06839       | 0.00009              | 0.96250              |
| habenular commissure                        | -0.00092                    | -0.60376       | 0.00000              | 0.67459              |
| Hypoglossal nucleus                         | -0.02500                    | -2.76105       | 0.00000              | 0.05022              |
| Induseum griseum                            | -0.00060                    | -0.13746       | 0.00001              | 0.92556              |
| inferior colliculus commissure              | 0.00041                     | 0.36617        | 0.00000              | 0.80077              |
| Interanteromedial nucleus of the thalamus   | -0.00551                    | -3.42544       | 0.00000              | 0.01937              |
| Interfascicular nucleus raphe               | -0.00696                    | -2.56334       | 0.00000              | 0.06771              |
| Intermediodorsal nucleus of the thalamus    | 0.00238                     | 0.54391        | 0.00000              | 0.70069              |
| Interpeduncular nucleus                     | -0.02318                    | -1.95888       | 0.00000              | 0.15428              |
| left Abducens nucleus                       | 0.00045                     | 0.96152        | 0.00000              | 0.50136              |
| left Accessory facial motor nucleus         | -0.00009                    | -0.34549       | 0.00000              | 0.81186              |
| left Accessory olfactory bulb               | -0.01824                    | -2.01386       | 0.00000              | 0.14393              |
| left Accessory supraoptic group             | NA                          | NA             | NA                   | NA                   |
| left Accessory trigeminal nucleus           | -0.00093                    | -2.19667       | 0.00000              | 0.11109              |
| left Agranular insular area, dorsal part    | -0.11798                    | -3.11351       | 0.00000              | 0.03055              |
| left Agranular insular area, posterior part | -0.02346                    | -1.52424       | 0.00000              | 0.27032              |
| left Agranular insular area, ventral part   | -0.09114                    | -4.50446       | 0.00000              | 0.00469              |
| left alveus                                 | -0.05529                    | -4.24292       | 0.00000              | 0.00579              |
| left amygdalar capsule                      | -0.00154                    | -0.73649       | 0.00000              | 0.61181              |

|                                                    |          |          |         |         |
|----------------------------------------------------|----------|----------|---------|---------|
| left Anterior amygdalar area                       | -0.00901 | -1.47499 | 0.00000 | 0.29113 |
| left Anterior area                                 | -0.04401 | -2.28994 | 0.00000 | 0.09885 |
| left Anterior cingulate area                       | 0.00604  | 0.19212  | 0.00000 | 0.89744 |
| left Anterior cingulate area, ventral part         | 0.01409  | 0.60490  | 0.00000 | 0.67459 |
| left Anterior hypothalamic nucleus                 | -0.00316 | -0.40682 | 0.00000 | 0.78141 |
| left Anterior olfactory nucleus                    | -0.22903 | -6.16068 | 0.00000 | 0.00136 |
| left Anterior pretectal nucleus                    | -0.06162 | -5.46552 | 0.00000 | 0.00184 |
| left Anterior tegmental nucleus                    | -0.00062 | -0.95282 | 0.00000 | 0.50500 |
| left Anterodorsal nucleus                          | -0.00277 | -1.02872 | 0.00000 | 0.46789 |
| left Anterodorsal preoptic nucleus                 | -0.00297 | -2.96108 | 0.00000 | 0.03774 |
| left Anterolateral visual area                     | -0.02115 | -1.87053 | 0.00000 | 0.17434 |
| left Anteromedial nucleus, dorsal part             | -0.00959 | -2.05379 | 0.00000 | 0.13522 |
| left Anteromedial nucleus, ventral part            | -0.00472 | -1.61730 | 0.00000 | 0.24533 |
| left Anteromedial visual area                      | -0.01480 | -1.45737 | 0.00000 | 0.29561 |
| left Anteroventral nucleus of thalamus             | -0.00732 | -1.10536 | 0.00000 | 0.43010 |
| left Anteroventral periventricular nucleus         | -0.00174 | -0.86269 | 0.00000 | 0.55276 |
| left Anteroventral preoptic nucleus                | 0.00093  | 0.70673  | 0.00000 | 0.62438 |
| left Arcuate hypothalamic nucleus                  | 0.00349  | 0.86052  | 0.00000 | 0.55338 |
| left Area postrema                                 | 0.00039  | 0.20874  | 0.00000 | 0.88876 |
| left Area prostriata                               | -0.01278 | -3.34619 | 0.00000 | 0.02212 |
| left auditory radiation                            | -0.00654 | -1.19983 | 0.00000 | 0.38412 |
| left Barrington's nucleus                          | 0.00031  | 0.90252  | 0.00000 | 0.52988 |
| left Basolateral amygdalar nucleus, anterior part  | -0.02315 | -3.11786 | 0.00000 | 0.03055 |
| left Basolateral amygdalar nucleus, posterior part | -0.02657 | -3.36997 | 0.00000 | 0.02150 |
| left Basolateral amygdalar nucleus, ventral part   | -0.00790 | -2.23503 | 0.00000 | 0.10665 |
| left Basomedial amygdalar nucleus, anterior part   | -0.01435 | -1.75270 | 0.00000 | 0.20650 |
| left Basomedial amygdalar nucleus, posterior part  | -0.02275 | -4.27866 | 0.00000 | 0.00571 |
| left Bed nuclei of the stria terminalis            | -0.04893 | -4.02728 | 0.00000 | 0.00821 |
| left Bed nucleus of the accessory olfactory tract  | -0.00069 | -1.31631 | 0.00000 | 0.34117 |
| left Bed nucleus of the anterior commissure        | -0.00059 | -1.98206 | 0.00000 | 0.14896 |
| left brachium of the inferior colliculus           | -0.01529 | -4.29259 | 0.00000 | 0.00571 |
| left brachium of the superior colliculus           | -0.01490 | -5.22194 | 0.00000 | 0.00211 |
| left Caudoputamen                                  | -0.59126 | -2.58621 | 0.00000 | 0.06512 |
| left Central amygdalar nucleus                     | -0.04639 | -4.26803 | 0.00000 | 0.00571 |
| left Central lateral nucleus of the thalamus       | -0.01532 | -2.67348 | 0.00000 | 0.05676 |
| left Central medial nucleus of the thalamus        | -0.00404 | -1.41530 | 0.00000 | 0.30927 |
| left cerebral peduncle                             | -0.02030 | -1.86079 | 0.00000 | 0.17624 |
| left choroid plexus                                | -0.01715 | -1.08622 | 0.00000 | 0.43820 |
| left cingulum bundle                               | -0.03650 | -3.65632 | 0.00000 | 0.01432 |
| left Claustrum                                     | -0.01441 | -3.68316 | 0.00000 | 0.01377 |

|                                                            |          |          |         |         |
|------------------------------------------------------------|----------|----------|---------|---------|
| left columns of the fornix                                 | -0.01343 | -3.93402 | 0.00000 | 0.00912 |
| left commissural branch of stria terminalis                | -0.00022 | -0.50795 | 0.00000 | 0.72185 |
| left Copula pyramidis                                      | -0.17806 | -3.87339 | 0.00000 | 0.00996 |
| left Cortical amygdalar area, anterior part                | -0.00813 | -0.89764 | 0.00000 | 0.53013 |
| left Cortical amygdalar area, posterior part, lateral zone | -0.03125 | -2.41180 | 0.00000 | 0.08368 |
| left Cortical amygdalar area, posterior part, medial zone  | -0.04011 | -3.55075 | 0.00000 | 0.01652 |
| left Cortical subplate                                     | -0.00822 | -3.54028 | 0.00000 | 0.01652 |
| left corticospinal tract                                   | -0.00577 | -3.51535 | 0.00000 | 0.01682 |
| left crossed tectospinal pathway                           | -0.01601 | -2.81941 | 0.00000 | 0.04671 |
| left Crus 1                                                | -0.22588 | -2.41838 | 0.00000 | 0.08324 |
| left Crus 2                                                | -0.13511 | -1.92628 | 0.00000 | 0.16119 |
| left cuneate fascicle                                      | -0.00032 | -0.52314 | 0.00000 | 0.71295 |
| left Cuneate nucleus                                       | 0.00102  | 0.12872  | 0.00001 | 0.92797 |
| left Cuneiform nucleus                                     | -0.01881 | -2.54121 | 0.00000 | 0.07060 |
| left Dentate gyrus                                         | -0.28401 | -3.98325 | 0.00000 | 0.00870 |
| left Dentate nucleus                                       | -0.01449 | -3.64018 | 0.00000 | 0.01462 |
| left Diagonal band nucleus                                 | -0.00591 | -0.73615 | 0.00000 | 0.61181 |
| left dorsal acoustic stria                                 | 0.00020  | 0.36754  | 0.00000 | 0.80077 |
| left Dorsal auditory area                                  | -0.03425 | -2.34515 | 0.00000 | 0.09253 |
| left Dorsal cochlear nucleus                               | 0.00294  | 0.27547  | 0.00000 | 0.85607 |
| left dorsal limb                                           | -0.00648 | -1.20558 | 0.00000 | 0.38228 |
| left Dorsal motor nucleus of the vagus nerve               | -0.00403 | -1.35465 | 0.00000 | 0.33094 |
| left Dorsal nucleus raphe                                  | -0.00164 | -0.85424 | 0.00000 | 0.55493 |
| left Dorsal part of the lateral geniculate complex         | -0.04061 | -4.51871 | 0.00000 | 0.00466 |
| left Dorsal peduncular area                                | -0.02958 | -3.74094 | 0.00000 | 0.01240 |
| left Dorsal premammillary nucleus                          | -0.00174 | -0.84583 | 0.00000 | 0.55930 |
| left dorsal spinocerebellar tract                          | -0.00069 | -0.56586 | 0.00000 | 0.69497 |
| left Dorsal tegmental nucleus                              | 0.00087  | 0.56277  | 0.00000 | 0.69497 |
| left Dorsal terminal nucleus of the accessory optic tract  | -0.00094 | -3.10746 | 0.00000 | 0.03056 |
| left Dorsomedial nucleus of the hypothalamus               | -0.01462 | -3.58503 | 0.00000 | 0.01594 |
| left Ectorhinal area                                       | -0.04619 | -2.78662 | 0.00000 | 0.04923 |
| left Endopiriform nucleus, dorsal part                     | -0.05981 | -4.26802 | 0.00000 | 0.00571 |
| left Endopiriform nucleus, ventral part                    | -0.02239 | -3.03041 | 0.00000 | 0.03394 |
| left Entorhinal area, lateral part                         | -0.22773 | -4.74324 | 0.00000 | 0.00331 |
| left Entorhinal area, medial part, dorsal zone             | -0.11865 | -2.18693 | 0.00000 | 0.11227 |
| left Ethmoid nucleus of the thalamus                       | -0.00816 | -3.04220 | 0.00000 | 0.03328 |
| left external capsule                                      | -0.01683 | -3.08771 | 0.00000 | 0.03129 |
| left External cuneate nucleus                              | 0.00309  | 0.88791  | 0.00000 | 0.53622 |
| left external medullary lamina of the thalamus             | -0.00134 | -1.05370 | 0.00000 | 0.45775 |
| left Facial motor nucleus                                  | 0.00370  | 0.31928  | 0.00000 | 0.82862 |

|                                                                |          |          |         |         |
|----------------------------------------------------------------|----------|----------|---------|---------|
| left facial nerve                                              | -0.00117 | -0.93791 | 0.00000 | 0.51226 |
| left fasciculus retroflexus                                    | -0.00503 | -2.88379 | 0.00000 | 0.04271 |
| left Fasciola cinerea                                          | -0.00214 | -1.41588 | 0.00000 | 0.30927 |
| left Fastigial nucleus                                         | -0.04378 | -5.89021 | 0.00000 | 0.00155 |
| left Field CA1                                                 | -0.28432 | -2.83683 | 0.00000 | 0.04589 |
| left Field CA2                                                 | -0.02221 | -4.29722 | 0.00000 | 0.00571 |
| left Field CA3                                                 | -0.26682 | -4.24437 | 0.00000 | 0.00579 |
| left Fields of Forel                                           | -0.00579 | -2.11645 | 0.00000 | 0.12513 |
| left fimbria                                                   | -0.01075 | -0.65751 | 0.00000 | 0.65256 |
| left Flocculus                                                 | -0.02899 | -1.55321 | 0.00000 | 0.26096 |
| left Frontal pole                                              | 0.00932  | 1.12924  | 0.00000 | 0.41749 |
| left Fundus of striatum                                        | -0.00310 | -0.47755 | 0.00000 | 0.73962 |
| left Gigantocellular reticular nucleus                         | -0.03766 | -1.31381 | 0.00000 | 0.34117 |
| left Globus pallidus, external segment                         | -0.04384 | -2.71436 | 0.00000 | 0.05458 |
| left Globus pallidus, internal segment                         | -0.00923 | -1.76786 | 0.00000 | 0.20255 |
| left Gracile nucleus                                           | -0.00135 | -0.81305 | 0.00000 | 0.57081 |
| left Gustatory areas                                           | -0.02719 | -1.95911 | 0.00000 | 0.15428 |
| left Hippocampal formation                                     | -0.01282 | -3.23963 | 0.00000 | 0.02553 |
| left Hippocampo-amygdalar transition area                      | -0.01160 | -2.44769 | 0.00000 | 0.07998 |
| left inferior cerebellar peduncle                              | -0.02660 | -2.96718 | 0.00000 | 0.03756 |
| left Inferior colliculus                                       | -0.15233 | -2.86048 | 0.00000 | 0.04441 |
| left Inferior olivary complex                                  | -0.00819 | -0.83369 | 0.00000 | 0.56428 |
| left Inferior salivatory nucleus                               | -0.00012 | -0.28302 | 0.00000 | 0.85123 |
| left Infracerebellar nucleus                                   | -0.00605 | -4.27055 | 0.00000 | 0.00571 |
| left Infralimbic area                                          | -0.02650 | -2.76847 | 0.00000 | 0.05017 |
| left Interanterodorsal nucleus of the thalamus                 | -0.00375 | -2.41256 | 0.00000 | 0.08368 |
| left Intercalated amygdalar nucleus                            | -0.00493 | -2.19654 | 0.00000 | 0.11109 |
| left Intergeniculate leaflet of the lateral geniculate complex | -0.00139 | -1.14398 | 0.00000 | 0.41325 |
| left Intermediate geniculate nucleus                           | -0.00099 | -2.14542 | 0.00000 | 0.11982 |
| left Intermediate reticular nucleus                            | -0.02403 | -0.68594 | 0.00000 | 0.63638 |
| left internal capsule                                          | -0.06930 | -2.58338 | 0.00000 | 0.06522 |
| left Interposed nucleus                                        | -0.05654 | -5.33142 | 0.00000 | 0.00184 |
| left Interstitial nucleus of Cajal                             | -0.00181 | -2.05335 | 0.00000 | 0.13522 |
| left Intertrigeminal nucleus                                   | -0.00038 | -0.41738 | 0.00000 | 0.77852 |
| left Koelliker-Fuse subnucleus                                 | -0.00831 | -3.32786 | 0.00000 | 0.02232 |
| left Lateral amygdalar nucleus                                 | -0.00737 | -0.51557 | 0.00000 | 0.71792 |
| left Lateral dorsal nucleus of thalamus                        | -0.02667 | -1.89585 | 0.00000 | 0.16872 |
| left Lateral habenula                                          | -0.00775 | -1.31031 | 0.00000 | 0.34161 |
| left Lateral hypothalamic area                                 | -0.06340 | -2.61865 | 0.00000 | 0.06171 |
| left lateral lemniscus                                         | -0.01808 | -2.22904 | 0.00000 | 0.10718 |



|                                                            |          |          |         |         |
|------------------------------------------------------------|----------|----------|---------|---------|
| left Lateral mammillary nucleus                            | 0.00172  | 0.62959  | 0.00000 | 0.66375 |
| left lateral olfactory tract, body                         | -0.01369 | -1.13418 | 0.00000 | 0.41606 |
| left Lateral posterior nucleus of the thalamus             | -0.07660 | -4.90274 | 0.00000 | 0.00303 |
| left Lateral preoptic area                                 | -0.01183 | -1.76437 | 0.00000 | 0.20328 |
| left lateral recess                                        | -0.01259 | -2.03503 | 0.00000 | 0.13922 |
| left Lateral reticular nucleus, magnocellular part         | -0.00599 | -0.98680 | 0.00000 | 0.49056 |
| left Lateral reticular nucleus, parvicellular part         | -0.00111 | -1.67104 | 0.00000 | 0.23092 |
| left Lateral septal nucleus, caudal (caudodorsal) part     | -0.00916 | -1.26604 | 0.00000 | 0.35657 |
| left Lateral septal nucleus, rostral (rostroventral) part  | -0.00570 | -0.21542 | 0.00000 | 0.88876 |
| left Lateral septal nucleus, ventral part                  | -0.00635 | -0.73912 | 0.00000 | 0.61177 |
| left Lateral terminal nucleus of the accessory optic tract | -0.00054 | -1.50474 | 0.00000 | 0.27813 |
| left lateral ventricle                                     | -0.00228 | -0.08408 | 0.00004 | 0.95504 |
| left Lateral vestibular nucleus                            | -0.00317 | -0.98119 | 0.00000 | 0.49353 |
| left Lateral visual area                                   | -0.01518 | -0.80121 | 0.00000 | 0.57670 |
| left Laterodorsal tegmental nucleus                        | -0.00105 | -0.50503 | 0.00000 | 0.72310 |
| left Laterointermediate area                               | -0.00289 | -0.38582 | 0.00000 | 0.79398 |
| left Linear nucleus of the medulla                         | -0.00093 | -0.87035 | 0.00000 | 0.54809 |
| left Lingula (I)                                           | 0.00024  | 0.09572  | 0.00003 | 0.94696 |
| left Locus ceruleus                                        | 0.00000  | -0.00001 | 0.01613 | 0.99999 |
| left Magnocellular nucleus                                 | -0.00695 | -1.08971 | 0.00000 | 0.43760 |
| left Magnocellular reticular nucleus                       | -0.01701 | -2.29796 | 0.00000 | 0.09799 |
| left Main olfactory bulb                                   | -1.31020 | -6.72477 | 0.00000 | 0.00133 |
| left mammillary peduncle                                   | -0.00056 | -0.73410 | 0.00000 | 0.61181 |
| left mammillotegmental tract                               | -0.00326 | -2.21428 | 0.00000 | 0.10857 |
| left mammillothalamic tract                                | -0.00436 | -2.52572 | 0.00000 | 0.07227 |
| left Medial accesory oculomotor nucleus                    | -0.00041 | -0.39381 | 0.00000 | 0.78938 |
| left Medial amygdalar nucleus                              | -0.06169 | -4.23150 | 0.00000 | 0.00585 |
| left medial corticohypothalamic tract                      | -0.00006 | -0.19088 | 0.00000 | 0.89744 |
| left medial forebrain bundle                               | -0.00130 | -1.54552 | 0.00000 | 0.26267 |
| left Medial geniculate complex, dorsal part                | -0.00601 | -3.33633 | 0.00000 | 0.02225 |
| left Medial geniculate complex, medial part                | -0.00325 | -1.03889 | 0.00000 | 0.46588 |
| left Medial geniculate complex, ventral part               | -0.00702 | -1.98960 | 0.00000 | 0.14773 |
| left Medial habenula                                       | -0.00930 | -1.43055 | 0.00000 | 0.30489 |
| left medial lemniscus                                      | -0.02755 | -4.45469 | 0.00000 | 0.00471 |
| left medial longitudinal fascicle                          | -0.00355 | -1.81122 | 0.00000 | 0.18969 |
| left Medial mammillary nucleus                             | -0.00625 | -0.60186 | 0.00000 | 0.67459 |
| left Medial preoptic area                                  | -0.00471 | -0.81993 | 0.00000 | 0.56825 |
| left Medial preoptic nucleus                               | -0.00515 | -1.64648 | 0.00000 | 0.23555 |
| left Medial pretectal area                                 | -0.00044 | -0.68849 | 0.00000 | 0.63544 |
| left Medial terminal nucleus of the accessory optic tract  | -0.00141 | -1.88487 | 0.00000 | 0.17071 |

|                                                         |          |          |         |         |
|---------------------------------------------------------|----------|----------|---------|---------|
| left Medial vestibular nucleus                          | 0.01405  | 0.69822  | 0.00000 | 0.62890 |
| left Mediodorsal nucleus of thalamus                    | -0.02477 | -1.85851 | 0.00000 | 0.17624 |
| left Medullary reticular nucleus, dorsal part           | -0.02235 | -1.33934 | 0.00000 | 0.33426 |
| left Medullary reticular nucleus, ventral part          | -0.03892 | -2.32691 | 0.00000 | 0.09418 |
| left Midbrain reticular nucleus                         | -0.18431 | -3.66275 | 0.00000 | 0.01426 |
| left Midbrain reticular nucleus, retrorubral area       | -0.00357 | -2.06127 | 0.00000 | 0.13445 |
| left Midbrain trigeminal nucleus                        | -0.00002 | -0.05898 | 0.00012 | 0.96691 |
| left middle cerebellar peduncle                         | -0.02090 | -1.92060 | 0.00000 | 0.16245 |
| left Motor nucleus of trigeminal                        | -0.00821 | -1.49117 | 0.00000 | 0.28394 |
| left motor root of the trigeminal nerve                 | 0.00033  | 0.35036  | 0.00000 | 0.81021 |
| left nigrostriatal tract                                | -0.00436 | -3.42445 | 0.00000 | 0.01937 |
| left Nucleus accumbens                                  | -0.18700 | -4.26731 | 0.00000 | 0.00571 |
| left Nucleus ambiguus, dorsal division                  | -0.00014 | -0.20412 | 0.00000 | 0.89034 |
| left Nucleus ambiguus, ventral division                 | -0.00087 | -1.01310 | 0.00000 | 0.47613 |
| left Nucleus incertus                                   | 0.00015  | 0.12426  | 0.00001 | 0.93031 |
| left Nucleus of Darkschewitsch                          | -0.00275 | -1.58720 | 0.00000 | 0.25158 |
| left Nucleus of reuniens                                | -0.02260 | -3.82196 | 0.00000 | 0.01069 |
| left Nucleus of Roller                                  | -0.00151 | -2.16829 | 0.00000 | 0.11536 |
| left Nucleus of the brachium of the inferior colliculus | -0.00226 | -1.66899 | 0.00000 | 0.23115 |
| left Nucleus of the lateral lemniscus                   | -0.01435 | -1.66312 | 0.00000 | 0.23234 |
| left Nucleus of the lateral olfactory tract             | -0.00365 | -0.93038 | 0.00000 | 0.51523 |
| left Nucleus of the optic tract                         | -0.01198 | -4.72997 | 0.00000 | 0.00331 |
| left Nucleus of the posterior commissure                | -0.00683 | -2.33562 | 0.00000 | 0.09361 |
| left Nucleus of the solitary tract                      | -0.00034 | -0.03715 | 0.00056 | 0.97969 |
| left Nucleus of the trapezoid body                      | -0.00343 | -2.02556 | 0.00000 | 0.14134 |
| left Nucleus prepositus                                 | 0.00111  | 0.43909  | 0.00000 | 0.76649 |
| left Nucleus sagulum                                    | -0.00322 | -4.10131 | 0.00000 | 0.00716 |
| left Nucleus x                                          | -0.00106 | -1.59511 | 0.00000 | 0.25040 |
| left Nucleus y                                          | -0.00051 | -1.21890 | 0.00000 | 0.37525 |
| left oculomotor nerve                                   | -0.00020 | -1.04795 | 0.00000 | 0.46070 |
| left Oculomotor nucleus                                 | -0.00074 | -1.35440 | 0.00000 | 0.33094 |
| left olfactory nerve layer of main olfactory bulb       | -0.10137 | -2.76397 | 0.00000 | 0.05017 |
| left Olfactory tubercle                                 | -0.06811 | -1.32403 | 0.00000 | 0.33927 |
| left Olivary pretectal nucleus                          | -0.00317 | -3.76110 | 0.00000 | 0.01209 |
| left optic nerve                                        | -0.00210 | -1.38936 | 0.00000 | 0.31969 |
| left optic radiation                                    | -0.07086 | -3.00118 | 0.00000 | 0.03573 |
| left optic tract                                        | -0.01509 | -1.38596 | 0.00000 | 0.32006 |
| left Orbital area, lateral part                         | -0.06434 | -2.74810 | 0.00000 | 0.05137 |
| left Orbital area, medial part                          | -0.06314 | -4.89182 | 0.00000 | 0.00303 |
| left Orbital area, ventrolateral part                   | -0.06399 | -3.62709 | 0.00000 | 0.01482 |

|                                                          |          |          |         |         |
|----------------------------------------------------------|----------|----------|---------|---------|
| left Parabigeminal nucleus                               | -0.00077 | -0.93548 | 0.00000 | 0.51255 |
| left Parabrachial nucleus                                | -0.03842 | -3.24801 | 0.00000 | 0.02539 |
| left Paracentral nucleus                                 | -0.00756 | -1.87066 | 0.00000 | 0.17434 |
| left Parafascicular nucleus                              | -0.01156 | -1.47326 | 0.00000 | 0.29129 |
| left Paraflocculus                                       | -0.15250 | -2.53654 | 0.00000 | 0.07097 |
| left Paragigantocellular reticular nucleus, dorsal part  | 0.00243  | 0.65021  | 0.00000 | 0.65493 |
| left Paragigantocellular reticular nucleus, lateral part | 0.00057  | 0.05806  | 0.00015 | 0.96691 |
| left Paramedian lobule                                   | -0.27669 | -3.53541 | 0.00000 | 0.01652 |
| left Paranigral nucleus                                  | -0.00141 | -1.99093 | 0.00000 | 0.14773 |
| left Parapyramidal nucleus                               | -0.00132 | -0.85480 | 0.00000 | 0.55493 |
| left Parasolitary nucleus                                | 0.00021  | 0.24933  | 0.00000 | 0.87045 |
| left Parastrial nucleus                                  | -0.00065 | -0.67867 | 0.00000 | 0.64102 |
| left Parasubiculum                                       | -0.04198 | -3.94014 | 0.00000 | 0.00911 |
| left Parasubthalamic nucleus                             | -0.00315 | -1.45855 | 0.00000 | 0.29561 |
| left Parataenial nucleus                                 | -0.00561 | -1.89423 | 0.00000 | 0.16872 |
| left Paratrigeminal nucleus                              | 0.00075  | 0.37336  | 0.00000 | 0.79816 |
| left Paratrochlear nucleus                               | -0.00038 | -0.78747 | 0.00000 | 0.58338 |
| left Paraventricular hypothalamic nucleus                | -0.02314 | -4.45664 | 0.00000 | 0.00471 |
| left Paraventricular nucleus of the thalamus             | -0.00666 | -0.97530 | 0.00000 | 0.49671 |
| left Parvicellular motor 5 nucleus                       | 0.00030  | 0.18605  | 0.00000 | 0.89890 |
| left Parvicellular reticular nucleus                     | -0.02873 | -1.22966 | 0.00000 | 0.37130 |
| left Pedunculopontine nucleus                            | -0.03600 | -3.90213 | 0.00000 | 0.00953 |
| left Perifornical nucleus                                | -0.00755 | -2.91366 | 0.00000 | 0.04096 |
| left Peripeduncular nucleus                              | -0.00241 | -4.19801 | 0.00000 | 0.00594 |
| left Perireunensis nucleus                               | -0.00909 | -4.78608 | 0.00000 | 0.00324 |
| left Perirhinal area                                     | -0.02679 | -3.55410 | 0.00000 | 0.01652 |
| left Peritrigeminal zone                                 | -0.01040 | -2.71252 | 0.00000 | 0.05458 |
| left Periventricular hypothalamic nucleus                | -0.02004 | -2.69974 | 0.00000 | 0.05514 |
| left Piriform area                                       | -0.32564 | -2.96713 | 0.00000 | 0.03756 |
| left Piriform-amygdalar area                             | -0.01223 | -0.76667 | 0.00000 | 0.59678 |
| left Pontine central gray                                | 0.00117  | 0.21018  | 0.00000 | 0.88876 |
| left Pontine gray                                        | -0.04674 | -3.31126 | 0.00000 | 0.02297 |
| left Pontine reticular nucleus                           | -0.05546 | -2.23391 | 0.00000 | 0.10665 |
| left Pontine reticular nucleus, caudal part              | -0.04103 | -1.70298 | 0.00000 | 0.21984 |
| left Posterior amygdalar nucleus                         | -0.03609 | -4.41013 | 0.00000 | 0.00500 |
| left Posterior auditory area                             | -0.00950 | -1.16073 | 0.00000 | 0.40532 |
| left Posterior complex of the thalamus                   | -0.01143 | -0.61947 | 0.00000 | 0.67071 |
| left Posterior hypothalamic nucleus                      | -0.03543 | -3.22899 | 0.00000 | 0.02584 |
| left Posterior intralaminar thalamic nucleus             | -0.00533 | -2.16803 | 0.00000 | 0.11536 |
| left Posterior limiting nucleus of the thalamus          | -0.00635 | -3.51522 | 0.00000 | 0.01682 |

|                                                  |          |          |         |         |
|--------------------------------------------------|----------|----------|---------|---------|
| left Posterior pretectal nucleus                 | -0.00719 | -5.33161 | 0.00000 | 0.00184 |
| left Posterior triangular thalamic nucleus       | -0.00697 | -2.63446 | 0.00000 | 0.06020 |
| left Posterodorsal preoptic nucleus              | -0.00006 | -0.21653 | 0.00000 | 0.88876 |
| left Posterodorsal tegmental nucleus             | -0.00033 | -0.32502 | 0.00000 | 0.82509 |
| left Posterolateral visual area                  | 0.01295  | 1.33303  | 0.00000 | 0.33585 |
| left posteromedial visual area                   | -0.01763 | -1.03026 | 0.00000 | 0.46789 |
| left Postpiriform transition area                | -0.02443 | -1.55585 | 0.00000 | 0.26042 |
| left Postrhinal area                             | 0.01742  | 0.95814  | 0.00000 | 0.50219 |
| left Postsubiculum                               | -0.05051 | -4.48869 | 0.00000 | 0.00471 |
| left Precommissural nucleus                      | 0.00517  | 1.58917  | 0.00000 | 0.25135 |
| left Prelimbic area                              | -0.01344 | -0.65573 | 0.00000 | 0.65256 |
| left Preparasubthalamic nucleus                  | -0.00018 | -0.35823 | 0.00000 | 0.80610 |
| left Presubiculum                                | -0.03609 | -3.07256 | 0.00000 | 0.03193 |
| left Primary auditory area                       | -0.03426 | -1.52811 | 0.00000 | 0.26926 |
| left Primary motor area                          | 0.03392  | 0.39285  | 0.00000 | 0.78938 |
| left Primary somatosensory area, barrel field    | -0.12927 | -1.86236 | 0.00000 | 0.17624 |
| left Primary somatosensory area, lower limb      | -0.01088 | -0.61664 | 0.00000 | 0.67188 |
| left Primary somatosensory area, mouth           | -0.05557 | -1.10402 | 0.00000 | 0.43010 |
| left Primary somatosensory area, nose            | -0.04718 | -1.56050 | 0.00000 | 0.26022 |
| left Primary somatosensory area, trunk           | -0.02642 | -1.75639 | 0.00000 | 0.20568 |
| left Primary somatosensory area, unassigned      | -0.01336 | -1.03382 | 0.00000 | 0.46789 |
| left Primary somatosensory area, upper limb      | -0.01584 | -0.47666 | 0.00000 | 0.73962 |
| left Primary visual area                         | -0.13701 | -1.31505 | 0.00000 | 0.34117 |
| left principal mammillary tract                  | -0.00117 | -2.36904 | 0.00000 | 0.08953 |
| left Principal sensory nucleus of the trigeminal | -0.01459 | -0.94757 | 0.00000 | 0.50694 |
| left Prosubiculum                                | -0.01399 | -0.81782 | 0.00000 | 0.56825 |
| left pyramid                                     | -0.00066 | -0.13635 | 0.00001 | 0.92556 |
| left Red nucleus                                 | -0.02511 | -2.73630 | 0.00000 | 0.05241 |
| left Reticular nucleus of the thalamus           | -0.02916 | -1.38450 | 0.00000 | 0.32006 |
| left Retrochiasmatic area                        | 0.00324  | 1.34685  | 0.00000 | 0.33318 |
| left Retroparafascicular nucleus                 | -0.00214 | -2.29301 | 0.00000 | 0.09860 |
| left Retrosplenial area, dorsal part             | -0.02090 | -0.58483 | 0.00000 | 0.68426 |
| left Retrosplenial area, lateral agranular part  | -0.02991 | -1.24721 | 0.00000 | 0.36349 |
| left Retrosplenial area, ventral part            | 0.03619  | 0.79675  | 0.00000 | 0.57805 |
| left Rostrolateral area                          | -0.04052 | -3.16692 | 0.00000 | 0.02841 |
| left rubrospinal tract                           | -0.01085 | -2.76394 | 0.00000 | 0.05017 |
| left Secondary motor area                        | 0.09563  | 0.96065  | 0.00000 | 0.50136 |
| left sensory root of the trigeminal nerve        | -0.00130 | -0.20956 | 0.00000 | 0.88876 |
| left Septohippocampal nucleus                    | -0.00077 | -0.89842 | 0.00000 | 0.53013 |
| left Simple lobule                               | -0.38405 | -4.48241 | 0.00000 | 0.00471 |

|                                                        |          |          |         |         |
|--------------------------------------------------------|----------|----------|---------|---------|
| left solitary tract                                    | 0.00005  | 0.16016  | 0.00000 | 0.91127 |
| left Spinal nucleus of the trigeminal, caudal part     | -0.01056 | -0.50971 | 0.00000 | 0.72153 |
| left Spinal nucleus of the trigeminal, interpolar part | 0.00823  | 0.37234  | 0.00000 | 0.79816 |
| left Spinal nucleus of the trigeminal, oral part       | -0.01718 | -1.52795 | 0.00000 | 0.26926 |
| left spinal tract of the trigeminal nerve              | -0.01964 | -1.25467 | 0.00000 | 0.36001 |
| left Spinal vestibular nucleus                         | 0.00716  | 0.73236  | 0.00000 | 0.61181 |
| left stria medullaris                                  | -0.00839 | -2.21630 | 0.00000 | 0.10851 |
| left stria terminalis                                  | -0.00198 | -0.42548 | 0.00000 | 0.77419 |
| left Subceruleus nucleus                               | -0.00031 | -0.57847 | 0.00000 | 0.68610 |
| left subependymal zone                                 | 0.00003  | 0.01212  | 0.00749 | 0.99304 |
| left Subgeniculate nucleus                             | -0.00060 | -0.96803 | 0.00000 | 0.49900 |
| left Subiculum                                         | -0.05684 | -1.99709 | 0.00000 | 0.14773 |
| left Sublaterodorsal nucleus                           | 0.00073  | 0.78701  | 0.00000 | 0.58338 |
| left Submedial nucleus of the thalamus                 | -0.01100 | -2.08699 | 0.00000 | 0.12998 |
| left Subparafascicular area                            | -0.00418 | -1.63613 | 0.00000 | 0.23866 |
| left Subparafascicular nucleus                         | -0.00861 | -3.18475 | 0.00000 | 0.02760 |
| left Subparaventricular zone                           | -0.00092 | -0.46954 | 0.00000 | 0.74397 |
| left Substantia innominata                             | -0.07261 | -1.96584 | 0.00000 | 0.15318 |
| left Substantia nigra, compact part                    | -0.00048 | -0.16759 | 0.00000 | 0.90773 |
| left Substantia nigra, reticular part                  | -0.01266 | -0.72708 | 0.00000 | 0.61382 |
| left Subthalamic nucleus                               | -0.00360 | -1.73554 | 0.00000 | 0.21128 |
| left Superior central nucleus raphe                    | -0.01552 | -1.89577 | 0.00000 | 0.16872 |
| left superior cerebellar peduncles                     | -0.02925 | -4.04164 | 0.00000 | 0.00806 |
| left Superior colliculus                               | -0.18710 | -2.36925 | 0.00000 | 0.08953 |
| left Superior olivary complex, lateral part            | -0.00689 | -1.69171 | 0.00000 | 0.22374 |
| left Superior olivary complex, medial part             | -0.00198 | -1.12217 | 0.00000 | 0.42110 |
| left Superior olivary complex, periolivary region      | -0.00441 | -0.92808 | 0.00000 | 0.51593 |
| left Superior vestibular nucleus                       | -0.00795 | -1.58413 | 0.00000 | 0.25167 |
| left Supplemental somatosensory area                   | -0.17502 | -2.06250 | 0.00000 | 0.13445 |
| left supra-callosal cerebral white matter              | -0.02787 | -2.61433 | 0.00000 | 0.06195 |
| left Suprachiasmatic nucleus                           | 0.00043  | 0.47630  | 0.00000 | 0.73962 |
| left Suprageniculate nucleus                           | -0.01038 | -5.33423 | 0.00000 | 0.00184 |
| left Supragenual nucleus                               | 0.00012  | 0.33466  | 0.00000 | 0.81894 |
| left Supramammillary nucleus                           | -0.00532 | -1.99294 | 0.00000 | 0.14773 |
| left Supraoculomotor periaqueductal gray               | -0.00131 | -2.05343 | 0.00000 | 0.13522 |
| left supraoptic commissures                            | -0.00044 | -0.76443 | 0.00000 | 0.59748 |
| left Supraoptic nucleus                                | -0.00075 | -1.26181 | 0.00000 | 0.35821 |
| left Supratrigeminal nucleus                           | -0.00595 | -1.59750 | 0.00000 | 0.25024 |
| left Taenia tecta, dorsal part                         | -0.05625 | -4.85898 | 0.00000 | 0.00303 |
| left Taenia tecta, ventral part                        | -0.02158 | -2.19572 | 0.00000 | 0.11109 |

|                                                       |          |          |         |         |
|-------------------------------------------------------|----------|----------|---------|---------|
| left Tegmental reticular nucleus                      | -0.02946 | -3.40251 | 0.00000 | 0.02017 |
| left Temporal association areas                       | -0.04324 | -1.25767 | 0.00000 | 0.35933 |
| left trapezoid body                                   | -0.00446 | -1.42713 | 0.00000 | 0.30592 |
| left trochlear nerve                                  | -0.00090 | -3.92679 | 0.00000 | 0.00916 |
| left Trochlear nucleus                                | 0.00017  | 0.65780  | 0.00000 | 0.65256 |
| left Tuberal nucleus                                  | 0.00863  | 0.97099  | 0.00000 | 0.49880 |
| left Tuberomammillary nucleus, dorsal part            | -0.00014 | -0.21418 | 0.00000 | 0.88876 |
| left Tuberomammillary nucleus, ventral part           | 0.00032  | 0.13190  | 0.00001 | 0.92790 |
| left uncinata fascicle                                | -0.00340 | -2.40443 | 0.00000 | 0.08462 |
| left Ventral anterior-lateral complex of the thalamus | -0.01262 | -1.02973 | 0.00000 | 0.46789 |
| left Ventral auditory area                            | -0.03686 | -2.30957 | 0.00000 | 0.09607 |
| left Ventral cochlear nucleus                         | -0.01845 | -1.58261 | 0.00000 | 0.25170 |
| left Ventral medial nucleus of the thalamus           | -0.00611 | -0.33396 | 0.00000 | 0.81894 |
| left Ventral part of the lateral geniculate complex   | -0.01107 | -1.85998 | 0.00000 | 0.17624 |
| left Ventral posterolateral nucleus of the thalamus   | -0.00115 | -0.07251 | 0.00006 | 0.96176 |
| left Ventral posteromedial nucleus of the thalamus    | 0.02635  | 0.80400  | 0.00000 | 0.57560 |
| left Ventral premammillary nucleus                    | -0.00352 | -1.27318 | 0.00000 | 0.35331 |
| left ventral spinocerebellar tract                    | -0.00313 | -1.30866 | 0.00000 | 0.34178 |
| left Ventral tegmental area                           | -0.01578 | -2.84321 | 0.00000 | 0.04558 |
| left Ventral tegmental nucleus                        | -0.00116 | -2.14789 | 0.00000 | 0.11964 |
| left Ventrolateral preoptic nucleus                   | 0.00021  | 0.17300  | 0.00000 | 0.90458 |
| left Ventromedial hypothalamic nucleus                | -0.00001 | -0.00143 | 0.03994 | 0.99999 |
| left Ventromedial preoptic nucleus                    | -0.00009 | -0.06891 | 0.00007 | 0.96250 |
| left vestibular nerve                                 | -0.00060 | -0.14204 | 0.00001 | 0.92345 |
| left Vestibulocerebellar nucleus                      | -0.00406 | -2.49058 | 0.00000 | 0.07629 |
| left Visceral area                                    | -0.03529 | -1.60234 | 0.00000 | 0.24876 |
| left vomeronasal nerve                                | -0.00008 | -0.20776 | 0.00000 | 0.88876 |
| left Xiphoid thalamic nucleus                         | -0.00460 | -1.99288 | 0.00000 | 0.14773 |
| left Zona incerta                                     | -0.03102 | -1.98496 | 0.00000 | 0.14859 |
| Lobule II                                             | -0.02375 | -0.35551 | 0.00000 | 0.80716 |
| Lobule III                                            | -0.40193 | -3.11646 | 0.00000 | 0.03055 |
| Lobules IV-V                                          | -1.06788 | -4.55289 | 0.00000 | 0.00451 |
| Medial septal nucleus                                 | -0.00229 | -0.26558 | 0.00000 | 0.85832 |
| Median eminence                                       | -0.00201 | -1.33800 | 0.00000 | 0.33426 |
| Median preoptic nucleus                               | -0.00270 | -1.64661 | 0.00000 | 0.23555 |
| Nodulus (X)                                           | -0.10453 | -1.38234 | 0.00000 | 0.32047 |
| Nucleus raphe magnus                                  | -0.00552 | -0.70336 | 0.00000 | 0.62595 |
| Nucleus raphe obscurus                                | -0.00749 | -2.59706 | 0.00000 | 0.06395 |
| Nucleus raphe pallidus                                | -0.00299 | -1.43939 | 0.00000 | 0.30113 |
| Nucleus raphe pontis                                  | 0.00108  | 0.59798  | 0.00000 | 0.67597 |

|                                                     |          |          |         |         |
|-----------------------------------------------------|----------|----------|---------|---------|
| optic chiasm                                        | -0.01023 | -1.13808 | 0.00000 | 0.41527 |
| Periaqueductal gray                                 | -0.25829 | -3.24548 | 0.00000 | 0.02539 |
| posterior commissure                                | -0.00099 | -0.67053 | 0.00000 | 0.64636 |
| pyramidal decussation                               | -0.00145 | -0.53479 | 0.00000 | 0.70689 |
| Pyramus (VIII)                                      | -0.25319 | -4.26321 | 0.00000 | 0.00571 |
| Rhomboid nucleus                                    | -0.00479 | -2.28668 | 0.00000 | 0.09913 |
| right Abducens nucleus                              | -0.00025 | -0.72134 | 0.00000 | 0.61618 |
| right Accessory facial motor nucleus                | 0.00019  | 0.83247  | 0.00000 | 0.56428 |
| right Accessory olfactory bulb                      | -0.00585 | -0.55570 | 0.00000 | 0.69669 |
| right Accessory supraoptic group                    | -0.00009 | -0.55165 | 0.00000 | 0.69776 |
| right Accessory trigeminal nucleus                  | 0.00020  | 0.37220  | 0.00000 | 0.79816 |
| right Agranular insular area, dorsal part           | -0.12401 | -3.36037 | 0.00000 | 0.02161 |
| right Agranular insular area, posterior part        | -0.00441 | -0.23482 | 0.00000 | 0.87993 |
| right Agranular insular area, ventral part          | -0.08377 | -4.21290 | 0.00000 | 0.00591 |
| right alveus                                        | -0.03188 | -3.73852 | 0.00000 | 0.01240 |
| right amygdalar capsule                             | 0.00023  | 0.10684  | 0.00002 | 0.94059 |
| right Anterior amygdalar area                       | -0.01429 | -2.32726 | 0.00000 | 0.09418 |
| right Anterior area                                 | -0.02146 | -1.09478 | 0.00000 | 0.43518 |
| right Anterior cingulate area                       | 0.02128  | 0.60215  | 0.00000 | 0.67459 |
| right Anterior cingulate area, ventral part         | 0.01329  | 0.55293  | 0.00000 | 0.69776 |
| right Anterior hypothalamic nucleus                 | 0.00015  | 0.02313  | 0.00388 | 0.98565 |
| right Anterior olfactory nucleus                    | -0.18309 | -5.08183 | 0.00000 | 0.00249 |
| right Anterior pretectal nucleus                    | -0.05504 | -4.78565 | 0.00000 | 0.00324 |
| right Anterior tegmental nucleus                    | -0.00105 | -2.08702 | 0.00000 | 0.12998 |
| right Anterodorsal nucleus                          | -0.00180 | -0.75374 | 0.00000 | 0.60258 |
| right Anterodorsal preoptic nucleus                 | -0.00254 | -2.47999 | 0.00000 | 0.07708 |
| right Anterolateral visual area                     | -0.01546 | -1.44963 | 0.00000 | 0.29740 |
| right Anteromedial nucleus, dorsal part             | -0.00871 | -2.69797 | 0.00000 | 0.05514 |
| right Anteromedial nucleus, ventral part            | -0.00358 | -1.40913 | 0.00000 | 0.31157 |
| right Anteromedial visual area                      | -0.01432 | -1.07390 | 0.00000 | 0.44529 |
| right Anteroventral nucleus of thalamus             | -0.00538 | -0.83509 | 0.00000 | 0.56428 |
| right Anteroventral periventricular nucleus         | -0.00155 | -0.64192 | 0.00000 | 0.65934 |
| right Anteroventral preoptic nucleus                | 0.00153  | 1.28400  | 0.00000 | 0.35071 |
| right Arcuate hypothalamic nucleus                  | 0.00110  | 0.27052  | 0.00000 | 0.85752 |
| right Area postrema                                 | -0.00184 | -0.91283 | 0.00000 | 0.52590 |
| right Area prostriata                               | -0.01838 | -3.54167 | 0.00000 | 0.01652 |
| right auditory radiation                            | -0.00682 | -1.33731 | 0.00000 | 0.33426 |
| right Barrington's nucleus                          | -0.00087 | -2.46703 | 0.00000 | 0.07800 |
| right Basolateral amygdalar nucleus, anterior part  | -0.02731 | -3.06541 | 0.00000 | 0.03214 |
| right Basolateral amygdalar nucleus, posterior part | -0.02417 | -3.09884 | 0.00000 | 0.03074 |

|                                                             |          |          |         |         |
|-------------------------------------------------------------|----------|----------|---------|---------|
| right Basolateral amygdalar nucleus, ventral part           | -0.00977 | -2.61832 | 0.00000 | 0.06171 |
| right Basomedial amygdalar nucleus, anterior part           | -0.02236 | -2.90772 | 0.00000 | 0.04102 |
| right Basomedial amygdalar nucleus, posterior part          | -0.03062 | -5.63242 | 0.00000 | 0.00169 |
| right Bed nuclei of the stria terminalis                    | -0.04294 | -3.33240 | 0.00000 | 0.02227 |
| right Bed nucleus of the accessory olfactory tract          | -0.00093 | -2.07440 | 0.00000 | 0.13234 |
| right Bed nucleus of the anterior commissure                | -0.00146 | -3.47164 | 0.00000 | 0.01805 |
| right brachium of the inferior colliculus                   | -0.00951 | -4.01118 | 0.00000 | 0.00840 |
| right brachium of the superior colliculus                   | -0.01281 | -4.80388 | 0.00000 | 0.00324 |
| right Caudoputamen                                          | -0.61192 | -3.12693 | 0.00000 | 0.03048 |
| right Central amygdalar nucleus                             | -0.06193 | -4.77470 | 0.00000 | 0.00324 |
| right Central lateral nucleus of the thalamus               | -0.00863 | -1.71473 | 0.00000 | 0.21582 |
| right Central medial nucleus of the thalamus                | -0.00545 | -1.92803 | 0.00000 | 0.16114 |
| right cerebral peduncle                                     | -0.02164 | -1.72169 | 0.00000 | 0.21429 |
| right choroid plexus                                        | -0.00682 | -0.38016 | 0.00000 | 0.79631 |
| right cingulum bundle                                       | -0.02669 | -2.28076 | 0.00000 | 0.09972 |
| right Claustrum                                             | -0.01630 | -3.25760 | 0.00000 | 0.02509 |
| right columns of the fornix                                 | -0.01128 | -4.62189 | 0.00000 | 0.00407 |
| right commissural branch of stria terminalis                | -0.00057 | -1.00273 | 0.00000 | 0.48232 |
| right Copula pyramidis                                      | -0.17200 | -3.97798 | 0.00000 | 0.00870 |
| right Cortical amygdalar area, anterior part                | -0.02407 | -2.35657 | 0.00000 | 0.09147 |
| right Cortical amygdalar area, posterior part, lateral zone | -0.03794 | -3.07702 | 0.00000 | 0.03183 |
| right Cortical amygdalar area, posterior part, medial zone  | -0.05196 | -4.51766 | 0.00000 | 0.00466 |
| right Cortical subplate                                     | -0.00622 | -2.32465 | 0.00000 | 0.09425 |
| right corticospinal tract                                   | -0.00599 | -6.11969 | 0.00000 | 0.00136 |
| right crossed tectospinal pathway                           | -0.01187 | -1.68130 | 0.00000 | 0.22734 |
| right Crus 1                                                | -0.25054 | -2.43778 | 0.00000 | 0.08030 |
| right Crus 2                                                | -0.15789 | -1.59157 | 0.00000 | 0.25093 |
| right cuneate fascicle                                      | 0.00098  | 1.71711  | 0.00000 | 0.21548 |
| right Cuneate nucleus                                       | 0.00583  | 0.89783  | 0.00000 | 0.53013 |
| right Cuneiform nucleus                                     | -0.01808 | -2.51726 | 0.00000 | 0.07323 |
| right Dentate gyrus                                         | -0.29659 | -5.18733 | 0.00000 | 0.00215 |
| right Dentate nucleus                                       | -0.02165 | -5.97748 | 0.00000 | 0.00151 |
| right Diagonal band nucleus                                 | -0.00464 | -0.58708 | 0.00000 | 0.68356 |
| right dorsal acoustic stria                                 | -0.00033 | -0.96389 | 0.00000 | 0.50096 |
| right Dorsal auditory area                                  | -0.02712 | -1.93026 | 0.00000 | 0.16095 |
| right Dorsal cochlear nucleus                               | -0.00604 | -0.52402 | 0.00000 | 0.71295 |
| right dorsal limb                                           | -0.00750 | -1.79486 | 0.00000 | 0.19396 |
| right Dorsal motor nucleus of the vagus nerve               | -0.00257 | -0.85347 | 0.00000 | 0.55493 |
| right Dorsal nucleus raphe                                  | 0.00071  | 0.27420  | 0.00000 | 0.85607 |
| right Dorsal part of the lateral geniculate complex         | -0.04044 | -5.29694 | 0.00000 | 0.00189 |



|                                                            |          |          |         |         |
|------------------------------------------------------------|----------|----------|---------|---------|
| right Dorsal peduncular area                               | -0.03313 | -4.72810 | 0.00000 | 0.00331 |
| right Dorsal premammillary nucleus                         | -0.00250 | -1.36637 | 0.00000 | 0.32674 |
| right dorsal spinocerebellar tract                         | -0.00022 | -0.21864 | 0.00000 | 0.88876 |
| right Dorsal tegmental nucleus                             | 0.00074  | 0.72388  | 0.00000 | 0.61525 |
| right Dorsal terminal nucleus of the accessory optic tract | -0.00111 | -3.94966 | 0.00000 | 0.00904 |
| right Dorsomedial nucleus of the hypothalamus              | -0.01006 | -2.38076 | 0.00000 | 0.08811 |
| right Ectorhinal area                                      | -0.04476 | -2.33890 | 0.00000 | 0.09335 |
| right Endopiriform nucleus, dorsal part                    | -0.05915 | -3.33786 | 0.00000 | 0.02225 |
| right Endopiriform nucleus, ventral part                   | -0.02679 | -3.20596 | 0.00000 | 0.02671 |
| right Entorhinal area, lateral part                        | -0.27491 | -4.30980 | 0.00000 | 0.00571 |
| right Entorhinal area, medial part, dorsal zone            | -0.18937 | -3.04914 | 0.00000 | 0.03298 |
| right Ethmoid nucleus of the thalamus                      | -0.00910 | -3.43652 | 0.00000 | 0.01935 |
| right external capsule                                     | -0.01845 | -3.10102 | 0.00000 | 0.03074 |
| right External cuneate nucleus                             | -0.00246 | -0.57848 | 0.00000 | 0.68610 |
| right external medullary lamina of the thalamus            | -0.00433 | -2.47449 | 0.00000 | 0.07763 |
| right Facial motor nucleus                                 | -0.00659 | -0.55628 | 0.00000 | 0.69669 |
| right facial nerve                                         | -0.00161 | -1.23691 | 0.00000 | 0.36864 |
| right fasciculus retroflexus                               | -0.00406 | -2.11486 | 0.00000 | 0.12513 |
| right Fasciola cinerea                                     | -0.00268 | -1.65942 | 0.00000 | 0.23264 |
| right Fastigial nucleus                                    | -0.04685 | -6.42795 | 0.00000 | 0.00133 |
| right Field CA1                                            | -0.30035 | -2.82427 | 0.00000 | 0.04671 |
| right Field CA2                                            | -0.01990 | -3.83388 | 0.00000 | 0.01063 |
| right Field CA3                                            | -0.28152 | -4.26711 | 0.00000 | 0.00571 |
| right Fields of Forel                                      | -0.00822 | -2.77327 | 0.00000 | 0.04994 |
| right fimbria                                              | -0.01018 | -0.49833 | 0.00000 | 0.72628 |
| right Flocculus                                            | -0.05502 | -2.18813 | 0.00000 | 0.11227 |
| right Frontal pole                                         | 0.00930  | 0.90584  | 0.00000 | 0.52902 |
| right Fundus of striatum                                   | 0.00027  | 0.03479  | 0.00084 | 0.98028 |
| right Gigantocellular reticular nucleus                    | -0.04131 | -1.39467 | 0.00000 | 0.31763 |
| right Globus pallidus, external segment                    | -0.04437 | -3.53685 | 0.00000 | 0.01652 |
| right Globus pallidus, internal segment                    | -0.01695 | -3.01184 | 0.00000 | 0.03512 |
| right Gracile nucleus                                      | 0.00021  | 0.14752  | 0.00001 | 0.92026 |
| right Gustatory areas                                      | -0.03675 | -2.80426 | 0.00000 | 0.04772 |
| right Hippocampal formation                                | -0.01327 | -2.91682 | 0.00000 | 0.04092 |
| right Hippocampo-amygdalar transition area                 | -0.01206 | -2.90953 | 0.00000 | 0.04102 |
| right inferior cerebellar peduncle                         | -0.02203 | -2.33001 | 0.00000 | 0.09418 |
| right Inferior colliculus                                  | -0.16767 | -2.83500 | 0.00000 | 0.04589 |
| right Inferior olivary complex                             | -0.01072 | -1.32057 | 0.00000 | 0.34042 |
| right Inferior salivatory nucleus                          | -0.00044 | -1.32934 | 0.00000 | 0.33711 |
| right Infracerebellar nucleus                              | -0.00605 | -4.20333 | 0.00000 | 0.00594 |

|                                                                 |          |          |         |         |
|-----------------------------------------------------------------|----------|----------|---------|---------|
| right Infralimbic area                                          | -0.02691 | -2.85097 | 0.00000 | 0.04508 |
| right Interanterodorsal nucleus of the thalamus                 | -0.00422 | -2.69419 | 0.00000 | 0.05514 |
| right Intercalated amygdalar nucleus                            | -0.00415 | -1.79453 | 0.00000 | 0.19396 |
| right Intergeniculate leaflet of the lateral geniculate complex | -0.00374 | -3.43035 | 0.00000 | 0.01937 |
| right Intermediate geniculate nucleus                           | -0.00041 | -1.21894 | 0.00000 | 0.37525 |
| right Intermediate reticular nucleus                            | -0.04120 | -1.28130 | 0.00000 | 0.35071 |
| right internal capsule                                          | -0.07863 | -2.77890 | 0.00000 | 0.04960 |
| right Interposed nucleus                                        | -0.06742 | -5.66861 | 0.00000 | 0.00169 |
| right Interstitial nucleus of Cajal                             | -0.00489 | -4.21363 | 0.00000 | 0.00591 |
| right Intertrigeminal nucleus                                   | -0.00019 | -0.17578 | 0.00000 | 0.90458 |
| right Koelliker-Fuse subnucleus                                 | -0.00820 | -3.22760 | 0.00000 | 0.02584 |
| right Lateral amygdalar nucleus                                 | -0.00713 | -0.41121 | 0.00000 | 0.78012 |
| right Lateral dorsal nucleus of thalamus                        | -0.03179 | -2.45007 | 0.00000 | 0.07998 |
| right Lateral habenula                                          | -0.00348 | -0.66094 | 0.00000 | 0.65256 |
| right Lateral hypothalamic area                                 | -0.07339 | -3.49395 | 0.00000 | 0.01748 |
| right lateral lemniscus                                         | -0.02112 | -2.44489 | 0.00000 | 0.07998 |
| right Lateral mammillary nucleus                                | 0.00113  | 0.42051  | 0.00000 | 0.77711 |
| right lateral olfactory tract, body                             | -0.02031 | -1.74166 | 0.00000 | 0.20952 |
| right Lateral posterior nucleus of the thalamus                 | -0.06754 | -5.00696 | 0.00000 | 0.00281 |
| right Lateral preoptic area                                     | -0.00905 | -1.63717 | 0.00000 | 0.23866 |
| right lateral recess                                            | -0.00508 | -0.94741 | 0.00000 | 0.50694 |
| right Lateral reticular nucleus, magnocellular part             | -0.00906 | -1.31140 | 0.00000 | 0.34161 |
| right Lateral reticular nucleus, parvicellular part             | -0.00091 | -1.66557 | 0.00000 | 0.23195 |
| right Lateral septal nucleus, caudal (caudodorsal) part         | -0.01045 | -1.57963 | 0.00000 | 0.25238 |
| right Lateral septal nucleus, rostral (rostroventral) part      | -0.02005 | -0.84424 | 0.00000 | 0.55950 |
| right Lateral septal nucleus, ventral part                      | -0.01413 | -1.95532 | 0.00000 | 0.15486 |
| right Lateral terminal nucleus of the accessory optic tract     | -0.00066 | -1.34665 | 0.00000 | 0.33318 |
| right lateral ventricle                                         | -0.00839 | -0.21891 | 0.00000 | 0.88876 |
| right Lateral vestibular nucleus                                | -0.00390 | -1.12001 | 0.00000 | 0.42163 |
| right Lateral visual area                                       | -0.00284 | -0.12948 | 0.00001 | 0.92797 |
| right Laterodorsal tegmental nucleus                            | -0.00054 | -0.23934 | 0.00000 | 0.87744 |
| right Laterointermediate area                                   | -0.00045 | -0.05148 | 0.00028 | 0.97087 |
| right Linear nucleus of the medulla                             | -0.00008 | -0.10680 | 0.00002 | 0.94059 |
| right Lingula (I)                                               | 0.00170  | 0.56057  | 0.00000 | 0.69497 |
| right Locus ceruleus                                            | 0.00012  | 0.31539  | 0.00000 | 0.83062 |
| right Magnocellular nucleus                                     | -0.01378 | -2.25973 | 0.00000 | 0.10237 |
| right Magnocellular reticular nucleus                           | -0.01453 | -1.84033 | 0.00000 | 0.18075 |
| right Main olfactory bulb                                       | -1.20993 | -5.16981 | 0.00000 | 0.00215 |
| right mammillary peduncle                                       | -0.00111 | -1.16436 | 0.00000 | 0.40392 |
| right mammillotegmental tract                                   | -0.00497 | -2.28003 | 0.00000 | 0.09972 |

|                                                            |          |          |         |         |
|------------------------------------------------------------|----------|----------|---------|---------|
| right mammillothalamic tract                               | -0.00346 | -1.82356 | 0.00000 | 0.18594 |
| right Medial accesory oculomotor nucleus                   | -0.00256 | -2.48910 | 0.00000 | 0.07629 |
| right Medial amygdalar nucleus                             | -0.09316 | -5.47603 | 0.00000 | 0.00184 |
| right medial corticohypothalamic tract                     | -0.00043 | -1.22811 | 0.00000 | 0.37143 |
| right medial forebrain bundle                              | -0.00130 | -1.93920 | 0.00000 | 0.15872 |
| right Medial geniculate complex, dorsal part               | -0.00683 | -4.11368 | 0.00000 | 0.00706 |
| right Medial geniculate complex, medial part               | -0.00611 | -2.48616 | 0.00000 | 0.07643 |
| right Medial geniculate complex, ventral part              | -0.00777 | -2.10822 | 0.00000 | 0.12635 |
| right Medial habenula                                      | -0.00609 | -0.91109 | 0.00000 | 0.52619 |
| right medial lemniscus                                     | -0.03074 | -4.45818 | 0.00000 | 0.00471 |
| right medial longitudinal fascicle                         | -0.00191 | -0.75430 | 0.00000 | 0.60258 |
| right Medial mammillary nucleus                            | -0.00593 | -0.63709 | 0.00000 | 0.66209 |
| right Medial preoptic area                                 | -0.00475 | -0.83674 | 0.00000 | 0.56408 |
| right Medial preoptic nucleus                              | -0.00699 | -1.65400 | 0.00000 | 0.23366 |
| right Medial pretectal area                                | 0.00003  | 0.03918  | 0.00039 | 0.97937 |
| right Medial terminal nucleus of the accessory optic tract | -0.00131 | -1.28049 | 0.00000 | 0.35071 |
| right Medial vestibular nucleus                            | -0.00343 | -0.19579 | 0.00000 | 0.89590 |
| right Mediodorsal nucleus of thalamus                      | -0.01828 | -1.37259 | 0.00000 | 0.32416 |
| right Medullary reticular nucleus, dorsal part             | -0.01249 | -0.78523 | 0.00000 | 0.58371 |
| right Medullary reticular nucleus, ventral part            | 0.00134  | 0.07539  | 0.00005 | 0.96073 |
| right Midbrain reticular nucleus                           | -0.18304 | -3.89816 | 0.00000 | 0.00953 |
| right Midbrain reticular nucleus, retrorubral area         | -0.00311 | -1.54964 | 0.00000 | 0.26194 |
| right Midbrain trigeminal nucleus                          | -0.00118 | -3.16517 | 0.00000 | 0.02841 |
| right middle cerebellar peduncle                           | -0.03423 | -2.69643 | 0.00000 | 0.05514 |
| right Motor nucleus of trigeminal                          | -0.00466 | -0.99567 | 0.00000 | 0.48534 |
| right motor root of the trigeminal nerve                   | 0.00099  | 1.15398  | 0.00000 | 0.40787 |
| right nigrostriatal tract                                  | -0.00344 | -2.68336 | 0.00000 | 0.05585 |
| right Nucleus accumbens                                    | -0.16317 | -3.21002 | 0.00000 | 0.02666 |
| right Nucleus ambiguus, dorsal division                    | 0.00059  | 0.81037  | 0.00000 | 0.57183 |
| right Nucleus ambiguus, ventral division                   | -0.00012 | -0.18301 | 0.00000 | 0.90015 |
| right Nucleus incertus                                     | 0.00057  | 0.39992  | 0.00000 | 0.78590 |
| right Nucleus of Darkschewitsch                            | -0.00508 | -2.63698 | 0.00000 | 0.06020 |
| right Nucleus of reuniens                                  | -0.03211 | -5.81581 | 0.00000 | 0.00158 |
| right Nucleus of Roller                                    | -0.00089 | -1.38545 | 0.00000 | 0.32006 |
| right Nucleus of the brachium of the inferior colliculus   | -0.00342 | -3.73483 | 0.00000 | 0.01240 |
| right Nucleus of the lateral lemniscus                     | -0.01630 | -1.94256 | 0.00000 | 0.15818 |
| right Nucleus of the lateral olfactory tract               | -0.00963 | -2.49918 | 0.00000 | 0.07570 |
| right Nucleus of the optic tract                           | -0.01127 | -4.87751 | 0.00000 | 0.00303 |
| right Nucleus of the posterior commissure                  | -0.00328 | -1.20160 | 0.00000 | 0.38386 |
| right Nucleus of the solitary tract                        | -0.00791 | -0.71290 | 0.00000 | 0.62063 |

|                                                           |          |          |         |         |
|-----------------------------------------------------------|----------|----------|---------|---------|
| right Nucleus of the trapezoid body                       | -0.00352 | -2.22782 | 0.00000 | 0.10718 |
| right Nucleus prepositus                                  | 0.00076  | 0.26574  | 0.00000 | 0.85832 |
| right Nucleus sagulum                                     | -0.00270 | -2.47022 | 0.00000 | 0.07798 |
| right Nucleus x                                           | -0.00069 | -0.54443 | 0.00000 | 0.70069 |
| right Nucleus y                                           | -0.00093 | -2.26806 | 0.00000 | 0.10141 |
| right oculomotor nerve                                    | -0.00008 | -0.18832 | 0.00000 | 0.89829 |
| right Oculomotor nucleus                                  | -0.00144 | -1.72376 | 0.00000 | 0.21407 |
| right olfactory nerve layer of main olfactory bulb        | -0.09901 | -2.44975 | 0.00000 | 0.07998 |
| right Olfactory tubercle                                  | -0.10479 | -2.09472 | 0.00000 | 0.12930 |
| right Olivary pretectal nucleus                           | -0.00159 | -2.06554 | 0.00000 | 0.13421 |
| right optic nerve                                         | -0.00057 | -0.37875 | 0.00000 | 0.79631 |
| right optic radiation                                     | -0.06211 | -2.81250 | 0.00000 | 0.04714 |
| right optic tract                                         | -0.01527 | -1.45603 | 0.00000 | 0.29561 |
| right Orbital area, lateral part                          | -0.05678 | -2.18499 | 0.00000 | 0.11231 |
| right Orbital area, medial part                           | -0.05566 | -3.99643 | 0.00000 | 0.00857 |
| right Orbital area, ventrolateral part                    | -0.04336 | -2.22321 | 0.00000 | 0.10779 |
| right Parabigeminal nucleus                               | -0.00280 | -3.52336 | 0.00000 | 0.01682 |
| right Parabrachial nucleus                                | -0.03760 | -3.25924 | 0.00000 | 0.02509 |
| right Paracentral nucleus                                 | -0.00584 | -1.23148 | 0.00000 | 0.37101 |
| right Parafascicular nucleus                              | -0.00580 | -0.65566 | 0.00000 | 0.65256 |
| right Paraflocculus                                       | -0.15942 | -2.69737 | 0.00000 | 0.05514 |
| right Paragigantocellular reticular nucleus, dorsal part  | 0.00243  | 0.71895  | 0.00000 | 0.61700 |
| right Paragigantocellular reticular nucleus, lateral part | -0.00714 | -0.63239 | 0.00000 | 0.66333 |
| right Paramedian lobule                                   | -0.32642 | -3.48665 | 0.00000 | 0.01761 |
| right Paranigral nucleus                                  | -0.00099 | -1.30123 | 0.00000 | 0.34513 |
| right Parapyramidal nucleus                               | -0.00103 | -0.60364 | 0.00000 | 0.67459 |
| right Parasolitary nucleus                                | 0.00043  | 0.58098  | 0.00000 | 0.68610 |
| right Parastrial nucleus                                  | -0.00110 | -1.31551 | 0.00000 | 0.34117 |
| right Parasubiculum                                       | -0.05967 | -4.97177 | 0.00000 | 0.00281 |
| right Parasubthalamic nucleus                             | -0.00479 | -2.81922 | 0.00000 | 0.04671 |
| right Parataenial nucleus                                 | -0.01037 | -3.54913 | 0.00000 | 0.01652 |
| right Paratrigeminal nucleus                              | -0.00322 | -1.55915 | 0.00000 | 0.26022 |
| right Paratrochlear nucleus                               | -0.00075 | -2.34672 | 0.00000 | 0.09253 |
| right Paraventricular hypothalamic nucleus                | -0.02639 | -4.60405 | 0.00000 | 0.00413 |
| right Paraventricular nucleus of the thalamus             | -0.00276 | -0.37871 | 0.00000 | 0.79631 |
| right Parvicellular motor 5 nucleus                       | 0.00068  | 0.56155  | 0.00000 | 0.69497 |
| right Parvicellular reticular nucleus                     | -0.04394 | -1.61316 | 0.00000 | 0.24533 |
| right Pedunclopontine nucleus                             | -0.03302 | -3.58125 | 0.00000 | 0.01594 |
| right Perifornical nucleus                                | -0.01003 | -3.63773 | 0.00000 | 0.01462 |
| right Peripeduncular nucleus                              | -0.00254 | -2.96884 | 0.00000 | 0.03756 |

|                                                  |          |          |         |         |
|--------------------------------------------------|----------|----------|---------|---------|
| right Perireunensis nucleus                      | -0.00713 | -4.37498 | 0.00000 | 0.00530 |
| right Perirhinal area                            | -0.03331 | -3.83683 | 0.00000 | 0.01063 |
| right Peritrigeminal zone                        | -0.00634 | -1.33923 | 0.00000 | 0.33426 |
| right Periventricular hypothalamic nucleus       | -0.01447 | -1.46912 | 0.00000 | 0.29193 |
| right Piriform area                              | -0.32990 | -2.49312 | 0.00000 | 0.07629 |
| right Piriform-amygdalar area                    | -0.02952 | -1.80622 | 0.00000 | 0.19091 |
| right Pontine central gray                       | 0.00331  | 0.48919  | 0.00000 | 0.73254 |
| right Pontine gray                               | -0.04914 | -3.20074 | 0.00000 | 0.02683 |
| right Pontine reticular nucleus                  | -0.05473 | -2.23392 | 0.00000 | 0.10665 |
| right Pontine reticular nucleus, caudal part     | -0.03981 | -1.91050 | 0.00000 | 0.16509 |
| right Posterior amygdalar nucleus                | -0.04414 | -4.86466 | 0.00000 | 0.00303 |
| right Posterior auditory area                    | -0.01014 | -1.34403 | 0.00000 | 0.33358 |
| right Posterior complex of the thalamus          | -0.01447 | -0.81946 | 0.00000 | 0.56825 |
| right Posterior hypothalamic nucleus             | -0.02916 | -2.69387 | 0.00000 | 0.05514 |
| right Posterior intralaminar thalamic nucleus    | -0.00381 | -1.54517 | 0.00000 | 0.26267 |
| right Posterior limiting nucleus of the thalamus | -0.00926 | -3.94906 | 0.00000 | 0.00904 |
| right Posterior pretectal nucleus                | -0.00644 | -2.95955 | 0.00000 | 0.03774 |
| right Posterior triangular thalamic nucleus      | -0.00943 | -3.14237 | 0.00000 | 0.02966 |
| right Posterodorsal preoptic nucleus             | 0.00003  | 0.16356  | 0.00000 | 0.90976 |
| right Posterodorsal tegmental nucleus            | 0.00072  | 0.81794  | 0.00000 | 0.56825 |
| right Posterolateral visual area                 | -0.00171 | -0.11441 | 0.00002 | 0.93698 |
| right posteromedial visual area                  | -0.01287 | -0.72732 | 0.00000 | 0.61382 |
| right Postpiriform transition area               | -0.02846 | -2.13228 | 0.00000 | 0.12255 |
| right Postrhinal area                            | -0.00121 | -0.06045 | 0.00020 | 0.96691 |
| right Postsubiculum                              | -0.05611 | -4.98917 | 0.00000 | 0.00281 |
| right Precommissural nucleus                     | 0.00474  | 1.44496  | 0.00000 | 0.29903 |
| right Prelimbic area                             | 0.00067  | 0.02956  | 0.00132 | 0.98313 |
| right Preparasubthalamic nucleus                 | -0.00027 | -0.73278 | 0.00000 | 0.61181 |
| right Presubiculum                               | -0.04720 | -5.40206 | 0.00000 | 0.00184 |
| right Primary auditory area                      | -0.03798 | -1.63177 | 0.00000 | 0.23989 |
| right Primary motor area                         | -0.02919 | -0.40770 | 0.00000 | 0.78141 |
| right Primary somatosensory area, barrel field   | -0.08305 | -1.02405 | 0.00000 | 0.46960 |
| right Primary somatosensory area, lower limb     | -0.01208 | -0.61417 | 0.00000 | 0.67276 |
| right Primary somatosensory area, mouth          | -0.08491 | -2.32161 | 0.00000 | 0.09443 |
| right Primary somatosensory area, nose           | -0.05444 | -2.03784 | 0.00000 | 0.13891 |
| right Primary somatosensory area, trunk          | -0.00993 | -0.56232 | 0.00000 | 0.69497 |
| right Primary somatosensory area, unassigned     | -0.01368 | -1.15943 | 0.00000 | 0.40532 |
| right Primary somatosensory area, upper limb     | -0.02014 | -0.61116 | 0.00000 | 0.67408 |
| right Primary visual area                        | -0.08950 | -0.79798 | 0.00000 | 0.57805 |
| right principal mammillary tract                 | -0.00017 | -0.20755 | 0.00000 | 0.88876 |

|                                                         |          |          |         |         |
|---------------------------------------------------------|----------|----------|---------|---------|
| right Principal sensory nucleus of the trigeminal       | -0.02000 | -1.34613 | 0.00000 | 0.33318 |
| right Prosubiculum                                      | -0.02290 | -1.46667 | 0.00000 | 0.29244 |
| right pyramid                                           | -0.00115 | -0.21489 | 0.00000 | 0.88876 |
| right Red nucleus                                       | -0.02305 | -2.44173 | 0.00000 | 0.07998 |
| right Reticular nucleus of the thalamus                 | -0.03714 | -1.45408 | 0.00000 | 0.29588 |
| right Retrochiasmatic area                              | 0.00141  | 0.53189  | 0.00000 | 0.70813 |
| right Retroparafascicular nucleus                       | -0.00155 | -1.66124 | 0.00000 | 0.23250 |
| right Retrosplenial area, dorsal part                   | 0.00462  | 0.10405  | 0.00003 | 0.94154 |
| right Retrosplenial area, lateral agranular part        | -0.01845 | -0.60107 | 0.00000 | 0.67459 |
| right Retrosplenial area, ventral part                  | 0.06354  | 1.27722  | 0.00000 | 0.35179 |
| right Rostrolateral area                                | -0.02228 | -1.35797 | 0.00000 | 0.33050 |
| right rubrospinal tract                                 | -0.00948 | -2.12566 | 0.00000 | 0.12332 |
| right Secondary motor area                              | 0.05431  | 0.54921  | 0.00000 | 0.69863 |
| right sensory root of the trigeminal nerve              | -0.00182 | -0.26949 | 0.00000 | 0.85752 |
| right Septohippocampal nucleus                          | -0.00056 | -0.63147 | 0.00000 | 0.66333 |
| right Simple lobule                                     | -0.44093 | -5.47004 | 0.00000 | 0.00184 |
| right solitary tract                                    | 0.00089  | 2.26160  | 0.00000 | 0.10236 |
| right Spinal nucleus of the trigeminal, caudal part     | -0.02208 | -1.08614 | 0.00000 | 0.43820 |
| right Spinal nucleus of the trigeminal, interpolar part | -0.03801 | -1.37497 | 0.00000 | 0.32363 |
| right Spinal nucleus of the trigeminal, oral part       | -0.02217 | -1.89235 | 0.00000 | 0.16882 |
| right spinal tract of the trigeminal nerve              | -0.01587 | -0.81921 | 0.00000 | 0.56825 |
| right Spinal vestibular nucleus                         | 0.00331  | 0.41335  | 0.00000 | 0.77967 |
| right stria medullaris                                  | -0.00683 | -2.07793 | 0.00000 | 0.13186 |
| right stria terminalis                                  | -0.00570 | -1.02792 | 0.00000 | 0.46789 |
| right Subceruleus nucleus                               | 0.00051  | 0.85307  | 0.00000 | 0.55493 |
| right subependymal zone                                 | -0.00099 | -0.43114 | 0.00000 | 0.77186 |
| right Subgeniculate nucleus                             | -0.00053 | -1.03103 | 0.00000 | 0.46789 |
| right Subiculum                                         | -0.05599 | -1.99062 | 0.00000 | 0.14773 |
| right Sublaterodorsal nucleus                           | -0.00055 | -0.82327 | 0.00000 | 0.56825 |
| right Submedial nucleus of the thalamus                 | -0.00908 | -1.85642 | 0.00000 | 0.17642 |
| right Subparafascicular area                            | -0.00352 | -1.28498 | 0.00000 | 0.35071 |
| right Subparafascicular nucleus                         | -0.00744 | -2.64614 | 0.00000 | 0.05957 |
| right Subparaventricular zone                           | -0.00499 | -2.27051 | 0.00000 | 0.10128 |
| right Substantia innominata                             | -0.05836 | -1.65660 | 0.00000 | 0.23319 |
| right Substantia nigra, compact part                    | -0.00334 | -1.25718 | 0.00000 | 0.35933 |
| right Substantia nigra, reticular part                  | -0.01112 | -0.64568 | 0.00000 | 0.65744 |
| right Subthalamic nucleus                               | -0.00254 | -1.28860 | 0.00000 | 0.34990 |
| right Superior central nucleus raphe                    | -0.01827 | -2.89383 | 0.00000 | 0.04203 |
| right superior cerebellar peduncles                     | -0.02617 | -3.59157 | 0.00000 | 0.01588 |
| right Superior colliculus                               | -0.22216 | -2.78487 | 0.00000 | 0.04923 |

|                                                        |          |          |         |         |
|--------------------------------------------------------|----------|----------|---------|---------|
| right Superior olivary complex, lateral part           | -0.00356 | -1.29164 | 0.00000 | 0.34896 |
| right Superior olivary complex, medial part            | -0.00207 | -2.21671 | 0.00000 | 0.10851 |
| right Superior olivary complex, periolivary region     | -0.00481 | -1.41498 | 0.00000 | 0.30927 |
| right Superior vestibular nucleus                      | -0.00735 | -1.41934 | 0.00000 | 0.30918 |
| right Supplemental somatosensory area                  | -0.19303 | -2.31995 | 0.00000 | 0.09443 |
| right supra-callosal cerebral white matter             | -0.02616 | -2.63632 | 0.00000 | 0.06020 |
| right Suprachiasmatic nucleus                          | -0.00141 | -1.46954 | 0.00000 | 0.29193 |
| right Suprageniculate nucleus                          | -0.00936 | -5.63620 | 0.00000 | 0.00169 |
| right Supragenual nucleus                              | 0.00029  | 0.81958  | 0.00000 | 0.56825 |
| right Supramammillary nucleus                          | -0.00513 | -1.58412 | 0.00000 | 0.25167 |
| right Supraoculomotor periaqueductal gray              | -0.00062 | -0.93724 | 0.00000 | 0.51226 |
| right supraoptic commissures                           | 0.00013  | 0.31323  | 0.00000 | 0.83121 |
| right Supraoptic nucleus                               | -0.00078 | -1.13135 | 0.00000 | 0.41700 |
| right Supratrigeminal nucleus                          | -0.00610 | -1.73206 | 0.00000 | 0.21203 |
| right Taenia tecta, dorsal part                        | -0.05351 | -4.43287 | 0.00000 | 0.00484 |
| right Taenia tecta, ventral part                       | -0.01559 | -1.59422 | 0.00000 | 0.25040 |
| right Tegmental reticular nucleus                      | -0.03168 | -3.30186 | 0.00000 | 0.02310 |
| right Temporal association areas                       | -0.04983 | -1.60899 | 0.00000 | 0.24651 |
| right trapezoid body                                   | -0.00272 | -0.96952 | 0.00000 | 0.49888 |
| right trochlear nerve                                  | -0.00005 | -0.29625 | 0.00000 | 0.84276 |
| right Trochlear nucleus                                | -0.00020 | -0.45477 | 0.00000 | 0.75483 |
| right Tuberal nucleus                                  | 0.01008  | 1.13941  | 0.00000 | 0.41527 |
| right Tuberomammillary nucleus, dorsal part            | -0.00208 | -2.20438 | 0.00000 | 0.11034 |
| right Tuberomammillary nucleus, ventral part           | 0.00164  | 0.63244  | 0.00000 | 0.66333 |
| right uncinata fascicle                                | -0.00363 | -2.01289 | 0.00000 | 0.14393 |
| right Ventral anterior-lateral complex of the thalamus | -0.00937 | -0.90198 | 0.00000 | 0.52988 |
| right Ventral auditory area                            | -0.04317 | -2.34595 | 0.00000 | 0.09253 |
| right Ventral cochlear nucleus                         | -0.02058 | -1.72913 | 0.00000 | 0.21258 |
| right Ventral medial nucleus of the thalamus           | 0.00523  | 0.28895  | 0.00000 | 0.84756 |
| right Ventral part of the lateral geniculate complex   | -0.01158 | -2.08865 | 0.00000 | 0.12998 |
| right Ventral posterolateral nucleus of the thalamus   | -0.00611 | -0.34762 | 0.00000 | 0.81128 |
| right Ventral posteromedial nucleus of the thalamus    | 0.01393  | 0.42567  | 0.00000 | 0.77419 |
| right Ventral premammillary nucleus                    | -0.00132 | -0.41316 | 0.00000 | 0.77967 |
| right ventral spinocerebellar tract                    | -0.00441 | -1.78554 | 0.00000 | 0.19664 |
| right Ventral tegmental area                           | -0.01690 | -2.92223 | 0.00000 | 0.04067 |
| right Ventral tegmental nucleus                        | -0.00015 | -0.30055 | 0.00000 | 0.84043 |
| right Ventrolateral preoptic nucleus                   | -0.00076 | -0.65456 | 0.00000 | 0.65256 |
| right Ventromedial hypothalamic nucleus                | 0.00430  | 0.60677  | 0.00000 | 0.67459 |
| right Ventromedial preoptic nucleus                    | 0.00042  | 0.49960  | 0.00000 | 0.72628 |
| right vestibular nerve                                 | -0.00304 | -0.75181 | 0.00000 | 0.60303 |

|                                          |          |          |         |         |
|------------------------------------------|----------|----------|---------|---------|
| right Vestibulocerebellar nucleus        | -0.00557 | -3.30779 | 0.00000 | 0.02297 |
| right Visceral area                      | -0.04140 | -1.85188 | 0.00000 | 0.17742 |
| right vomeronasal nerve                  | -0.00163 | -3.10785 | 0.00000 | 0.03056 |
| right Xiphoid thalamic nucleus           | -0.00312 | -1.40508 | 0.00000 | 0.31294 |
| right Zona incerta                       | -0.02825 | -1.61565 | 0.00000 | 0.24533 |
| root                                     | -0.09740 | -1.50714 | 0.00000 | 0.27767 |
| Rostral linear nucleus raphe             | -0.00641 | -3.06390 | 0.00000 | 0.03214 |
| Septofimbrial nucleus                    | -0.01650 | -1.74233 | 0.00000 | 0.20952 |
| Subcommissural organ                     | 0.00002  | 0.02339  | 0.00219 | 0.98565 |
| Subfornical organ                        | -0.00141 | -1.29409 | 0.00000 | 0.34834 |
| superior cerebellar peduncle decussation | -0.00424 | -2.66437 | 0.00000 | 0.05759 |
| superior colliculus commissure           | -0.00177 | -2.44262 | 0.00000 | 0.07998 |
| third ventricle                          | -0.05562 | -2.86879 | 0.00000 | 0.04386 |
| Triangular nucleus of septum             | -0.01423 | -1.61436 | 0.00000 | 0.24533 |
| Uvula (IX)                               | -0.35531 | -2.98705 | 0.00000 | 0.03662 |
| Vascular organ of the lamina terminalis  | -0.00009 | -0.17363 | 0.00000 | 0.90458 |
| ventral hippocampal commissure           | -0.00195 | -0.99890 | 0.00000 | 0.48404 |
| ventral tegmental decussation            | -0.00321 | -2.46599 | 0.00000 | 0.07800 |

| region                             | M83+/+: $\Delta$ HET versus M83+/+: $\Delta$ STI1 |                                 |                                        |                                        |
|------------------------------------|---------------------------------------------------|---------------------------------|----------------------------------------|----------------------------------------|
|                                    | beta-<br>M83+/+: $\Delta$ HET                     | tvalue-<br>M83+/+: $\Delta$ HET | pvalue-tvalue-<br>M83+/+: $\Delta$ HET | qvalue-tvalue-<br>M83+/+: $\Delta$ HET |
| anterior commissure                | 0.083254897                                       | 2.680272029                     | 2.21E-08                               | 0.053494483                            |
| arbor vitae                        | 0.471294329                                       | 2.414228748                     | 3.78E-08                               | 0.068891441                            |
| central canal, spinal cord/medulla | NA                                                | NA                              | NA                                     | NA                                     |
| Central linear nucleus raphe       | 0.008292098                                       | 3.057055699                     | 1.36E-08                               | 0.037004667                            |
| cerebellar commissure              | 0.004896383                                       | 1.640753956                     | 2.25E-07                               | 0.178152778                            |
| cerebral aqueduct                  | 0.058181693                                       | 2.098915413                     | 7.62E-08                               | 0.099239787                            |
| corpus callosum                    | 0.943965715                                       | 5.754034721                     | 4.98E-09                               | 0.00893279                             |
| Declive (VI)                       | 0.057984467                                       | 0.496327174                     | 3.19E-05                               | 0.6631472                              |
| doral tegmental decussation        | 0.000926105                                       | 2.58939781                      | 2.61E-08                               | 0.058189844                            |
| dorsal fornix                      | 0.002040882                                       | 1.541465559                     | 2.84E-07                               | 0.203183437                            |
| dorsal hippocampal commissure      | 0.166175858                                       | 4.175379689                     | 6.37E-09                               | 0.016557529                            |
| Edinger-Westphal nucleus           | 0.006285493                                       | 3.847847442                     | 7.37E-09                               | 0.019935335                            |
| fiber tracts                       | 0.13230396                                        | 4.300206191                     | 6.24E-09                               | 0.015563882                            |



|                                             |              |              |          |             |
|---------------------------------------------|--------------|--------------|----------|-------------|
| Folium-tuber vermis (VII)                   | -0.031393295 | -0.540756866 | 2.77E-05 | 0.633168275 |
| fourth ventricle                            | 0.029343889  | 2.119287215  | 6.99E-08 | 0.097332787 |
| habenular commissure                        | 0.003790147  | 2.457434301  | 3.37E-08 | 0.066406347 |
| Hypoglossal nucleus                         | 0.036195283  | 4.575398816  | 5.81E-09 | 0.014437957 |
| Induseum griseum                            | 0.006431335  | 1.35534483   | 5.19E-07 | 0.255594522 |
| inferior colliculus commissure              | 0.000274399  | 0.227422436  | 1.25E-03 | 0.835112546 |
| Interanteromedial nucleus of the thalamus   | 0.004699114  | 2.768464643  | 1.95E-08 | 0.048696787 |
| Interfascicular nucleus raphe               | 0.00374732   | 1.271319161  | 6.80E-07 | 0.283616058 |
| Intermediodorsal nucleus of the thalamus    | 0.00138922   | 0.297614363  | 4.43E-04 | 0.786871673 |
| Interpeduncular nucleus                     | 0.026994186  | 2.420865304  | 3.69E-08 | 0.068622566 |
| left Abducens nucleus                       | -0.000325848 | -0.711729569 | 8.41E-06 | 0.535081763 |
| left Accessory facial motor nucleus         | 0.000428751  | 1.738363254  | 1.72E-07 | 0.157463483 |
| left Accessory olfactory bulb               | 0.001389101  | 0.13841441   | 9.27E-03 | 0.897074418 |
| left Accessory supraoptic group             | 2.57E-05     | 0.183161639  | 2.13E-03 | 0.865888209 |
| left Accessory trigeminal nucleus           | 0.000454481  | 1.033122933  | 2.14E-06 | 0.371367478 |
| left Agranular insular area, dorsal part    | 0.089635212  | 2.017606688  | 9.04E-08 | 0.109292202 |
| left Agranular insular area, posterior part | 0.088288691  | 5.594550609  | 5.02E-09 | 0.009572946 |
| left Agranular insular area, ventral part   | 0.058301686  | 2.591376811  | 2.59E-08 | 0.058159568 |
| left alveus                                 | 0.06879745   | 6.245589288  | 4.89E-09 | 0.00745455  |
| left amygdalar capsule                      | 0.003344253  | 1.439065214  | 3.91E-07 | 0.230707003 |
| left Anterior amygdalar area                | 0.014371697  | 2.050804557  | 8.50E-08 | 0.104962126 |
| left Anterior area                          | 0.066302418  | 2.806546257  | 1.81E-08 | 0.04763306  |
| left Anterior cingulate area                | 0.074260381  | 2.220349125  | 5.51E-08 | 0.086554904 |
| left Anterior cingulate area, ventral part  | 0.052496716  | 2.046705794  | 8.59E-08 | 0.105469342 |
| left Anterior hypothalamic nucleus          | 0.02014271   | 2.524435497  | 2.89E-08 | 0.062511    |
| left Anterior olfactory nucleus             | 0.06065975   | 1.417533716  | 4.33E-07 | 0.23616578  |
| left Anterior pretectal nucleus             | 0.050601281  | 4.509781606  | 5.58E-09 | 0.014437957 |
| left Anterior tegmental nucleus             | 0.002032287  | 3.050768996  | 1.37E-08 | 0.037258334 |
| left Anterodorsal nucleus                   | 0.010058518  | 4.477650691  | 5.49E-09 | 0.014437957 |
| left Anterodorsal preoptic nucleus          | 0.002752579  | 2.934559158  | 1.51E-08 | 0.042556436 |
| left Anterolateral visual area              | 0.023427131  | 1.750272253  | 1.62E-07 | 0.155548595 |
| left Anteromedial nucleus, dorsal part      | 0.016961404  | 4.146245938  | 6.48E-09 | 0.016701326 |
| left Anteromedial nucleus, ventral part     | 0.01131903   | 5.134842816  | 5.12E-09 | 0.012947224 |
| left Anteromedial visual area               | 0.031179003  | 2.478066485  | 3.11E-08 | 0.065256185 |

|                                                            |              |              |          |             |
|------------------------------------------------------------|--------------|--------------|----------|-------------|
| left Anteroventral nucleus of thalamus                     | 0.026188134  | 4.750333243  | 5.44E-09 | 0.014422307 |
| left Anteroventral periventricular nucleus                 | 0.007657487  | 3.478848974  | 9.62E-09 | 0.024827193 |
| left Anteroventral preoptic nucleus                        | 0.003447152  | 2.351306339  | 4.32E-08 | 0.073851424 |
| left Arcuate hypothalamic nucleus                          | 0.003026977  | 0.729343603  | 7.33E-06 | 0.525384014 |
| left Area postrema                                         | 0.001457769  | 0.72116331   | 7.66E-06 | 0.529897882 |
| left Area prostriata                                       | 0.008746568  | 2.019165704  | 9.14E-08 | 0.109292202 |
| left auditory radiation                                    | 0.019919795  | 3.485678369  | 9.53E-09 | 0.024816546 |
| left Barrington's nucleus                                  | -0.000351575 | -1.036884156 | 2.08E-06 | 0.370113031 |
| left Basolateral amygdalar nucleus, anterior part          | 0.019808317  | 2.563814714  | 2.68E-08 | 0.060181163 |
| left Basolateral amygdalar nucleus, posterior part         | 0.018633516  | 2.003850948  | 9.53E-08 | 0.11121241  |
| left Basolateral amygdalar nucleus, ventral part           | 0.005282211  | 1.53331906   | 2.97E-07 | 0.204764514 |
| left Basomedial amygdalar nucleus, anterior part           | 0.015555059  | 1.889454085  | 1.24E-07 | 0.128525639 |
| left Basomedial amygdalar nucleus, posterior part          | 0.014474655  | 2.337910194  | 4.43E-08 | 0.074935727 |
| left Bed nuclei of the stria terminalis                    | 0.055703416  | 3.981981123  | 6.89E-09 | 0.018438655 |
| left Bed nucleus of the accessory olfactory tract          | 0.000480202  | 1.138291636  | 1.24E-06 | 0.329710502 |
| left Bed nucleus of the anterior commissure                | 0.000677426  | 2.208190098  | 5.61E-08 | 0.088005496 |
| left brachium of the inferior colliculus                   | 0.011087531  | 2.6286699    | 2.47E-08 | 0.055588919 |
| left brachium of the superior colliculus                   | 0.006928635  | 2.670280948  | 2.25E-08 | 0.053932371 |
| left Caudoputamen                                          | 0.8151537    | 3.234036321  | 1.19E-08 | 0.030463735 |
| left Central amygdalar nucleus                             | 0.039916767  | 3.293485677  | 1.09E-08 | 0.029802285 |
| left Central lateral nucleus of the thalamus               | 0.016001025  | 2.544886047  | 2.77E-08 | 0.061334326 |
| left Central medial nucleus of the thalamus                | 0.005925394  | 1.720070534  | 1.84E-07 | 0.160794084 |
| left cerebral peduncle                                     | 0.021754773  | 1.855539628  | 1.33E-07 | 0.134586411 |
| left choroid plexus                                        | 0.030355658  | 1.781623259  | 1.52E-07 | 0.149056978 |
| left cingulum bundle                                       | 0.063815498  | 5.98099854   | 4.95E-09 | 0.008786948 |
| left Claustrum                                             | 0.017021492  | 3.637320144  | 8.69E-09 | 0.0216394   |
| left columns of the fornix                                 | 0.013728629  | 4.408857232  | 5.65E-09 | 0.014437957 |
| left commissural branch of stria terminalis                | 0.000823206  | 2.423286346  | 3.66E-08 | 0.068508705 |
| left Copula pyramidis                                      | 0.032756897  | 0.706317183  | 9.24E-06 | 0.537003555 |
| left Cortical amygdalar area, anterior part                | 0.010358577  | 1.069328605  | 1.75E-06 | 0.356429486 |
| left Cortical amygdalar area, posterior part, lateral zone | 0.028760556  | 2.16505266   | 6.25E-08 | 0.092320043 |
| left Cortical amygdalar area, posterior part, medial zone  | 0.037575742  | 3.653146007  | 8.49E-09 | 0.021637953 |
| left Cortical subplate                                     | 0.006422726  | 2.672082578  | 2.24E-08 | 0.053932371 |
| left corticospinal tract                                   | 0.004527625  | 2.439648032  | 3.42E-08 | 0.067403702 |

|                                                           |              |              |          |             |
|-----------------------------------------------------------|--------------|--------------|----------|-------------|
| left crossed tectospinal pathway                          | 0.022998294  | 3.753036743  | 7.74E-09 | 0.02076658  |
| left Crus 1                                               | 0.109127044  | 1.105040858  | 1.53E-06 | 0.342031984 |
| left Crus 2                                               | -0.000333901 | -0.004668228 | 1.39E-01 | 0.996358892 |
| left cuneate fascicle                                     | 0.000531651  | 0.850968363  | 4.83E-06 | 0.457488619 |
| left Cuneate nucleus                                      | 0.008326411  | 1.086913322  | 1.61E-06 | 0.349841353 |
| left Cuneiform nucleus                                    | 0.020991755  | 2.493978013  | 3.04E-08 | 0.064688366 |
| left Dentate gyrus                                        | 0.236550385  | 3.242609146  | 1.14E-08 | 0.03032609  |
| left Dentate nucleus                                      | 0.00398744   | 0.819823474  | 5.44E-06 | 0.474049718 |
| left Diagonal band nucleus                                | 0.026145233  | 2.844032229  | 1.71E-08 | 0.046045082 |
| left dorsal acoustic stria                                | -2.57E-05    | -0.047142736 | 1.54E-02 | 0.967012063 |
| left Dorsal auditory area                                 | 0.040294248  | 2.356160584  | 4.22E-08 | 0.073470476 |
| left Dorsal cochlear nucleus                              | 0.004047437  | 0.33423693   | 1.59E-04 | 0.765991453 |
| left dorsal limb                                          | 0.006011096  | 1.303068221  | 6.16E-07 | 0.272632202 |
| left Dorsal motor nucleus of the vagus nerve              | 0.010375798  | 3.91421238   | 7.11E-09 | 0.019764937 |
| left Dorsal nucleus raphe                                 | 0.002795467  | 1.367203811  | 5.00E-07 | 0.251832352 |
| left Dorsal part of the lateral geniculate complex        | 0.021917864  | 2.203059638  | 5.66E-08 | 0.088393232 |
| left Dorsal peduncular area                               | 0.013034013  | 1.439442313  | 3.84E-07 | 0.230707003 |
| left Dorsal premammillary nucleus                         | 0.00521361   | 2.631828612  | 2.45E-08 | 0.055447069 |
| left dorsal spinocerebellar tract                         | 0.001843623  | 1.652934952  | 2.13E-07 | 0.175904926 |
| left Dorsal tegmental nucleus                             | 0.00462193   | 3.271904988  | 1.11E-08 | 0.030151432 |
| left Dorsal terminal nucleus of the accessory optic tract | 0.000900374  | 2.549673787  | 2.74E-08 | 0.061153979 |
| left Dorsomedial nucleus of the hypothalamus              | 0.009303932  | 2.311850384  | 4.61E-08 | 0.077497743 |
| left Ectorhinal area                                      | 0.072682213  | 3.983753215  | 6.92E-09 | 0.018438655 |
| left Endopiriform nucleus, dorsal part                    | 0.049649533  | 3.06997316   | 1.33E-08 | 0.036804518 |
| left Endopiriform nucleus, ventral part                   | 0.019431011  | 2.480933218  | 3.15E-08 | 0.065256185 |
| left Entorhinal area, lateral part                        | 0.185709942  | 3.728894521  | 7.78E-09 | 0.02076658  |
| left Entorhinal area, medial part, dorsal zone            | 0.148150732  | 2.660223538  | 2.30E-08 | 0.054212512 |
| left Ethmoid nucleus of the thalamus                      | 0.010521581  | 4.127059424  | 6.60E-09 | 0.016711482 |
| left external capsule                                     | 0.034325878  | 7.932888373  | 4.83E-09 | 0.00272439  |
| left External cuneate nucleus                             | 0.001200515  | 0.496140938  | 2.97E-05 | 0.6631472   |
| left external medullary lamina of the thalamus            | 0.003652957  | 3.175379903  | 1.24E-08 | 0.032389702 |
| left Facial motor nucleus                                 | 0.023058338  | 2.453017503  | 3.39E-08 | 0.066747867 |
| left facial nerve                                         | 0.001860786  | 1.617533373  | 2.31E-07 | 0.18432499  |
| left fasciculus retroflexus                               | 0.006611364  | 3.608107035  | 8.86E-09 | 0.022251122 |

|                                                                |             |             |          |             |
|----------------------------------------------------------------|-------------|-------------|----------|-------------|
| left Fasciola cinerea                                          | 0.001320578 | 0.781861841 | 6.42E-06 | 0.494464533 |
| left Fastigial nucleus                                         | 0.019293897 | 2.485012681 | 3.18E-08 | 0.065256185 |
| left Field CA1                                                 | 0.474851026 | 7.533972541 | 4.85E-09 | 0.002952701 |
| left Field CA2                                                 | 0.021308968 | 4.066109219 | 6.68E-09 | 0.017198719 |
| left Field CA3                                                 | 0.272351647 | 5.055375844 | 5.06E-09 | 0.012947224 |
| left Fields of Forel                                           | 0.00926107  | 3.64214098  | 8.53E-09 | 0.021637953 |
| left fimbria                                                   | 0.061688716 | 3.452671245 | 9.67E-09 | 0.025838207 |
| left Flocculus                                                 | 0.008583797 | 0.443146212 | 4.34E-05 | 0.697975067 |
| left Frontal pole                                              | 0.017390221 | 2.095629997 | 7.47E-08 | 0.099239787 |
| left Fundus of striatum                                        | 0.010941672 | 1.450458032 | 3.78E-07 | 0.227411353 |
| left Gigantocellular reticular nucleus                         | 0.083409494 | 2.665545052 | 2.28E-08 | 0.054042913 |
| left Globus pallidus, external segment                         | 0.050481339 | 2.854343556 | 1.68E-08 | 0.045717165 |
| left Globus pallidus, internal segment                         | 0.014714758 | 2.619000796 | 2.50E-08 | 0.056210341 |
| left Gracile nucleus                                           | 0.003455744 | 1.916101152 | 1.18E-07 | 0.124062713 |
| left Gustatory areas                                           | 0.047643162 | 2.826151419 | 1.75E-08 | 0.046778579 |
| left Hippocampal formation                                     | 0.018779333 | 4.632365861 | 5.76E-09 | 0.014437957 |
| left Hippocampo-amygdalar transition area                      | 0.013917248 | 3.310780478 | 1.06E-08 | 0.029540377 |
| left inferior cerebellar peduncle                              | 0.022783922 | 2.725113512 | 2.07E-08 | 0.050986133 |
| left Inferior colliculus                                       | 0.143838392 | 2.197388202 | 5.81E-08 | 0.088859216 |
| left Inferior olivary complex                                  | 0.012733872 | 1.281288766 | 6.40E-07 | 0.280775875 |
| left Inferior salivatory nucleus                               | 0.0008918   | 2.480010113 | 3.09E-08 | 0.065256185 |
| left Infracerebellar nucleus                                   | 0.003858784 | 2.283527634 | 4.81E-08 | 0.080320733 |
| left Infralimbic area                                          | 0.015478076 | 1.32232323  | 5.59E-07 | 0.267189837 |
| left Interanterodorsal nucleus of the thalamus                 | 0.006962921 | 5.087651688 | 5.14E-09 | 0.012947224 |
| left Intercalated amygdalar nucleus                            | 0.003258533 | 1.232719738 | 8.21E-07 | 0.296050889 |
| left Intergeniculate leaflet of the lateral geniculate complex | 0.000746032 | 0.653712794 | 1.32E-05 | 0.565661336 |
| left Intermediate geniculate nucleus                           | 0.000480207 | 1.185567189 | 9.37E-07 | 0.314232788 |
| left Intermediate reticular nucleus                            | 0.105061426 | 2.802166132 | 1.82E-08 | 0.047643948 |
| left internal capsule                                          | 0.125847029 | 4.394667359 | 5.46E-09 | 0.014437957 |
| left Interposed nucleus                                        | 0.03433444  | 2.77975205  | 1.91E-08 | 0.04822422  |
| left Interstitial nucleus of Cajal                             | 0.00416747  | 4.37816005  | 5.51E-09 | 0.014437957 |
| left Intertrigeminal nucleus                                   | 0.001492063 | 1.408770315 | 4.41E-07 | 0.238991456 |
| left Koelliker-Fuse subnucleus                                 | 0.007580344 | 2.569890727 | 2.64E-08 | 0.059888677 |
| left Lateral amygdalar nucleus                                 | 0.024644589 | 1.531681156 | 3.02E-07 | 0.204943199 |

|                                                            |             |             |          |             |
|------------------------------------------------------------|-------------|-------------|----------|-------------|
| left Lateral dorsal nucleus of thalamus                    | 0.057881495 | 3.769226168 | 7.60E-09 | 0.02076658  |
| left Lateral habenula                                      | 0.010667294 | 1.541627161 | 2.80E-07 | 0.203183437 |
| left Lateral hypothalamic area                             | 0.078581589 | 3.303498854 | 1.07E-08 | 0.029597394 |
| left lateral lemniscus                                     | 0.014997879 | 1.49796207  | 3.48E-07 | 0.212870413 |
| left Lateral mammillary nucleus                            | 0.0018779   | 0.628268952 | 1.57E-05 | 0.579531355 |
| left lateral olfactory tract, body                         | 0.012399448 | 0.943098552 | 3.59E-06 | 0.409491468 |
| left Lateral posterior nucleus of the thalamus             | 0.047402804 | 2.769151776 | 1.93E-08 | 0.048696787 |
| left Lateral preoptic area                                 | 0.021729054 | 2.790880453 | 1.87E-08 | 0.047944415 |
| left lateral recess                                        | 0.006285536 | 1.219473843 | 8.57E-07 | 0.300454124 |
| left Lateral reticular nucleus, magnocellular part         | 0.010067168 | 1.609361662 | 2.38E-07 | 0.186110545 |
| left Lateral reticular nucleus, parvicellular part         | 0.001372004 | 1.734512774 | 1.74E-07 | 0.158174243 |
| left Lateral septal nucleus, caudal (caudodorsal) part     | 0.024078709 | 3.493892448 | 9.30E-09 | 0.024715094 |
| left Lateral septal nucleus, rostral (rostroventral) part  | 0.097455259 | 3.399783206 | 1.01E-08 | 0.026865674 |
| left Lateral septal nucleus, ventral part                  | 0.031427526 | 3.445848135 | 9.72E-09 | 0.02587069  |
| left Lateral terminal nucleus of the accessory optic tract | 0.000754607 | 2.234776668 | 5.32E-08 | 0.08518895  |
| left lateral ventricle                                     | 0.098750022 | 3.557870387 | 9.08E-09 | 0.022894006 |
| left Lateral vestibular nucleus                            | 0.008146325 | 2.303767043 | 4.65E-08 | 0.078416532 |
| left Lateral visual area                                   | 0.042189409 | 1.988320315 | 1.00E-07 | 0.11304932  |
| left Laterodorsal tegmental nucleus                        | 0.006448431 | 3.311725293 | 1.06E-08 | 0.029540377 |
| left Laterointermediate area                               | 0.017767601 | 2.145740504 | 6.42E-08 | 0.094782105 |
| left Linear nucleus of the medulla                         | 0.0026497   | 2.095295013 | 7.55E-08 | 0.099239787 |
| left Lingula (l)                                           | 0.004261807 | 1.503735747 | 3.37E-07 | 0.21165983  |
| left Locus ceruleus                                        | 0.000343002 | 0.705515372 | 8.81E-06 | 0.537003555 |
| left Magnocellular nucleus                                 | 0.008712166 | 1.201971778 | 8.96E-07 | 0.307772714 |
| left Magnocellular reticular nucleus                       | 0.022758166 | 3.586610192 | 8.99E-09 | 0.022514101 |
| left Main olfactory bulb                                   | 0.275282886 | 1.236753427 | 8.04E-07 | 0.294760033 |
| left mammillary peduncle                                   | 0.001114755 | 1.516195869 | 3.21E-07 | 0.208598021 |
| left mammillotegmental tract                               | 0.001972251 | 1.320743206 | 5.49E-07 | 0.267189837 |
| left mammillothalamic tract                                | 0.007700389 | 3.670203549 | 8.45E-09 | 0.021353414 |
| left Medial accesory oculomotor nucleus                    | 0.00118336  | 1.258663644 | 6.94E-07 | 0.288545797 |
| left Medial amygdalar nucleus                              | 0.052084685 | 3.772289072 | 7.64E-09 | 0.02076658  |
| left medial corticohypothalamic tract                      | 0.000145774 | 0.432530622 | 5.13E-05 | 0.703879775 |
| left medial forebrain bundle                               | 0.00181791  | 2.084395273 | 7.85E-08 | 0.100528865 |
| left Medial geniculate complex, dorsal part                | 0.003052734 | 1.930620046 | 1.13E-07 | 0.121827234 |

|                                                           |             |             |          |             |
|-----------------------------------------------------------|-------------|-------------|----------|-------------|
| left Medial geniculate complex, medial part               | 0.005993974 | 2.192466074 | 5.92E-08 | 0.089216861 |
| left Medial geniculate complex, ventral part              | 0.008180626 | 2.368901701 | 4.18E-08 | 0.072197732 |
| left Medial habenula                                      | 0.012896801 | 1.758283232 | 1.60E-07 | 0.154074846 |
| left medial lemniscus                                     | 0.026822792 | 4.44048447  | 5.69E-09 | 0.014437957 |
| left medial longitudinal fascicle                         | 0.003850198 | 2.989828355 | 1.46E-08 | 0.039632355 |
| left Medial mammillary nucleus                            | 0.020957284 | 1.938838866 | 1.11E-07 | 0.120797167 |
| left Medial preoptic area                                 | 0.02018559  | 3.009250534 | 1.42E-08 | 0.038766796 |
| left Medial preoptic nucleus                              | 0.016601262 | 5.624793696 | 5.04E-09 | 0.009572946 |
| left Medial pretectal area                                | 0.00198083  | 3.686118471 | 8.30E-09 | 0.021285691 |
| left Medial terminal nucleus of the accessory optic tract | 0.001191944 | 1.422239144 | 4.19E-07 | 0.235233971 |
| left Medial vestibular nucleus                            | 0.045936688 | 1.971370351 | 1.06E-07 | 0.115201866 |
| left Mediodorsal nucleus of thalamus                      | 0.042009121 | 3.207365375 | 1.22E-08 | 0.031040175 |
| left Medullary reticular nucleus, dorsal part             | 0.054803172 | 3.367649915 | 1.02E-08 | 0.028089985 |
| left Medullary reticular nucleus, ventral part            | 0.049769638 | 2.917306493 | 1.56E-08 | 0.042662245 |
| left Midbrain reticular nucleus                           | 0.201805366 | 4.124582286 | 6.54E-09 | 0.016711482 |
| left Midbrain reticular nucleus, retrorubral area         | 0.006697109 | 4.245246972 | 6.19E-09 | 0.015563882 |
| left Midbrain trigeminal nucleus                          | 0.000360149 | 1.239184405 | 7.87E-07 | 0.294169272 |
| left middle cerebellar peduncle                           | 0.017853297 | 1.673072491 | 2.02E-07 | 0.171473409 |
| left Motor nucleus of trigeminal                          | 0.01472337  | 2.249784356 | 5.28E-08 | 0.083173148 |
| left motor root of the trigeminal nerve                   | 0.001946526 | 1.840783379 | 1.41E-07 | 0.136834053 |
| left nigrostriatal tract                                  | 0.005170754 | 4.500589778 | 5.53E-09 | 0.014437957 |
| left Nucleus accumbens                                    | 0.095543044 | 2.458541324 | 3.34E-08 | 0.066406347 |
| left Nucleus ambiguus, dorsal division                    | 0.000394455 | 0.572218444 | 2.26E-05 | 0.613752332 |
| left Nucleus ambiguus, ventral division                   | 0.000823216 | 1.04897339  | 2.02E-06 | 0.364502567 |
| left Nucleus incertus                                     | 0.002118029 | 1.47316531  | 3.66E-07 | 0.220215182 |
| left Nucleus of Darkschewitsch                            | 0.005239334 | 4.022509512 | 6.83E-09 | 0.017974086 |
| left Nucleus of reuniens                                  | 0.024576019 | 4.390972067 | 5.55E-09 | 0.014437957 |
| left Nucleus of Roller                                    | 0.001552086 | 2.53227271  | 2.83E-08 | 0.062001701 |
| left Nucleus of the brachium of the inferior colliculus   | 0.001877939 | 1.150780502 | 1.16E-06 | 0.325852718 |
| left Nucleus of the lateral lemniscus                     | 0.0114821   | 1.123936664 | 1.41E-06 | 0.334491533 |
| left Nucleus of the lateral olfactory tract               | 0.008026202 | 2.186141395 | 6.03E-08 | 0.089593356 |
| left Nucleus of the optic tract                           | 0.008506433 | 3.323329867 | 1.05E-08 | 0.029377148 |
| left Nucleus of the posterior commissure                  | 0.008497842 | 3.01134687  | 1.43E-08 | 0.038766796 |
| left Nucleus of the solitary tract                        | 0.035586447 | 3.848722061 | 7.27E-09 | 0.019935335 |

|                                                          |             |             |          |             |
|----------------------------------------------------------|-------------|-------------|----------|-------------|
| left Nucleus of the trapezoid body                       | 0.003773025 | 2.221411836 | 5.46E-08 | 0.086554904 |
| left Nucleus prepositus                                  | 0.004587655 | 1.549336678 | 2.76E-07 | 0.201351572 |
| left Nucleus sagulum                                     | 0.00162926  | 1.900137154 | 1.23E-07 | 0.126719281 |
| left Nucleus x                                           | 0.002092314 | 3.890933288 | 7.08E-09 | 0.019764937 |
| left Nucleus y                                           | 0.000814629 | 1.728806767 | 1.77E-07 | 0.159375338 |
| left oculomotor nerve                                    | 0.000240103 | 1.138308573 | 1.28E-06 | 0.329710502 |
| left Oculomotor nucleus                                  | 0.00155208  | 3.144889179 | 1.25E-08 | 0.033909936 |
| left olfactory nerve layer of main olfactory bulb        | 0.039848273 | 1.072469822 | 1.70E-06 | 0.355935273 |
| left Olfactory tubercle                                  | 0.034196856 | 0.579052178 | 2.12E-05 | 0.609861289 |
| left Olivary pretectal nucleus                           | 0.002658269 | 3.01590573  | 1.41E-08 | 0.038645663 |
| left optic nerve                                         | 0.001286256 | 0.737309079 | 7.01E-06 | 0.521027153 |
| left optic radiation                                     | 0.135305225 | 5.084285062 | 5.21E-09 | 0.012947224 |
| left optic tract                                         | 0.027097007 | 2.657406667 | 2.33E-08 | 0.054310458 |
| left Orbital area, lateral part                          | 0.054563282 | 2.200363649 | 5.76E-08 | 0.08860188  |
| left Orbital area, medial part                           | 0.023478592 | 1.836189944 | 1.43E-07 | 0.137629255 |
| left Orbital area, ventrolateral part                    | 0.029901458 | 1.575111197 | 2.56E-07 | 0.194922641 |
| left Parabigeminal nucleus                               | 0.00072888  | 1.143453273 | 1.21E-06 | 0.328286977 |
| left Parabrachial nucleus                                | 0.039788229 | 2.861199123 | 1.66E-08 | 0.045446122 |
| left Paracentral nucleus                                 | 0.015066384 | 3.233003835 | 1.20E-08 | 0.030463735 |
| left Parafascicular nucleus                              | 0.027508792 | 2.921259345 | 1.55E-08 | 0.042662245 |
| left Paraflocculus                                       | 0.060145999 | 0.948805701 | 3.47E-06 | 0.407560128 |
| left Paragigantocellular reticular nucleus, dorsal part  | 0.005333677 | 1.24304889  | 7.38E-07 | 0.293120038 |
| left Paragigantocellular reticular nucleus, lateral part | 0.02370148  | 3.028552311 | 1.38E-08 | 0.038597388 |
| left Paramedian lobule                                   | 0.032860097 | 0.462847512 | 4.01E-05 | 0.684498052 |
| left Paranigral nucleus                                  | 0.000986131 | 1.649031015 | 2.19E-07 | 0.176403981 |
| left Parapyramidal nucleus                               | 0.002306705 | 1.536880923 | 2.93E-07 | 0.20396117  |
| left Parasolitary nucleus                                | 0.000222956 | 0.261754708 | 7.89E-04 | 0.810985892 |
| left Parastrial nucleus                                  | 0.003524331 | 3.650692413 | 8.57E-09 | 0.021637953 |
| left Parasubiculum                                       | 0.023804327 | 2.044680721 | 8.68E-08 | 0.105469342 |
| left Parasubthalamic nucleus                             | 0.005805307 | 2.969146111 | 1.46E-08 | 0.040783876 |
| left Parataenial nucleus                                 | 0.007151564 | 2.383133879 | 4.08E-08 | 0.070940536 |
| left Paratrigeminal nucleus                              | 0.001303426 | 0.739866943 | 6.71E-06 | 0.520133846 |
| left Paratrochlear nucleus                               | 0.000591681 | 1.166046092 | 1.05E-06 | 0.320740509 |
| left Paraventricular hypothalamic nucleus                | 0.01743303  | 3.620360199 | 8.74E-09 | 0.022103493 |

|                                                 |             |             |          |             |
|-------------------------------------------------|-------------|-------------|----------|-------------|
| left Paraventricular nucleus of the thalamus    | 0.008849333 | 1.160365048 | 1.08E-06 | 0.322880505 |
| left Parvicellular motor 5 nucleus              | 0.001843653 | 0.992895841 | 3.02E-06 | 0.386241787 |
| left Parvicellular reticular nucleus            | 0.080819893 | 3.500740154 | 9.34E-09 | 0.024715094 |
| left Pedunclopontine nucleus                    | 0.041614663 | 4.281776651 | 6.21E-09 | 0.015563882 |
| left Perifornical nucleus                       | 0.007597488 | 3.493072124 | 9.43E-09 | 0.024715094 |
| left Peripeduncular nucleus                     | 0.00339571  | 5.902767564 | 4.96E-09 | 0.008786948 |
| left Perireunensis nucleus                      | 0.008060537 | 4.965970037 | 5.10E-09 | 0.012947224 |
| left Perirhinal area                            | 0.029017984 | 3.439623494 | 9.76E-09 | 0.02587069  |
| left Peritrigeminal zone                        | 0.01134478  | 2.483466809 | 3.20E-08 | 0.065256185 |
| left Periventricular hypothalamic nucleus       | 0.023941516 | 4.252678176 | 6.16E-09 | 0.015563882 |
| left Piriform area                              | 0.277745047 | 2.440571184 | 3.45E-08 | 0.067403702 |
| left Piriform-amygdalar area                    | 0.015229173 | 1.105905354 | 1.49E-06 | 0.342031984 |
| left Pontine central gray                       | 0.01345423  | 2.085028563 | 7.93E-08 | 0.100528865 |
| left Pontine gray                               | 0.01582946  | 1.006349325 | 2.65E-06 | 0.381262894 |
| left Pontine reticular nucleus                  | 0.08696825  | 2.917958328 | 1.53E-08 | 0.042662245 |
| left Pontine reticular nucleus, caudal part     | 0.066199608 | 2.276161308 | 4.89E-08 | 0.080934447 |
| left Posterior amygdalar nucleus                | 0.03210492  | 4.416234257 | 5.72E-09 | 0.014437957 |
| left Posterior auditory area                    | 0.01897666  | 1.928798933 | 1.12E-07 | 0.121827234 |
| left Posterior complex of the thalamus          | 0.064853166 | 2.944168772 | 1.49E-08 | 0.042295696 |
| left Posterior hypothalamic nucleus             | 0.034145931 | 2.713194933 | 2.11E-08 | 0.051367794 |
| left Posterior intralaminar thalamic nucleus    | 0.006405576 | 2.503281773 | 3.00E-08 | 0.063987985 |
| left Posterior limiting nucleus of the thalamus | 0.006782848 | 3.676350428 | 8.33E-09 | 0.021285691 |
| left Posterior pretectal nucleus                | 0.004570494 | 3.065048899 | 1.33E-08 | 0.036804518 |
| left Posterior triangular thalamic nucleus      | 0.007914774 | 3.071870057 | 1.34E-08 | 0.036804518 |
| left Posterodorsal preoptic nucleus             | 0.000188652 | 0.623917907 | 1.76E-05 | 0.581662193 |
| left Posterodorsal tegmental nucleus            | 0.001054723 | 0.99743772  | 2.83E-06 | 0.384986327 |
| left Posterolateral visual area                 | 0.019508349 | 1.670249219 | 2.04E-07 | 0.17195344  |
| left posteromedial visual area                  | 0.042240914 | 1.994328206 | 9.73E-08 | 0.112349479 |
| left Postpiriform transition area               | 0.02837468  | 1.597497431 | 2.45E-07 | 0.189033405 |
| left Postrhinal area                            | 0.034977847 | 1.743277331 | 1.68E-07 | 0.156529958 |
| left Postsubiculum                              | 0.045447776 | 3.43804976  | 9.81E-09 | 0.02587069  |
| left Precommissural nucleus                     | 0.00353289  | 1.137123441 | 1.31E-06 | 0.329756764 |
| left Prelimbic area                             | 0.055369328 | 2.675699421 | 2.22E-08 | 0.053758659 |
| left Preparasubthalamic nucleus                 | 0.00018007  | 0.34565348  | 1.40E-04 | 0.758788166 |



|                                                        |              |              |          |             |
|--------------------------------------------------------|--------------|--------------|----------|-------------|
| left Presubiculum                                      | 0.02563075   | 2.062211997  | 8.25E-08 | 0.103571032 |
| left Primary auditory area                             | 0.070101136  | 2.916795706  | 1.54E-08 | 0.042662245 |
| left Primary motor area                                | 0.217155739  | 2.121242051  | 6.92E-08 | 0.097216494 |
| left Primary somatosensory area, barrel field          | 0.199884942  | 2.386525177  | 4.05E-08 | 0.070695869 |
| left Primary somatosensory area, lower limb            | 0.07416575   | 3.492165671  | 9.39E-09 | 0.024715094 |
| left Primary somatosensory area, mouth                 | 0.127940224  | 2.115098824  | 7.06E-08 | 0.097427205 |
| left Primary somatosensory area, nose                  | 0.08036565   | 2.132309933  | 6.73E-08 | 0.095999744 |
| left Primary somatosensory area, trunk                 | 0.059133624  | 3.256831051  | 1.15E-08 | 0.03032609  |
| left Primary somatosensory area, unassigned            | 0.036769872  | 2.396684004  | 3.99E-08 | 0.069792108 |
| left Primary somatosensory area, upper limb            | 0.097987277  | 2.528589261  | 2.87E-08 | 0.062229558 |
| left Primary visual area                               | 0.251095545  | 1.956556582  | 1.08E-07 | 0.117677041 |
| left principal mammillary tract                        | 0.001209081  | 2.16075684   | 6.31E-08 | 0.092804169 |
| left Principal sensory nucleus of the trigeminal       | 0.028906635  | 1.550087632  | 2.72E-07 | 0.201351572 |
| left Prosubiculum                                      | 0.062186158  | 5.138441098  | 5.17E-09 | 0.012947224 |
| left pyramid                                           | 0.005419395  | 1.019138778  | 2.42E-06 | 0.376477268 |
| left Red nucleus                                       | 0.028880813  | 3.224943962  | 1.18E-08 | 0.030463735 |
| left Reticular nucleus of the thalamus                 | 0.084429635  | 3.560690683  | 9.12E-09 | 0.022894006 |
| left Retrochiasmatic area                              | 0.003575788  | 1.334669929  | 5.28E-07 | 0.262897452 |
| left Retroparafascicular nucleus                       | 0.002744018  | 2.723744088  | 2.08E-08 | 0.050986133 |
| left Retrosplenial area, dorsal part                   | 0.105533486  | 2.466159969  | 3.27E-08 | 0.066102521 |
| left Retrosplenial area, lateral agranular part        | 0.091693183  | 3.088139027  | 1.29E-08 | 0.036160924 |
| left Retrosplenial area, ventral part                  | 0.08068312   | 1.654642765  | 2.10E-07 | 0.175748266 |
| left Rostrolateral area                                | 0.041546118  | 2.859788802  | 1.67E-08 | 0.045446122 |
| left rubrospinal tract                                 | 0.0129912    | 3.560020592  | 9.16E-09 | 0.022894006 |
| left Secondary motor area                              | 0.18503374   | 1.662637964  | 2.07E-07 | 0.17378736  |
| left sensory root of the trigeminal nerve              | 0.01711583   | 3.870803265  | 7.23E-09 | 0.019935335 |
| left Septohippocampal nucleus                          | 0.00227239   | 2.478207776  | 3.13E-08 | 0.065256185 |
| left Simple lobule                                     | 0.014638925  | 0.166773542  | 4.08E-03 | 0.877411362 |
| left solitary tract                                    | -0.000351576 | -1.365361549 | 5.09E-07 | 0.252128176 |
| left Spinal nucleus of the trigeminal, caudal part     | 0.04858636   | 2.644070718  | 2.39E-08 | 0.054589968 |
| left Spinal nucleus of the trigeminal, interpolar part | 0.047977631  | 2.331929059  | 4.50E-08 | 0.075357084 |
| left Spinal nucleus of the trigeminal, oral part       | 0.035920907  | 3.223358056  | 1.18E-08 | 0.030463735 |
| left spinal tract of the trigeminal nerve              | 0.053937091  | 4.356053747  | 5.74E-09 | 0.014437957 |
| left Spinal vestibular nucleus                         | 0.015735351  | 1.482862155  | 3.54E-07 | 0.217623814 |

|                                                   |              |              |          |             |
|---------------------------------------------------|--------------|--------------|----------|-------------|
| left stria medullaris                             | 0.015632271  | 3.728480134  | 7.71E-09 | 0.02076658  |
| left stria terminalis                             | 0.015186342  | 2.796900695  | 1.85E-08 | 0.047720246 |
| left Subceruleus nucleus                          | 0.00052308   | 1.03086667   | 2.27E-06 | 0.371541591 |
| left subependymal zone                            | 0.007991947  | 3.601189656  | 8.82E-09 | 0.022251122 |
| left Subgeniculate nucleus                        | 0.001114755  | 1.976575409  | 1.04E-07 | 0.114643484 |
| left Subiculum                                    | 0.117726635  | 4.87599413   | 5.38E-09 | 0.013010395 |
| left Sublaterodorsal nucleus                      | -0.000385877 | -0.378572909 | 1.11E-04 | 0.73610943  |
| left Submedial nucleus of the thalamus            | 0.02364998   | 4.423253959  | 5.60E-09 | 0.014437957 |
| left Subparafascicular area                       | 0.006971506  | 2.755454472  | 1.98E-08 | 0.049162557 |
| left Subparafascicular nucleus                    | 0.012510997  | 4.709691384  | 5.62E-09 | 0.014437957 |
| left Subparaventricular zone                      | 0.003833033  | 1.941965114  | 1.10E-07 | 0.120396732 |
| left Substantia innominata                        | 0.080030473  | 2.04263274   | 8.86E-08 | 0.105562555 |
| left Substantia nigra, compact part               | 0.002581129  | 0.798216942  | 6.16E-06 | 0.485107678 |
| left Substantia nigra, reticular part             | 0.025819693  | 1.245130526  | 7.23E-07 | 0.293120038 |
| left Subthalamic nucleus                          | 0.007631776  | 3.893455874  | 7.04E-09 | 0.019764937 |
| left Superior central nucleus raphe               | 0.023752937  | 2.489770095  | 3.06E-08 | 0.064990771 |
| left superior cerebellar peduncles                | 0.028820721  | 3.305606188  | 1.08E-08 | 0.029597394 |
| left Superior colliculus                          | 0.188857316  | 1.982562547  | 1.02E-07 | 0.113936592 |
| left Superior olivary complex, lateral part       | 0.010573035  | 2.348986246  | 4.28E-08 | 0.073851424 |
| left Superior olivary complex, medial part        | 0.004467608  | 2.376152735  | 4.15E-08 | 0.071458628 |
| left Superior olivary complex, periolivary region | 0.005650969  | 1.057278023  | 1.90E-06 | 0.361393495 |
| left Superior vestibular nucleus                  | 0.009792738  | 1.72641922   | 1.79E-07 | 0.159708478 |
| left Supplemental somatosensory area              | 0.248934834  | 2.418480766  | 3.72E-08 | 0.068732612 |
| left supra-callosal cerebral white matter         | 0.05445151   | 5.053207208  | 5.19E-09 | 0.012947224 |
| left Suprachiasmatic nucleus                      | 0.001157632  | 1.153201185  | 1.13E-06 | 0.325221861 |
| left Suprageniculate nucleus                      | 0.006182621  | 2.817589534  | 1.79E-08 | 0.047042216 |
| left Supragenua nucleus                           | 0.000265825  | 0.686966306  | 1.13E-05 | 0.546040543 |
| left Supramammillary nucleus                      | 0.009175268  | 3.273420706  | 1.11E-08 | 0.030151432 |
| left Supraoculomotor periaqueductal gray          | 0.001526351  | 3.003343783  | 1.44E-08 | 0.039012888 |
| left supraoptic commissures                       | 0.000994702  | 2.270778201  | 5.01E-08 | 0.081313203 |
| left Supraoptic nucleus                           | 0.000403025  | 0.702500838  | 9.71E-06 | 0.538202995 |
| left Supratrigeminal nucleus                      | 0.010538708  | 2.403797236  | 3.80E-08 | 0.069587455 |
| left Taenia tecta, dorsal part                    | 0.01564937   | 1.279235412  | 6.53E-07 | 0.281186081 |
| left Taenia tecta, ventral part                   | 0.000274378  | 0.024714568  | 2.80E-02 | 0.983279256 |

|                                                       |              |              |          |             |
|-------------------------------------------------------|--------------|--------------|----------|-------------|
| left Tegmental reticular nucleus                      | 0.027748923  | 2.642863989  | 2.40E-08 | 0.054589968 |
| left Temporal association areas                       | 0.109821018  | 2.835425763  | 1.73E-08 | 0.04641185  |
| left trapezoid body                                   | 0.004544733  | 1.27178094   | 6.67E-07 | 0.283616058 |
| left trochlear nerve                                  | 0.000300127  | 1.418720338  | 4.26E-07 | 0.236125601 |
| left Trochlear nucleus                                | -0.000171504 | -0.57049003  | 2.42E-05 | 0.614106174 |
| left Tuberal nucleus                                  | 0.006851408  | 0.710812376  | 8.02E-06 | 0.535081763 |
| left Tuberomammillary nucleus, dorsal part            | -0.00020579  | -0.369564884 | 1.25E-04 | 0.741845103 |
| left Tuberomammillary nucleus, ventral part           | 0.001569222  | 0.638285655  | 1.48E-05 | 0.574394113 |
| left uncinata fascicle                                | 0.003532924  | 2.253956392  | 5.10E-08 | 0.083049896 |
| left Ventral anterior-lateral complex of the thalamus | 0.048637628  | 3.747118605  | 7.67E-09 | 0.02076658  |
| left Ventral auditory area                            | 0.069792406  | 4.115214091  | 6.57E-09 | 0.016711482 |
| left Ventral cochlear nucleus                         | 0.012699746  | 1.013703365  | 2.49E-06 | 0.378443378 |
| left Ventral medial nucleus of the thalamus           | 0.078392973  | 4.416822993  | 5.67E-09 | 0.014437957 |
| left Ventral part of the lateral geniculate complex   | 0.011756387  | 2.182947121  | 6.14E-08 | 0.089890139 |
| left Ventral posterolateral nucleus of the thalamus   | 0.047968781  | 2.53946031   | 2.79E-08 | 0.061596292 |
| left Ventral posteromedial nucleus of the thalamus    | 0.11012083   | 2.838030994  | 1.72E-08 | 0.046368419 |
| left Ventral premammillary nucleus                    | 0.005702379  | 2.194683578  | 5.87E-08 | 0.089075533 |
| left ventral spinocerebellar tract                    | 0.002529638  | 1.060808672  | 1.85E-06 | 0.360158027 |
| left Ventral tegmental area                           | 0.014491875  | 2.511106603  | 2.96E-08 | 0.063283236 |
| left Ventral tegmental nucleus                        | 0.001672133  | 2.911792962  | 1.59E-08 | 0.042876245 |
| left Ventrolateral preoptic nucleus                   | 0.000780327  | 0.655175705  | 1.25E-05 | 0.5654756   |
| left Ventromedial hypothalamic nucleus                | 0.006096839  | 1.097344588  | 1.57E-06 | 0.345253245 |
| left Ventromedial preoptic nucleus                    | 0.001114754  | 0.934317907  | 4.15E-06 | 0.412520075 |
| left vestibular nerve                                 | 0.009175305  | 2.39922511   | 3.96E-08 | 0.069657177 |
| left Vestibulocerebellar nucleus                      | 0.002598259  | 1.376722996  | 4.91E-07 | 0.248596453 |
| left Visceral area                                    | 0.063369968  | 2.416313088  | 3.75E-08 | 0.068816837 |
| left vomeronasal nerve                                | 7.72E-05     | 0.183144716  | 2.90E-03 | 0.865888209 |
| left Xiphoid thalamic nucleus                         | 0.003267081  | 2.137518741  | 6.61E-08 | 0.095423361 |
| left Zona incerta                                     | 0.07123279   | 5.119823445  | 5.08E-09 | 0.012947224 |
| Lobule II                                             | 0.122408947  | 1.688213713  | 1.96E-07 | 0.167887995 |
| Lobule III                                            | 0.103776149  | 0.666278007  | 1.19E-05 | 0.558882954 |
| Lobules IV-V                                          | 0.381531606  | 1.456472202  | 3.72E-07 | 0.225666074 |
| Medial septal nucleus                                 | 0.035346317  | 3.842731539  | 7.30E-09 | 0.019935335 |
| Median eminence                                       | 0.002778313  | 1.857992371  | 1.31E-07 | 0.134478647 |

|                                              |              |              |          |             |
|----------------------------------------------|--------------|--------------|----------|-------------|
| Median preoptic nucleus                      | 0.003558643  | 2.252676244  | 5.14E-08 | 0.083049896 |
| Nodulus (X)                                  | 0.046734646  | 0.562618546  | 2.58E-05 | 0.618727111 |
| Nucleus raphe magnus                         | 0.014397534  | 2.104754504  | 7.40E-08 | 0.098519369 |
| Nucleus raphe obscurus                       | 0.003455727  | 1.157169176  | 1.10E-06 | 0.323869424 |
| Nucleus raphe pallidus                       | 0.002220904  | 0.952464536  | 3.35E-06 | 0.406157597 |
| Nucleus raphe pontis                         | 0.004150327  | 2.017751865  | 9.23E-08 | 0.109292202 |
| optic chiasm                                 | 0.010272875  | 0.984505005  | 3.13E-06 | 0.390103299 |
| Periaqueductal gray                          | 0.368606975  | 4.181566883  | 6.40E-09 | 0.016557529 |
| posterior commissure                         | 0.003267078  | 2.186949494  | 6.08E-08 | 0.089593356 |
| pyramidal decussation                        | 0.001363442  | 0.425990321  | 6.12E-05 | 0.706785853 |
| Pyramus (VIII)                               | 0.025827963  | 0.395118908  | 9.00E-05 | 0.725758058 |
| Rhomboid nucleus                             | 0.006465592  | 2.895204298  | 1.60E-08 | 0.043994394 |
| right Abducens nucleus                       | 7.72E-05     | 0.316780025  | 2.06E-04 | 0.776959928 |
| right Accessory facial motor nucleus         | -6.00E-05    | -0.285959431 | 5.31E-04 | 0.79467117  |
| right Accessory olfactory bulb               | 0.005676614  | 0.470445253  | 3.71E-05 | 0.67989745  |
| right Accessory supraoptic group             | -0.000214374 | -1.847121853 | 1.38E-07 | 0.135905854 |
| right Accessory trigeminal nucleus           | 0.000188649  | 0.399041391  | 8.14E-05 | 0.723821124 |
| right Agranular insular area, dorsal part    | 0.097472879  | 2.274497126  | 4.97E-08 | 0.080977169 |
| right Agranular insular area, posterior part | 0.077981523  | 3.524696824  | 9.25E-09 | 0.024108062 |
| right Agranular insular area, ventral part   | 0.058816201  | 2.651877969  | 2.37E-08 | 0.054336389 |
| right alveus                                 | 0.0552918    | 8.819176162  | 4.81E-09 | 0.001967727 |
| right amygdalar capsule                      | 0.00208371   | 0.94398458   | 3.72E-06 | 0.409491468 |
| right Anterior amygdalar area                | 0.016901357  | 2.701132067  | 2.17E-08 | 0.052044429 |
| right Anterior area                          | 0.050618679  | 2.143489875  | 6.54E-08 | 0.094782105 |
| right Anterior cingulate area                | 0.079902628  | 2.029786204  | 8.95E-08 | 0.107696862 |
| right Anterior cingulate area, ventral part  | 0.042489717  | 1.560106326  | 2.68E-07 | 0.19861222  |
| right Anterior hypothalamic nucleus          | 0.015709408  | 2.013737632  | 9.33E-08 | 0.109793526 |
| right Anterior olfactory nucleus             | 0.068274479  | 1.697316164  | 1.91E-07 | 0.165818233 |
| right Anterior pretectal nucleus             | 0.043381164  | 4.121015748  | 6.63E-09 | 0.016711482 |
| right Anterior tegmental nucleus             | 0.000617404  | 1.244625983  | 7.54E-07 | 0.293120038 |
| right Anterodorsal nucleus                   | 0.010032774  | 3.71734501   | 7.81E-09 | 0.02076658  |
| right Anterodorsal preoptic nucleus          | 0.003009832  | 2.51774756   | 2.91E-08 | 0.063077846 |
| right Anterolateral visual area              | 0.022449621  | 1.743085727  | 1.70E-07 | 0.156529958 |
| right Anteromedial nucleus, dorsal part      | 0.017544502  | 4.998008929  | 5.33E-09 | 0.012947224 |

|                                                             |             |             |          |             |
|-------------------------------------------------------------|-------------|-------------|----------|-------------|
| right Anteromedial nucleus, ventral part                    | 0.011130388 | 4.26364881  | 6.35E-09 | 0.015563882 |
| right Anteromedial visual area                              | 0.031041757 | 1.855217005 | 1.35E-07 | 0.134586411 |
| right Anteroventral nucleus of thalamus                     | 0.024713203 | 3.76523203  | 7.85E-09 | 0.02076658  |
| right Anteroventral periventricular nucleus                 | 0.008369228 | 4.476962498 | 5.96E-09 | 0.014437957 |
| right Anteroventral preoptic nucleus                        | 0.002289535 | 1.696893258 | 1.94E-07 | 0.165818233 |
| right Arcuate hypothalamic nucleus                          | 6.00E-05    | 0.01399536  | 5.77E-02 | 0.99037049  |
| right Area postrema                                         | 0.004193201 | 2.476098241 | 3.22E-08 | 0.065304269 |
| right Area prostriata                                       | 0.019285304 | 3.247489268 | 1.17E-08 | 0.03032609  |
| right auditory radiation                                    | 0.021909186 | 3.713804196 | 8.26E-09 | 0.02076658  |
| right Barrington's nucleus                                  | 0.000574527 | 1.631559675 | 2.28E-07 | 0.180507648 |
| right Basolateral amygdalar nucleus, anterior part          | 0.031213098 | 3.181490945 | 1.23E-08 | 0.032224492 |
| right Basolateral amygdalar nucleus, posterior part         | 0.019928314 | 2.137052223 | 6.67E-08 | 0.095423361 |
| right Basolateral amygdalar nucleus, ventral part           | 0.010710196 | 2.718327772 | 2.10E-08 | 0.05131053  |
| right Basomedial amygdalar nucleus, anterior part           | 0.0296096   | 4.373850953 | 5.98E-09 | 0.014437957 |
| right Basomedial amygdalar nucleus, posterior part          | 0.020717251 | 3.375804005 | 1.02E-08 | 0.027865625 |
| right Bed nuclei of the stria terminalis                    | 0.056612366 | 3.768742043 | 7.92E-09 | 0.02076658  |
| right Bed nucleus of the accessory olfactory tract          | 0.001149055 | 2.85190399  | 1.69E-08 | 0.045743854 |
| right Bed nucleus of the anterior commissure                | 0.001114754 | 3.087520059 | 1.30E-08 | 0.036160924 |
| right brachium of the inferior colliculus                   | 0.005522351 | 1.973266081 | 1.05E-07 | 0.115061007 |
| right brachium of the superior colliculus                   | 0.004750582 | 2.128773361 | 6.79E-08 | 0.09637781  |
| right Caudoputamen                                          | 0.865135418 | 4.291639692 | 6.29E-09 | 0.015563882 |
| right Central amygdalar nucleus                             | 0.060428159 | 4.057120548 | 6.77E-09 | 0.017198719 |
| right Central lateral nucleus of the thalamus               | 0.012656758 | 2.114946684 | 7.12E-08 | 0.097427205 |
| right Central medial nucleus of the thalamus                | 0.007760429 | 2.712949489 | 2.14E-08 | 0.051367794 |
| right cerebal peduncle                                      | 0.029489436 | 2.094328282 | 7.70E-08 | 0.099239787 |
| right choroid plexus                                        | 0.031341555 | 1.524446382 | 3.12E-07 | 0.206241248 |
| right cingulum bundle                                       | 0.062151966 | 4.827202102 | 5.42E-09 | 0.013530584 |
| right Claustrum                                             | 0.015315052 | 2.744931662 | 2.03E-08 | 0.049756675 |
| right columns of the fornix                                 | 0.015820931 | 6.19360118  | 4.91E-09 | 0.00745455  |
| right commissural branch of stria terminalis                | 0.000660281 | 1.403495045 | 4.49E-07 | 0.240546511 |
| right Copula pyramidis                                      | 0.047231635 | 1.074557528 | 1.66E-06 | 0.355431192 |
| right Cortical amygdalar area, anterior part                | 0.026385329 | 2.940814273 | 1.50E-08 | 0.042375807 |
| right Cortical amygdalar area, posterior part, lateral zone | 0.033871254 | 2.438032898 | 3.55E-08 | 0.067403702 |
| right Cortical amygdalar area, posterior part, medial zone  | 0.044109899 | 3.409904455 | 1.01E-08 | 0.026546464 |

|                                                            |             |              |          |             |
|------------------------------------------------------------|-------------|--------------|----------|-------------|
| right Cortical subplate                                    | 0.010075637 | 3.144319134  | 1.26E-08 | 0.033909936 |
| right corticospinal tract                                  | 0.003378567 | 2.992314226  | 1.45E-08 | 0.039622424 |
| right crossed tectospinal pathway                          | 0.017441682 | 2.226541525  | 5.42E-08 | 0.086022212 |
| right Crus 1                                               | 0.204361396 | 1.826814774  | 1.45E-07 | 0.139542662 |
| right Crus 2                                               | 0.083676134 | 0.80138031   | 5.90E-06 | 0.483867226 |
| right cuneate fascicle                                     | -7.72E-05   | -0.153125848 | 5.99E-03 | 0.886830519 |
| right Cuneate nucleus                                      | 0.012176607 | 2.27624203   | 4.93E-08 | 0.080934447 |
| right Cuneiform nucleus                                    | 0.021163275 | 2.604511528  | 2.55E-08 | 0.05715762  |
| right Dentate gyrus                                        | 0.218208405 | 3.980986376  | 6.95E-09 | 0.018438655 |
| right Dentate nucleus                                      | 0.011747821 | 2.869523799  | 1.64E-08 | 0.045176827 |
| right Diagonal band nucleus                                | 0.024361665 | 2.612901633  | 2.54E-08 | 0.056479817 |
| right dorsal acoustic stria                                | 0.000325853 | 1.170375762  | 1.03E-06 | 0.319234538 |
| right Dorsal auditory area                                 | 0.036684227 | 2.113600332  | 7.26E-08 | 0.097442583 |
| right Dorsal cochlear nucleus                              | 0.021686271 | 1.583129294  | 2.52E-07 | 0.192770044 |
| right dorsal limb                                          | 0.003558647 | 0.817920651  | 5.67E-06 | 0.474517847 |
| right Dorsal motor nucleus of the vagus nerve              | 0.010547307 | 3.564274524  | 9.21E-09 | 0.022894006 |
| right Dorsal nucleus raphe                                 | 0.001389192 | 0.47446843   | 3.44E-05 | 0.677900206 |
| right Dorsal part of the lateral geniculate complex        | 0.029077982 | 3.229411417  | 1.21E-08 | 0.030463735 |
| right Dorsal peduncular area                               | 0.01139621  | 1.429397008  | 4.04E-07 | 0.23341593  |
| right Dorsal premammillary nucleus                         | 0.003875913 | 2.125193335  | 6.86E-08 | 0.096764941 |
| right dorsal spinocerebellar tract                         | 0.00292408  | 2.93239447   | 1.52E-08 | 0.042556436 |
| right Dorsal tegmental nucleus                             | 0.004193192 | 4.242202758  | 6.32E-09 | 0.015563882 |
| right Dorsal terminal nucleus of the accessory optic tract | 0.000514502 | 2.056912254  | 8.33E-08 | 0.104301363 |
| right Dorsomedial nucleus of the hypothalamus              | 0.006156911 | 1.675587251  | 1.99E-07 | 0.171081149 |
| right Ectorhinal area                                      | 0.083049422 | 3.750754469  | 8.14E-09 | 0.02076658  |
| right Endopiriform nucleus, dorsal part                    | 0.052762244 | 2.559007794  | 2.70E-08 | 0.060519067 |
| right Endopiriform nucleus, ventral part                   | 0.024730385 | 2.732747205  | 2.04E-08 | 0.050509999 |
| right Entorhinal area, lateral part                        | 0.21814084  | 2.969802137  | 1.47E-08 | 0.040783876 |
| right Entorhinal area, medial part, dorsal zone            | 0.203348431 | 2.814423794  | 1.80E-08 | 0.047137338 |
| right Ethmoid nucleus of the thalamus                      | 0.007768998 | 2.926937309  | 1.58E-08 | 0.042662245 |
| right external capsule                                     | 0.039110737 | 6.266433599  | 4.93E-09 | 0.00745455  |
| right External cuneate nucleus                             | 0.008506456 | 2.514333894  | 2.93E-08 | 0.063280644 |
| right external medullary lamina of the thalamus            | 0.004673379 | 3.099941193  | 1.28E-08 | 0.036057403 |
| right Facial motor nucleus                                 | 0.030167025 | 3.708174845  | 8.07E-09 | 0.02076658  |

|                                                                 |             |             |          |             |
|-----------------------------------------------------------------|-------------|-------------|----------|-------------|
| right facial nerve                                              | 0.003112743 | 2.667658984 | 2.27E-08 | 0.054011838 |
| right fasciculus retroflexus                                    | 0.007571743 | 5.815211406 | 5.00E-09 | 0.00893279  |
| right Fasciola cinerea                                          | 0.002169509 | 1.129340634 | 1.38E-06 | 0.332428969 |
| right Fastigial nucleus                                         | 0.021429081 | 2.786762025 | 1.90E-08 | 0.047958755 |
| right Field CA1                                                 | 0.497103232 | 6.679410281 | 4.87E-09 | 0.006681417 |
| right Field CA2                                                 | 0.018616374 | 3.64395434  | 8.61E-09 | 0.021637953 |
| right Field CA3                                                 | 0.286706042 | 4.921201375 | 5.29E-09 | 0.012947224 |
| right Fields of Forel                                           | 0.011867868 | 4.549935858 | 6.11E-09 | 0.014437957 |
| right fimbria                                                   | 0.062871881 | 2.771716591 | 1.96E-08 | 0.048696787 |
| right Flocculus                                                 | 0.04185493  | 1.505496995 | 3.32E-07 | 0.211432988 |
| right Frontal pole                                              | 0.020974533 | 1.88960191  | 1.25E-07 | 0.128525639 |
| right Fundus of striatum                                        | 0.012630946 | 1.428081882 | 4.11E-07 | 0.233501378 |
| right Gigantocellular reticular nucleus                         | 0.109563355 | 3.252450581 | 1.17E-08 | 0.03032609  |
| right Globus pallidus, external segment                         | 0.062160383 | 4.006020112 | 6.86E-09 | 0.018274991 |
| right Globus pallidus, internal segment                         | 0.02256944  | 3.739929818 | 8.18E-09 | 0.02076658  |
| right Gracile nucleus                                           | 0.004244663 | 2.653903914 | 2.36E-08 | 0.054310458 |
| right Gustatory areas                                           | 0.052187872 | 3.676429454 | 8.37E-09 | 0.021285691 |
| right Hippocampal formation                                     | 0.021334669 | 3.909375393 | 7.20E-09 | 0.019764937 |
| right Hippocampo-amygdalar transition area                      | 0.013299854 | 3.284152678 | 1.10E-08 | 0.030137227 |
| right inferior cerebellar peduncle                              | 0.033562758 | 3.595586808 | 8.95E-09 | 0.022315594 |
| right Inferior colliculus                                       | 0.189491843 | 2.614984021 | 2.52E-08 | 0.056441965 |
| right Inferior olivary complex                                  | 0.012648138 | 1.76173515  | 1.58E-07 | 0.153483918 |
| right Inferior salivatory nucleus                               | 0.000437331 | 1.069818498 | 1.80E-06 | 0.356429486 |
| right Infracerebellar nucleus                                   | 0.004930655 | 2.875408381 | 1.62E-08 | 0.045050275 |
| right Infralimbic area                                          | 0.011602163 | 1.032282314 | 2.20E-06 | 0.371367478 |
| right Interanterodorsal nucleus of the thalamus                 | 0.004990649 | 3.426335179 | 9.91E-09 | 0.026252172 |
| right Intercalated amygdalar nucleus                            | 0.005736713 | 2.555211815 | 2.72E-08 | 0.060749856 |
| right Intergeniculate leaflet of the lateral geniculate complex | 0.003224219 | 3.409884368 | 1.00E-08 | 0.026546464 |
| right Intermediate geniculate nucleus                           | 0.000711729 | 1.86994087  | 1.28E-07 | 0.132312314 |
| right Intermediate reticular nucleus                            | 0.119193101 | 4.100288337 | 6.66E-09 | 0.01692587  |
| right internal capsule                                          | 0.134884912 | 4.055231012 | 6.74E-09 | 0.017198719 |
| right Interposed nucleus                                        | 0.044350143 | 3.208683397 | 1.22E-08 | 0.031040175 |
| right Interstitial nucleus of Cajal                             | 0.00548802  | 4.608411792 | 5.84E-09 | 0.014437957 |
| right Intertrigeminal nucleus                                   | 0.001474911 | 1.25269385  | 7.08E-07 | 0.29064881  |

|                                                             |             |             |          |             |
|-------------------------------------------------------------|-------------|-------------|----------|-------------|
| right Koelliker-Fuse subnucleus                             | 0.005968242 | 2.378827085 | 4.12E-08 | 0.071301719 |
| right Lateral amygdalar nucleus                             | 0.031264443 | 1.52472619  | 3.16E-07 | 0.206241248 |
| right Lateral dorsal nucleus of thalamus                    | 0.056097843 | 4.597682727 | 5.88E-09 | 0.014437957 |
| right Lateral habenula                                      | 0.00532505  | 0.938369782 | 4.00E-06 | 0.410891785 |
| right Lateral hypothalamic area                             | 0.091358315 | 4.436356009 | 5.93E-09 | 0.014437957 |
| right lateral lemniscus                                     | 0.022235195 | 2.253429615 | 5.19E-08 | 0.083049896 |
| right Lateral mammillary nucleus                            | 0.001912202 | 0.62852088  | 1.66E-05 | 0.579531355 |
| right lateral olfactory tract, body                         | 0.026102378 | 1.872830223 | 1.27E-07 | 0.131926018 |
| right Lateral posterior nucleus of the thalamus             | 0.045027518 | 3.313561534 | 1.07E-08 | 0.029540377 |
| right Lateral preoptic area                                 | 0.016978541 | 2.712136377 | 2.12E-08 | 0.051367794 |
| right lateral recess                                        | 0.00563384  | 1.053335678 | 1.96E-06 | 0.362839741 |
| right Lateral reticular nucleus, magnocellular part         | 0.015786706 | 3.065961869 | 1.35E-08 | 0.036804518 |
| right Lateral reticular nucleus, parvicellular part         | 0.001423453 | 2.40588053  | 3.93E-08 | 0.069587455 |
| right Lateral septal nucleus, caudal (caudodorsal) part     | 0.024558813 | 3.352178311 | 1.04E-08 | 0.028230329 |
| right Lateral septal nucleus, rostral (rostroventral) part  | 0.104683729 | 3.951147746 | 7.01E-09 | 0.018984073 |
| right Lateral septal nucleus, ventral part                  | 0.039942465 | 5.276317724 | 5.23E-09 | 0.012947224 |
| right Lateral terminal nucleus of the accessory optic tract | 0.001560653 | 3.251007501 | 1.16E-08 | 0.03032609  |
| right lateral ventricle                                     | 0.093535849 | 2.065215828 | 8.17E-08 | 0.103254021 |
| right Lateral vestibular nucleus                            | 0.012991215 | 3.482651538 | 9.57E-09 | 0.024816546 |
| right Lateral visual area                                   | 0.041297754 | 1.568457513 | 2.60E-07 | 0.196319964 |
| right Laterodorsal tegmental nucleus                        | 0.007100118 | 3.822004117 | 7.57E-09 | 0.020015083 |
| right Laterointermediate area                               | 0.014217578 | 1.310954072 | 5.92E-07 | 0.270287636 |
| right Linear nucleus of the medulla                         | 0.001534941 | 1.929453782 | 1.15E-07 | 0.121827234 |
| right Lingula (I)                                           | 0.003490075 | 0.941784327 | 3.85E-06 | 0.409616068 |
| right Locus ceruleus                                        | 0.000394455 | 1.023860361 | 2.34E-06 | 0.374593253 |
| right Magnocellular nucleus                                 | 0.011764909 | 1.782240311 | 1.54E-07 | 0.149056978 |
| right Magnocellular reticular nucleus                       | 0.022252312 | 2.661877239 | 2.31E-08 | 0.054212512 |
| right Main olfactory bulb                                   | 0.261185451 | 0.982005617 | 3.23E-06 | 0.390856831 |
| right mammillary peduncle                                   | 0.000686001 | 0.700360804 | 1.02E-05 | 0.538835433 |
| right mammillotegmental tract                               | 0.00445904  | 1.978014778 | 1.03E-07 | 0.114593352 |
| right mammillothalamic tract                                | 0.008600762 | 4.935279022 | 5.31E-09 | 0.012947224 |
| right Medial accesory oculomotor nucleus                    | 0.001226235 | 1.219934241 | 8.77E-07 | 0.300454124 |
| right Medial amygdalar nucleus                              | 0.094916968 | 5.342103285 | 5.25E-09 | 0.012947224 |
| right medial corticohypothalamic tract                      | 0.000471624 | 1.335532523 | 5.38E-07 | 0.262897452 |



|                                                            |              |              |          |             |
|------------------------------------------------------------|--------------|--------------|----------|-------------|
| right medial forebrain bundle                              | 0.00177503   | 2.654064593  | 2.34E-08 | 0.054310458 |
| right Medial geniculate complex, dorsal part               | 0.006268361  | 3.604331408  | 8.90E-09 | 0.022251122 |
| right Medial geniculate complex, medial part               | 0.009020947  | 3.099408767  | 1.28E-08 | 0.036057403 |
| right Medial geniculate complex, ventral part              | 0.010598772  | 2.462936784  | 3.30E-08 | 0.066300114 |
| right Medial habenula                                      | 0.010204227  | 1.384929316  | 4.65E-07 | 0.246704007 |
| right medial lemniscus                                     | 0.03087019   | 3.840459908  | 7.40E-09 | 0.019935335 |
| right medial longitudinal fascicle                         | 0.008257742  | 3.242659522  | 1.15E-08 | 0.03032609  |
| right Medial mammillary nucleus                            | 0.018144678  | 1.859353714  | 1.30E-07 | 0.134431422 |
| right Medial preoptic area                                 | 0.019671093  | 2.872951966  | 1.63E-08 | 0.045073974 |
| right Medial preoptic nucleus                              | 0.020022699  | 4.35728244   | 6.03E-09 | 0.014437957 |
| right Medial pretectal area                                | 0.000737456  | 1.005626003  | 2.74E-06 | 0.381262894 |
| right Medial terminal nucleus of the accessory optic tract | 0.002040861  | 1.779657264  | 1.56E-07 | 0.149263146 |
| right Medial vestibular nucleus                            | 0.056080848  | 2.756198829  | 1.99E-08 | 0.049162557 |
| right Mediodorsal nucleus of thalamus                      | 0.036632621  | 2.425516591  | 3.63E-08 | 0.068418597 |
| right Medullary reticular nucleus, dorsal part             | 0.062400725  | 4.149274943  | 6.51E-09 | 0.016701326 |
| right Medullary reticular nucleus, ventral part            | 0.049083651  | 2.822775112  | 1.77E-08 | 0.046778579 |
| right Midbrain reticular nucleus                           | 0.201042261  | 3.904051329  | 7.14E-09 | 0.019764937 |
| right Midbrain reticular nucleus, retrorubral area         | 0.005771013  | 2.440502646  | 3.52E-08 | 0.067403702 |
| right Midbrain trigeminal nucleus                          | 0.000668849  | 2.402336691  | 3.86E-08 | 0.069587455 |
| right middle cerebellar peduncle                           | 0.037876042  | 2.539216125  | 2.81E-08 | 0.061596292 |
| right Motor nucleus of trigeminal                          | 0.014225986  | 2.864399144  | 1.65E-08 | 0.045418219 |
| right motor root of the trigeminal nerve                   | 0.001414883  | 1.437012431  | 3.98E-07 | 0.231056333 |
| right nigrostriatal tract                                  | 0.006139712  | 4.605937942  | 5.86E-09 | 0.014437957 |
| right Nucleus accumbens                                    | 0.118532605  | 2.598616037  | 2.57E-08 | 0.057587183 |
| right Nucleus ambiguus, dorsal division                    | 0.000523081  | 0.643530479  | 1.40E-05 | 0.57167325  |
| right Nucleus ambiguus, ventral division                   | -0.000265827 | -0.416690665 | 6.71E-05 | 0.71268703  |
| right Nucleus incertus                                     | 0.001749312  | 1.378675991  | 4.82E-07 | 0.248261924 |
| right Nucleus of Darkschewitsch                            | 0.006105401  | 3.263807161  | 1.13E-08 | 0.03026965  |
| right Nucleus of reuniens                                  | 0.027868812  | 4.449111897  | 5.91E-09 | 0.014437957 |
| right Nucleus of Roller                                    | 0.001706435  | 2.436934941  | 3.50E-08 | 0.067403702 |
| right Nucleus of the brachium of the inferior colliculus   | 0.002606817  | 3.180931183  | 1.24E-08 | 0.032224492 |
| right Nucleus of the lateral lemniscus                     | 0.013342884  | 1.321689116  | 5.70E-07 | 0.267189837 |
| right Nucleus of the lateral olfactory tract               | 0.012845375  | 3.711074121  | 8.22E-09 | 0.02076658  |
| right Nucleus of the optic tract                           | 0.010410103  | 4.469319549  | 6.06E-09 | 0.014437957 |

|                                                           |              |              |          |             |
|-----------------------------------------------------------|--------------|--------------|----------|-------------|
| right Nucleus of the posterior commissure                 | 0.005419408  | 2.321996505  | 4.57E-08 | 0.076311811 |
| right Nucleus of the solitary tract                       | 0.053611128  | 4.80977266   | 5.40E-09 | 0.013530584 |
| right Nucleus of the trapezoid body                       | 0.004759144  | 2.824164214  | 1.76E-08 | 0.046778579 |
| right Nucleus prepositus                                  | 0.006697131  | 2.067576494  | 8.09E-08 | 0.103052604 |
| right Nucleus sagulum                                     | 0.002058023  | 1.703255337  | 1.89E-07 | 0.16469743  |
| right Nucleus x                                           | 0.001629277  | 1.19869283   | 9.16E-07 | 0.308765185 |
| right Nucleus y                                           | 0.000763182  | 1.928000936  | 1.17E-07 | 0.121827234 |
| right oculomotor nerve                                    | -0.000137197 | -0.313213844 | 2.73E-04 | 0.778167869 |
| right Oculomotor nucleus                                  | 0.001440605  | 1.651878205  | 2.16E-07 | 0.175904926 |
| right olfactory nerve layer of main olfactory bulb        | 0.032593715  | 0.825141562  | 5.22E-06 | 0.471526664 |
| right Olfactory tubercle                                  | 0.083134781  | 1.508898297  | 3.27E-07 | 0.210659704 |
| right Olivary pretectal nucleus                           | 0.002709712  | 3.867641771  | 7.43E-09 | 0.019935335 |
| right optic nerve                                         | 0.000531654  | 0.309599826  | 3.18E-04 | 0.77986907  |
| right optic radiation                                     | 0.127879425  | 4.901082687  | 5.35E-09 | 0.012947224 |
| right optic tract                                         | 0.032164887  | 2.880802181  | 1.61E-08 | 0.044791278 |
| right Orbital area, lateral part                          | 0.059476681  | 2.070818171  | 8.01E-08 | 0.102695638 |
| right Orbital area, medial part                           | 0.028134665  | 1.931711704  | 1.16E-07 | 0.121827234 |
| right Orbital area, ventrolateral part                    | 0.033888659  | 1.501336156  | 3.43E-07 | 0.212101011 |
| right Parabigeminal nucleus                               | 0.00190367   | 2.216073809  | 5.56E-08 | 0.087002248 |
| right Parabrachial nucleus                                | 0.043303996  | 3.498496856  | 9.48E-09 | 0.024715094 |
| right Paracentral nucleus                                 | 0.013471449  | 2.34404615   | 4.39E-08 | 0.074313065 |
| right Parafascicular nucleus                              | 0.022518175  | 2.115819339  | 7.19E-08 | 0.097427205 |
| right Paraflocculus                                       | 0.099865109  | 1.784309003  | 1.50E-07 | 0.148955366 |
| right Paragigantocellular reticular nucleus, dorsal part  | 0.008420693  | 2.228832685  | 5.37E-08 | 0.085878575 |
| right Paragigantocellular reticular nucleus, lateral part | 0.024336043  | 2.626436153  | 2.49E-08 | 0.055639731 |
| right Paramedian lobule                                   | 0.110498642  | 1.171888372  | 1.00E-06 | 0.319032627 |
| right Paranigral nucleus                                  | 0.001629252  | 2.097960155  | 7.77E-08 | 0.099239787 |
| right Parapyramidal nucleus                               | 0.003430008  | 2.68924526   | 2.19E-08 | 0.052815276 |
| right Parasolitary nucleus                                | 0.000728881  | 1.013194137  | 2.57E-06 | 0.378443378 |
| right Parastrial nucleus                                  | 0.002426728  | 2.461038227  | 3.32E-08 | 0.066342613 |
| right Parasubiculum                                       | 0.040028269  | 2.795486707  | 1.86E-08 | 0.047720246 |
| right Parasubthalamic nucleus                             | 0.006937206  | 4.388014537  | 6.01E-09 | 0.014437957 |
| right Parataenial nucleus                                 | 0.010238543  | 3.087842726  | 1.30E-08 | 0.036160924 |
| right Paratrigeminal nucleus                              | 0.003781595  | 2.28323026   | 4.85E-08 | 0.080320733 |

|                                                  |             |             |          |             |
|--------------------------------------------------|-------------|-------------|----------|-------------|
| right Paratrochlear nucleus                      | 0.000883229 | 3.01576435  | 1.42E-08 | 0.038645663 |
| right Paraventricular hypothalamic nucleus       | 0.021334647 | 3.580130479 | 9.03E-09 | 0.022616376 |
| right Paraventricular nucleus of the thalamus    | 0.012665215 | 1.538014706 | 2.88E-07 | 0.203947567 |
| right Parvicellular motor 5 nucleus              | 0.000308712 | 0.224249155 | 1.61E-03 | 0.836450969 |
| right Parvicellular reticular nucleus            | 0.081197305 | 3.08970268  | 1.31E-08 | 0.036160924 |
| right Pedunclopontine nucleus                    | 0.038982125 | 3.82854827  | 7.53E-09 | 0.019973111 |
| right Perifornical nucleus                       | 0.009689804 | 3.280933201 | 1.10E-08 | 0.030147901 |
| right Peripeduncular nucleus                     | 0.003181345 | 3.833875939 | 7.50E-09 | 0.019973111 |
| right Perireunensis nucleus                      | 0.006439865 | 4.073438459 | 6.80E-09 | 0.017198719 |
| right Perirhinal area                            | 0.035457855 | 3.7586888   | 8.03E-09 | 0.02076658  |
| right Peritrigeminal zone                        | 0.012596738 | 2.300205905 | 4.73E-08 | 0.078526363 |
| right Periventricular hypothalamic nucleus       | 0.014166055 | 1.849230313 | 1.36E-07 | 0.135686096 |
| right Piriform area                              | 0.367542842 | 2.441832895 | 3.58E-08 | 0.067403702 |
| right Piriform-amygdalar area                    | 0.037455636 | 2.756200073 | 2.01E-08 | 0.049162557 |
| right Pontine central gray                       | 0.012468115 | 1.721735865 | 1.81E-07 | 0.160649346 |
| right Pontine gray                               | 0.024704527 | 1.382145916 | 4.73E-07 | 0.247351469 |
| right Pontine reticular nucleus                  | 0.087268363 | 3.020860868 | 1.39E-08 | 0.038625783 |
| right Pontine reticular nucleus, caudal part     | 0.080751325 | 3.226370063 | 1.20E-08 | 0.030463735 |
| right Posterior amygdalar nucleus                | 0.041528834 | 4.406799949 | 6.08E-09 | 0.014437957 |
| right Posterior auditory area                    | 0.021206185 | 2.251973684 | 5.23E-08 | 0.083049896 |
| right Posterior complex of the thalamus          | 0.064715973 | 3.07912769  | 1.32E-08 | 0.036540586 |
| right Posterior hypothalamic nucleus             | 0.029712635 | 2.474513061 | 3.25E-08 | 0.06530843  |
| right Posterior intralaminar thalamic nucleus    | 0.00667998  | 2.53339379  | 2.85E-08 | 0.062001701 |
| right Posterior limiting nucleus of the thalamus | 0.007160153 | 2.734123291 | 2.06E-08 | 0.050509999 |
| right Posterior pretectal nucleus                | 0.004810621 | 2.155379181 | 6.37E-08 | 0.093466842 |
| right Posterior triangular thalamic nucleus      | 0.010204305 | 3.260521099 | 1.14E-08 | 0.030289131 |
| right Posterodorsal preoptic nucleus             | 0.000565954 | 2.349053275 | 4.35E-08 | 0.073851424 |
| right Posterodorsal tegmental nucleus            | 0.000265829 | 0.250848081 | 9.83E-04 | 0.818244723 |
| right Posterolateral visual area                 | 0.040422884 | 2.26270316  | 5.06E-08 | 0.082277609 |
| right posteromedial visual area                  | 0.041211806 | 1.906674445 | 1.21E-07 | 0.12557058  |
| right Postpiriform transition area               | 0.025287663 | 1.643914171 | 2.22E-07 | 0.177558531 |
| right Postrhinal area                            | 0.053688581 | 2.203030863 | 5.71E-08 | 0.088393232 |
| right Postsubiculum                              | 0.052805226 | 3.897697426 | 7.17E-09 | 0.019764937 |
| right Precommissural nucleus                     | 0.004776272 | 1.528257305 | 3.07E-07 | 0.205705264 |

|                                                         |              |              |          |             |
|---------------------------------------------------------|--------------|--------------|----------|-------------|
| right Prelimbic area                                    | 0.055497808  | 2.40436606   | 3.83E-08 | 0.069587455 |
| right Preparasubthalamic nucleus                        | 0.000523075  | 1.307020306  | 6.04E-07 | 0.271454151 |
| right Presubiculum                                      | 0.036349569  | 3.684935358  | 8.41E-09 | 0.021285691 |
| right Primary auditory area                             | 0.081283071  | 2.931603139  | 1.52E-08 | 0.042556436 |
| right Primary motor area                                | 0.264746622  | 3.337813855  | 1.05E-08 | 0.028794324 |
| right Primary somatosensory area, barrel field          | 0.173945696  | 1.797011784  | 1.46E-07 | 0.146391269 |
| right Primary somatosensory area, lower limb            | 0.068720554  | 2.919508316  | 1.57E-08 | 0.042662245 |
| right Primary somatosensory area, mouth                 | 0.150552289  | 3.438328775  | 9.86E-09 | 0.02587069  |
| right Primary somatosensory area, nose                  | 0.08055418   | 2.567834343  | 2.66E-08 | 0.059929596 |
| right Primary somatosensory area, trunk                 | 0.046202539  | 2.108217537  | 7.33E-08 | 0.098142521 |
| right Primary somatosensory area, unassigned            | 0.030227117  | 2.143771655  | 6.48E-08 | 0.094782105 |
| right Primary somatosensory area, upper limb            | 0.098124492  | 2.646577835  | 2.44E-08 | 0.054589968 |
| right Primary visual area                               | 0.239391262  | 1.708746553  | 1.86E-07 | 0.163517816 |
| right principal mammillary tract                        | 0.001114766  | 1.395841629  | 4.57E-07 | 0.242998782 |
| right Principal sensory nucleus of the trigeminal       | 0.027929073  | 1.587798679  | 2.49E-07 | 0.191667464 |
| right Prosubiculum                                      | 0.062091822  | 3.859431429  | 7.47E-09 | 0.019935335 |
| right pyramid                                           | 0.010195633  | 1.914962742  | 1.20E-07 | 0.124062713 |
| right Red nucleus                                       | 0.030810234  | 3.112175844  | 1.27E-08 | 0.035574776 |
| right Reticular nucleus of the thalamus                 | 0.084129404  | 2.888378526  | 1.61E-08 | 0.044360911 |
| right Retrochiasmatic area                              | 0.002529621  | 0.847320143  | 5.02E-06 | 0.458982126 |
| right Retroparafascicular nucleus                       | 0.002581094  | 2.431888186  | 3.61E-08 | 0.067829432 |
| right Retrosplenial area, dorsal part                   | 0.102352095  | 1.845361323  | 1.39E-07 | 0.136046793 |
| right Retrosplenial area, lateral agranular part        | 0.077270022  | 2.000307277  | 9.63E-08 | 0.111660554 |
| right Retrosplenial area, ventral part                  | 0.070187376  | 1.227791479  | 8.39E-07 | 0.297737982 |
| right Rostrolateral area                                | 0.029095352  | 1.478069596  | 3.60E-07 | 0.21889705  |
| right rubrospinal tract                                 | 0.011156191  | 2.300358744  | 4.69E-08 | 0.078526363 |
| right Secondary motor area                              | 0.25353036   | 2.333978383  | 4.46E-08 | 0.075270723 |
| right sensory root of the trigeminal nerve              | 0.01905383   | 2.642289321  | 2.42E-08 | 0.054589968 |
| right Septohippocampal nucleus                          | 0.001757888  | 1.748159041  | 1.66E-07 | 0.155801917 |
| right Simple lobule                                     | 0.161769025  | 2.044357368  | 8.77E-08 | 0.105469342 |
| right solitary tract                                    | -0.000377301 | -1.184306234 | 9.59E-07 | 0.314317324 |
| right Spinal nucleus of the trigeminal, caudal part     | 0.05500909   | 3.354162296  | 1.04E-08 | 0.028230329 |
| right Spinal nucleus of the trigeminal, interpolar part | 0.051982228  | 1.99025138   | 9.94E-08 | 0.112905854 |
| right Spinal nucleus of the trigeminal, oral part       | 0.034085913  | 2.761783449  | 1.97E-08 | 0.04911216  |

|                                                    |             |             |          |             |
|----------------------------------------------------|-------------|-------------|----------|-------------|
| right spinal tract of the trigeminal nerve         | 0.057718708 | 3.138530193 | 1.26E-08 | 0.034100839 |
| right Spinal vestibular nucleus                    | 0.02687428  | 2.965973505 | 1.48E-08 | 0.040846393 |
| right stria medullaris                             | 0.01570087  | 4.167346166 | 6.46E-09 | 0.016557529 |
| right stria terminalis                             | 0.018393386 | 2.750664662 | 2.02E-08 | 0.049416763 |
| right Subceruleus nucleus                          | 0.000908951 | 1.318596949 | 5.81E-07 | 0.267622454 |
| right subependymal zone                            | 0.008017636 | 3.021251156 | 1.39E-08 | 0.038625783 |
| right Subgeniculate nucleus                        | 0.000231527 | 0.439937351 | 4.71E-05 | 0.699383233 |
| right Subiculum                                    | 0.100662442 | 3.617018691 | 8.78E-09 | 0.022103493 |
| right Sublaterodorsal nucleus                      | 0.000720305 | 0.892942243 | 4.30E-06 | 0.435077659 |
| right Submedial nucleus of the thalamus            | 0.018727914 | 3.743598447 | 7.96E-09 | 0.02076658  |
| right Subparafascicular area                       | 0.0072545   | 2.800374636 | 1.84E-08 | 0.047643948 |
| right Subparafascicular nucleus                    | 0.013274187 | 4.947515564 | 5.27E-09 | 0.012947224 |
| right Subparaventricular zone                      | 0.005933937 | 2.512321907 | 2.98E-08 | 0.063283236 |
| right Substantia innominata                        | 0.081042536 | 2.296661867 | 4.77E-08 | 0.078826124 |
| right Substantia nigra, compact part               | 0.00561668  | 1.750475114 | 1.64E-07 | 0.155548595 |
| right Substantia nigra, reticular part             | 0.039462546 | 1.960767923 | 1.07E-07 | 0.117069699 |
| right Subthalamic nucleus                          | 0.007254479 | 3.781711442 | 7.99E-09 | 0.02076658  |
| right Superior central nucleus raphe               | 0.02744875  | 3.717661624 | 8.10E-09 | 0.02076658  |
| right superior cerebellar peduncles                | 0.028443416 | 3.364702745 | 1.03E-08 | 0.028089985 |
| right Superior colliculus                          | 0.258092534 | 2.780373271 | 1.92E-08 | 0.04822422  |
| right Superior olivary complex, lateral part       | 0.004716283 | 1.614884753 | 2.35E-07 | 0.184786067 |
| right Superior olivary complex, medial part        | 0.003395718 | 3.264476406 | 1.12E-08 | 0.03026965  |
| right Superior olivary complex, periolivary region | 0.00768323  | 2.01001749  | 9.43E-08 | 0.110269135 |
| right Superior vestibular nucleus                  | 0.015623745 | 2.832195957 | 1.74E-08 | 0.046507899 |
| right Supplemental somatosensory area              | 0.247442829 | 2.40124194  | 3.89E-08 | 0.069587455 |
| right supra-callosal cerebral white matter         | 0.051072952 | 4.704703343 | 6.14E-09 | 0.014437957 |
| right Suprachiasmatic nucleus                      | 0.002735436 | 2.3891874   | 4.02E-08 | 0.070543326 |
| right Suprageniculate nucleus                      | 0.006268368 | 3.76816084  | 7.88E-09 | 0.02076658  |
| right Supragenua nucleus                           | 0.000180075 | 0.622519521 | 1.87E-05 | 0.581800964 |
| right Supramammillary nucleus                      | 0.009158123 | 2.495857219 | 3.02E-08 | 0.064654827 |
| right Supraoculomotor periaqueductal gray          | 0.000531652 | 0.88301554  | 4.47E-06 | 0.440128543 |
| right supraoptic commissures                       | 8.58E-05    | 0.300032331 | 3.74E-04 | 0.786080484 |
| right Supraoptic nucleus                           | 0.001294827 | 1.605668465 | 2.42E-07 | 0.186890782 |
| right Supratrigeminal nucleus                      | 0.009569727 | 2.327549787 | 4.54E-08 | 0.07575441  |

|                                                        |              |              |          |             |
|--------------------------------------------------------|--------------|--------------|----------|-------------|
| right Taenia tecta, dorsal part                        | 0.015434976  | 1.181718046  | 9.81E-07 | 0.315009028 |
| right Taenia tecta, ventral part                       | 0.009372526  | 0.869556411  | 4.64E-06 | 0.447263948 |
| right Tegmental reticular nucleus                      | 0.033356969  | 2.803745222  | 1.83E-08 | 0.047643948 |
| right Temporal association areas                       | 0.116629502  | 3.062033853  | 1.35E-08 | 0.036839461 |
| right trapezoid body                                   | 0.003318539  | 1.110792386  | 1.45E-06 | 0.340286244 |
| right trochlear nerve                                  | -0.000120049 | -0.690338886 | 1.07E-05 | 0.544601125 |
| right Trochlear nucleus                                | 0.000197232  | 0.429479208  | 5.59E-05 | 0.705171856 |
| right Tuberal nucleus                                  | 0.002615361  | 0.276768074  | 6.43E-04 | 0.800606464 |
| right Tuberomammillary nucleus, dorsal part            | 0.001003286  | 1.291256854  | 6.28E-07 | 0.277063096 |
| right Tuberomammillary nucleus, ventral part           | 0.001020408  | 0.38883421   | 1.00E-04 | 0.729450674 |
| right uncinata fascicle                                | 0.002126636  | 0.996279856  | 2.93E-06 | 0.385028739 |
| right Ventral anterior-lateral complex of the thalamus | 0.045945051  | 3.964369281  | 6.98E-09 | 0.018762516 |
| right Ventral auditory area                            | 0.072364945  | 3.420985774  | 9.96E-09 | 0.026342661 |
| right Ventral cochlear nucleus                         | 0.032928258  | 2.442955136  | 3.47E-08 | 0.067403702 |
| right Ventral medial nucleus of the thalamus           | 0.067528453  | 3.641489486  | 8.65E-09 | 0.021637953 |
| right Ventral part of the lateral geniculate complex   | 0.018179089  | 3.020856122  | 1.40E-08 | 0.038625783 |
| right Ventral posterolateral nucleus of the thalamus   | 0.052453369  | 2.548184822  | 2.75E-08 | 0.061153979 |
| right Ventral posteromedial nucleus of the thalamus    | 0.130992291  | 3.272190041  | 1.12E-08 | 0.030151432 |
| right Ventral premammillary nucleus                    | 0.001234782  | 0.404289216  | 7.37E-05 | 0.720900371 |
| right ventral spinocerebellar tract                    | 0.005822476  | 2.055152413  | 8.42E-08 | 0.104397993 |
| right Ventral tegmental area                           | 0.018144858  | 2.703292424  | 2.15E-08 | 0.052014442 |
| right Ventral tegmental nucleus                        | 0.001226231  | 1.995126683  | 9.83E-08 | 0.112349479 |
| right Ventrolateral preoptic nucleus                   | 0.001877936  | 1.569052081  | 2.64E-07 | 0.196319964 |
| right Ventromedial hypothalamic nucleus                | 0.002435301  | 0.33340024   | 1.80E-04 | 0.765991453 |
| right Ventromedial preoptic nucleus                    | 0.001037579  | 1.13341725   | 1.34E-06 | 0.331003262 |
| right vestibular nerve                                 | 0.016155388  | 4.237515031  | 6.27E-09 | 0.015563882 |
| right Vestibulocerebellar nucleus                      | 0.005265093  | 2.694205728  | 2.18E-08 | 0.05252034  |
| right Visceral area                                    | 0.077887483  | 2.788892267  | 1.89E-08 | 0.047945195 |
| right vomeronasal nerve                                | 0.000557374  | 1.242675196  | 7.70E-07 | 0.293120038 |
| right Xiphoid thalamic nucleus                         | 0.00072031   | 0.316175033  | 2.36E-04 | 0.776959928 |
| right Zona incerta                                     | 0.076737946  | 4.189306368  | 6.43E-09 | 0.016557529 |
| root                                                   | 0.170677171  | 2.579449335  | 2.62E-08 | 0.059053541 |
| Rostral linear nucleus raphe                           | 0.006448451  | 3.361294534  | 1.03E-08 | 0.028097568 |
| Septofimbrial nucleus                                  | 0.041537424  | 4.058492143  | 6.71E-09 | 0.017198719 |

|                                          |              |              |          |             |
|------------------------------------------|--------------|--------------|----------|-------------|
| Subcommissural organ                     | 0.001054718  | 1.791806071  | 1.48E-07 | 0.147386595 |
| Subfornical organ                        | 0.00330139   | 3.300297815  | 1.08E-08 | 0.029604202 |
| superior cerebellar peduncle decussation | 0.004073145  | 2.846828242  | 1.70E-08 | 0.045987579 |
| superior colliculus commissure           | 0.001423453  | 2.179594158  | 6.19E-08 | 0.090213194 |
| third ventricle                          | 0.098835748  | 4.580543771  | 5.79E-09 | 0.014437957 |
| Triangular nucleus of septum             | 0.036229519  | 3.860996172  | 7.33E-09 | 0.019935335 |
| Uvula (IX)                               | 0.160482148  | 1.145915017  | 1.18E-06 | 0.327633191 |
| Vascular organ of the lamina terminalis  | -0.000248671 | -0.596032071 | 1.99E-05 | 0.599001937 |
| ventral hippocampal commissure           | 0.004561938  | 2.189534812  | 5.97E-08 | 0.089470194 |
| ventral tegmental decussation            | 0.002864065  | 2.357205366  | 4.25E-08 | 0.073470476 |
